# Supplementary material for: Th7R Cells: CD4⁺ T-Cell Partners That Drive Tpex-Mediated Antitumor Immunity in the Tumor Microenvironment
Source: Research Square preprint supplement (doi:10.21203/rs.3.rs-6764582/v1), 2025-06-04
Supplement: Supplementary file 1 [file 75290eaf9ae9cd0d6b4160be.docx]

**Supplementary Data**

**Fig. S1.**

Representative gene expression data for each CD4+ T-cell cluster are shown in violin plots (A; peripheral blood; B; tumor-infiltrating lymphocytes).

**Fig. S2.**

**A:** Feature importance scores of 64 genes evaluated by SVM-RFE. The bar plot illustrates the relative importance of 64 gene expression features for classifying Th1, Th7R and Th17 cells. Feature importance was assessed using support vector machine–based recursive feature elimination (SVM-RFE).

**B:** ROC curves for three-class classification of T-cell subtypes using a one-vs.-all approach. AUC values indicate the discriminative performance for each subtype.

**C:** Classification performance during SVM-RFE. The accuracy is plotted against the number of genes used to classify three T-cell subtypes.

**D:** Predicted probabilities for Th1, Th7R and Th17 subtypes in *SELL* low-expression clusters using the trained SVM model.

**E:** Cosine similarity score was used to quantify the similarity between clusters.

**Fig. S3.**

**A:** UMAP plots derived independently from nuclear RNA expression (nRNA) and chromatin accessibility data (ATAC). Nuclei are colored according to clusters defined by a weighted nearest neighbor (WNN) integration of both modalities as shown in Fig.1H.

**B:** Violin plots of representative nuclear RNA expression data for each cluster.

**C:** Heatmap showing the expression of 58 signature genes in *SELL* low-expression clusters on the basis of nuclear RNA expression.

**D:** Predicted probabilities for Th1, Th7R and Th17 subtypes in *SELL* low-expression clusters using the trained SVM model.

**E:** Annotations of clusters predicted using SVM model are shown in nRNA UMAP plots and ATAC UMAP plots.

**Fig. S4.**

Coverage plots showing chromatin accessibility at signature gene loci via single-cell ATAC-seq. Tracks represent normalized accessibility signals for Th1, Th7R and Th17 clusters. Gene annotation tracks show the locations of known genes, and peak tracks indicate accessible chromatin regions identified by peak calling.

**Fig. S5.**

**A:** Violin plot of representative gene expression among all 27 clusters obtained from 8 lung cancer patients.

**B:** Heatmap of 58 signature genes expressed in clusters of TIL-CD4+ T cells obtained from 8 lung cancer patients, excluding CD45RA+CCR7+ naïve and CD45RA-CCR7+ central memory T cells.

**C:** *SELL* expression in a UMAP plot of CD4+CD3D+ cells obtained from 8 lung cancer patients. The Th type probabilities were derived via SVM-based classifier using the expression of 58 signature genes in each cluster, excluding naïve and central memory T cells.

**D:** Gene expression comparisons between TIL and peripheral blood (PB) of Th1 and Th17 clusters are shown in volcano plots.

**E:** Gene expression comparisons between Th7R and Th17 cells and between Th17 and Th1 cells within tumors are shown in volcano plots.

**Fig. S6**.

Representative gene expression data for each CD8+ T-cell cluster obtained by unsupervised clustering are shown in violin plots (**A**; TILs, **B**; peripheral blood).

**Fig. S7.**

Results of the IHC analysis of surgically obtained lung cancer tissue.

The results of multiple staining, CXCR3 staining, and CCR6 staining are shown in high-magnification images of six TLS formation sites. No.6 is the same position as Fig.3A.

**Fig. S8.**

**A:** Cell annotation diagram based on molecular expression information obtained by Hyperion analysis.

**B:** Numerical network analysis was performed on the basis of the percentages of 4 CD4+ T-cell clusters (Th1, Th7R, Th17, and Treg) and 4 CD8+ T-cell clusters (GZMB-GZMK- naïve/central memory (CM), GZMB+GZMK- CTL, GZMB-GZMK+ Tpex, and GZMB+GZMK+ Tex). Samples were obtained from 112 samples derived from 40 patients. The network for a total of 8 T-cell clusters was inferred with a modified path consistency algorithm. The inference was performed 1000 times, and the connections established more than 500 times were set as significant in this analysis. The green circles indicate CD8+ T-cell clusters, and the purple circles indicate CD4+ T-cell clusters. The red lines indicate positive correlations, and the blue dashed lines indicate negative correlations. In the table, freq indicates the ratio of the established connection; freq 1 means that the connection was established in 1000 of the 1000 interferences.

**Fig. S9.**

Gating strategies for mass cytometry analysis.

**Table S1**. Total cell counts and cell counts for multicellular TCR clonotypes in CD4+ T-cell clusters from TILs and peripheral blood.

**Table S2**.Significance of signature genes derived from presorted scRNA-seq analysis. Averaged log2(fold change), adjusted p-value, percent of cells expressing each signature gene were shown for S1, S2 and S3 samples.

**Table S3.** Numerical differences in CD4+ clusters between TILs and PBMCs from 8 lung cancer patients.

**Table S4.** Differential expression analysis of the Th1 cluster (13+26) and the Th7R cluster (18+21) in TILs. Only genes with adjusted p values < 0.05 are shown.

**Table S5.** Differential expression analysis of clusters 13+26 and 18+21 in TILs. Only genes with adjusted p values < 0.05 are shown.

**Table S6.** Demographics of the patients in the IHC cohort.

**Table S7.** Numerical differences in CD8+ clusters between TILs and PBMCs from 8 lung cancer patients.

**Table S8.** Demographics of the neoadjuvant cohort.

**Table S9.** Antibodies used for HyperionTM analysis.

**Table S10.** Product information for the TotalSeq™-C antibodies used in our study.

**Table S11.** Summary of the raw sequence data from the scRNA-seq analysis.

**Table S12.** Antibodies used for mass cytometry analysis.
