# Supplementary material for: Th7R Cells: CD4⁺ T-Cell Partners That Drive Tpex-Mediated Antitumor Immunity in the Tumor Microenvironment
Source: Research Square preprint supplement (doi:10.21203/rs.3.rs-6764582/v1), 2025-06-04
Supplement: Supplementary file 1 [file eae089c1dffa8038e89ea408.pdf]

A.

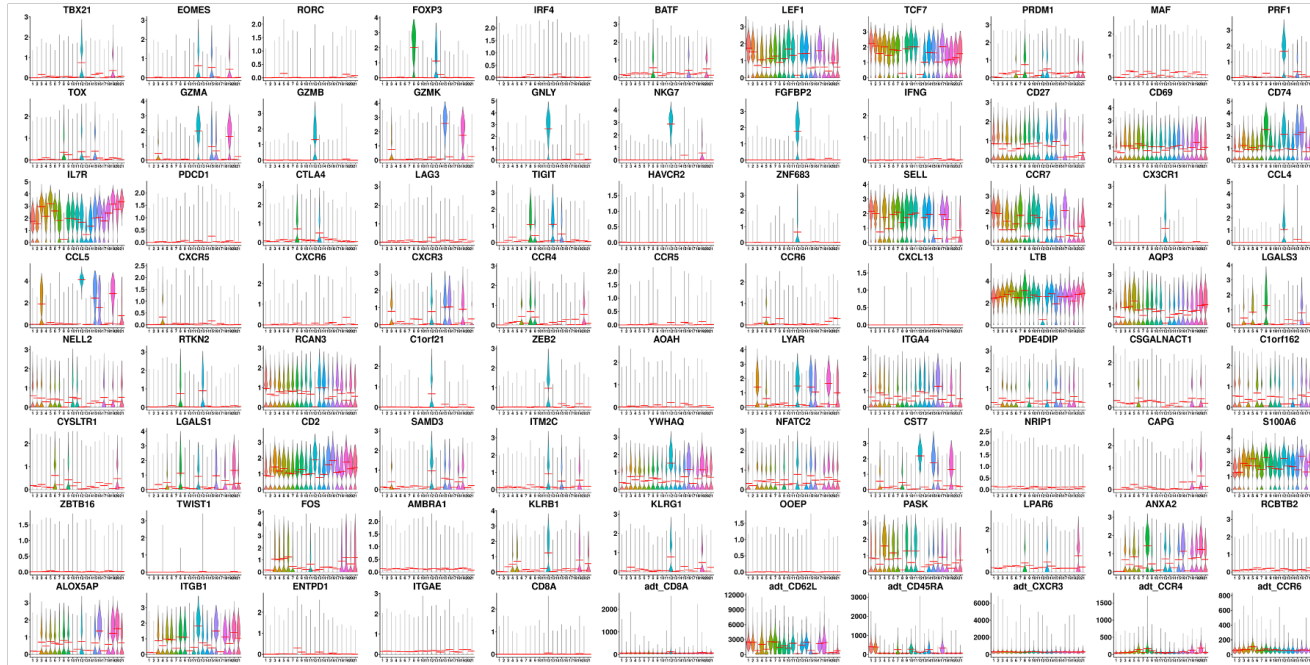

B.

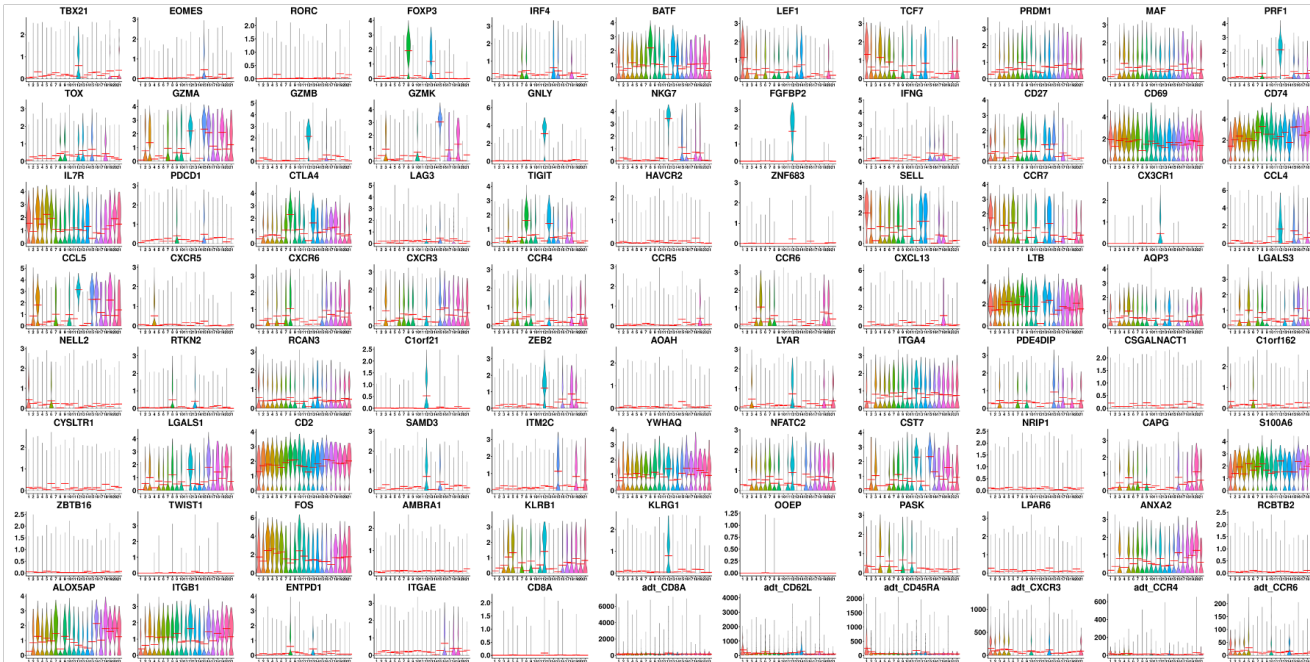

Fig. S1

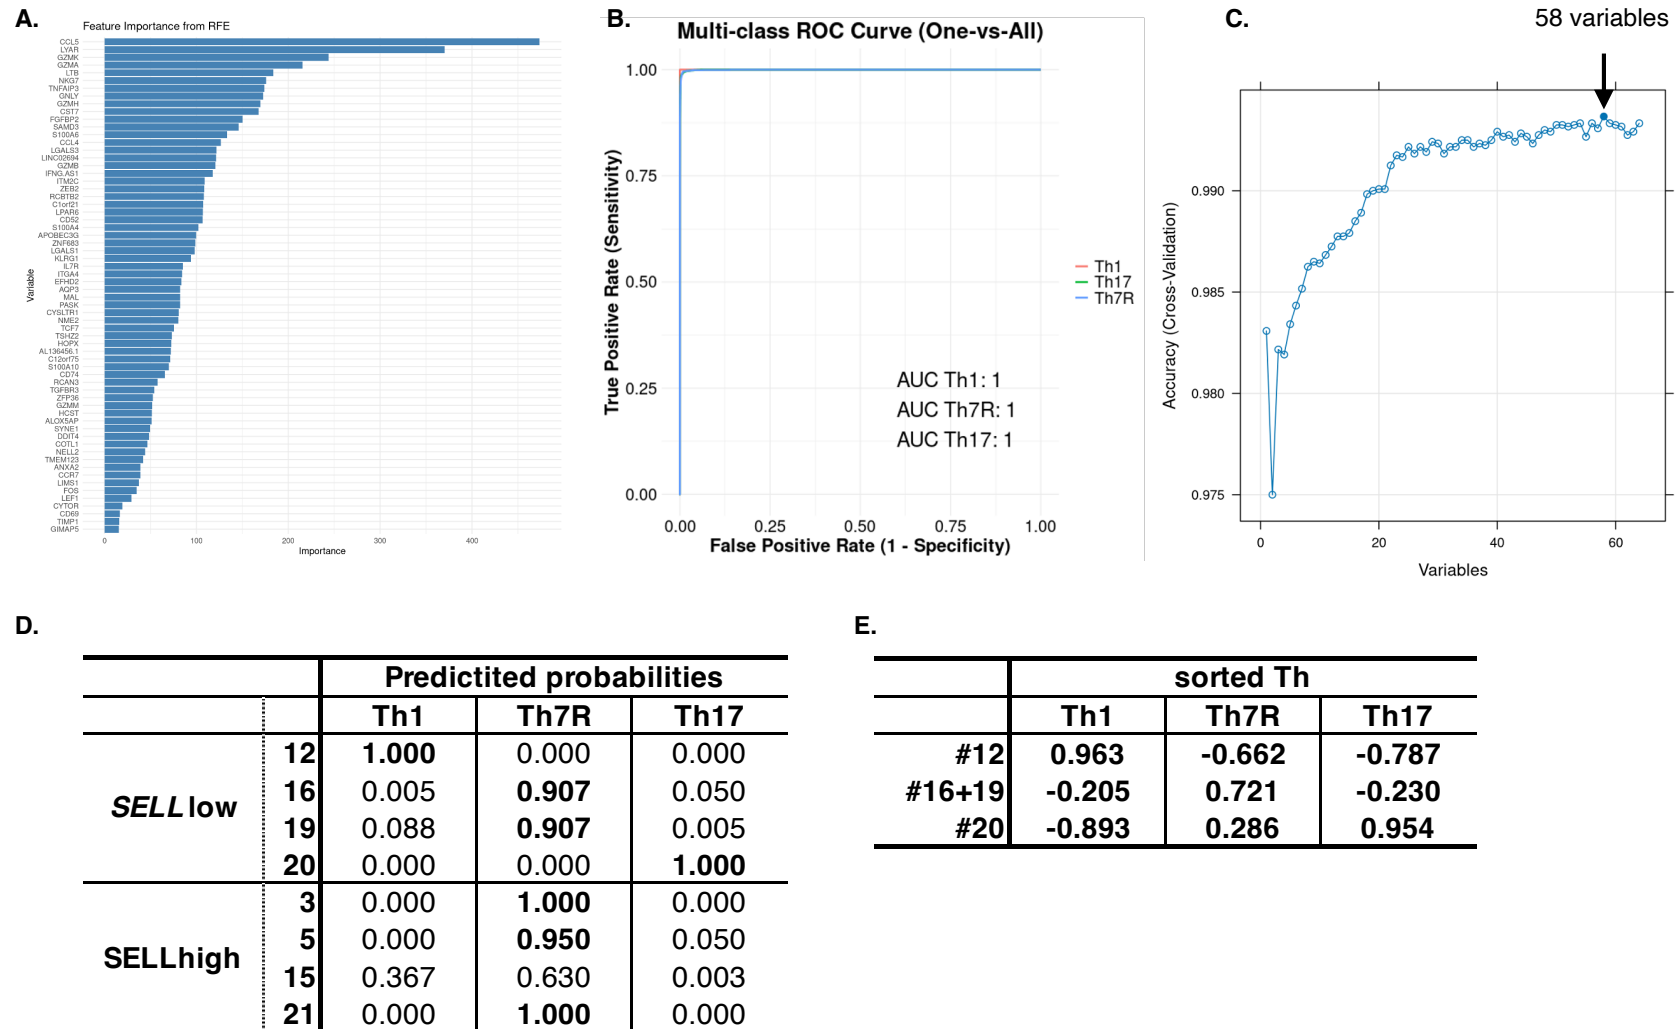

**Fig. S2**

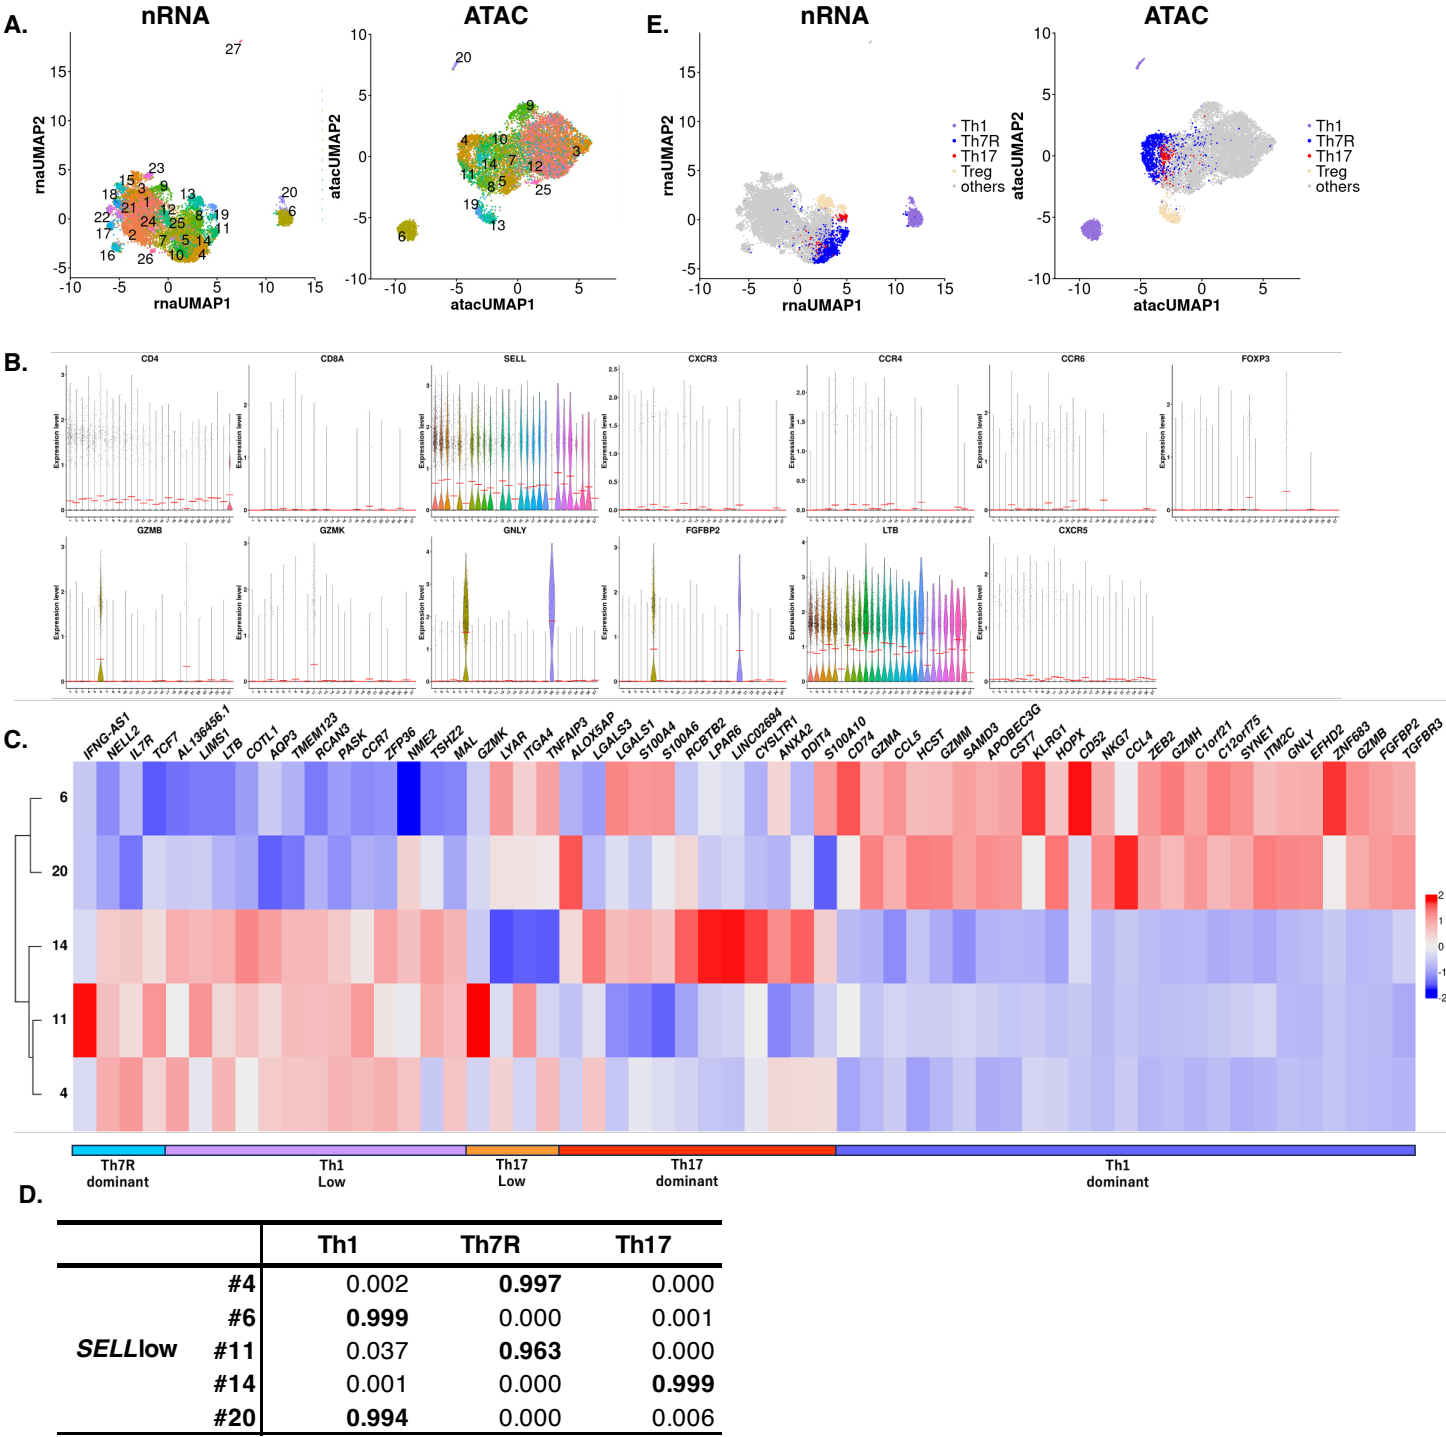

Fig. S3

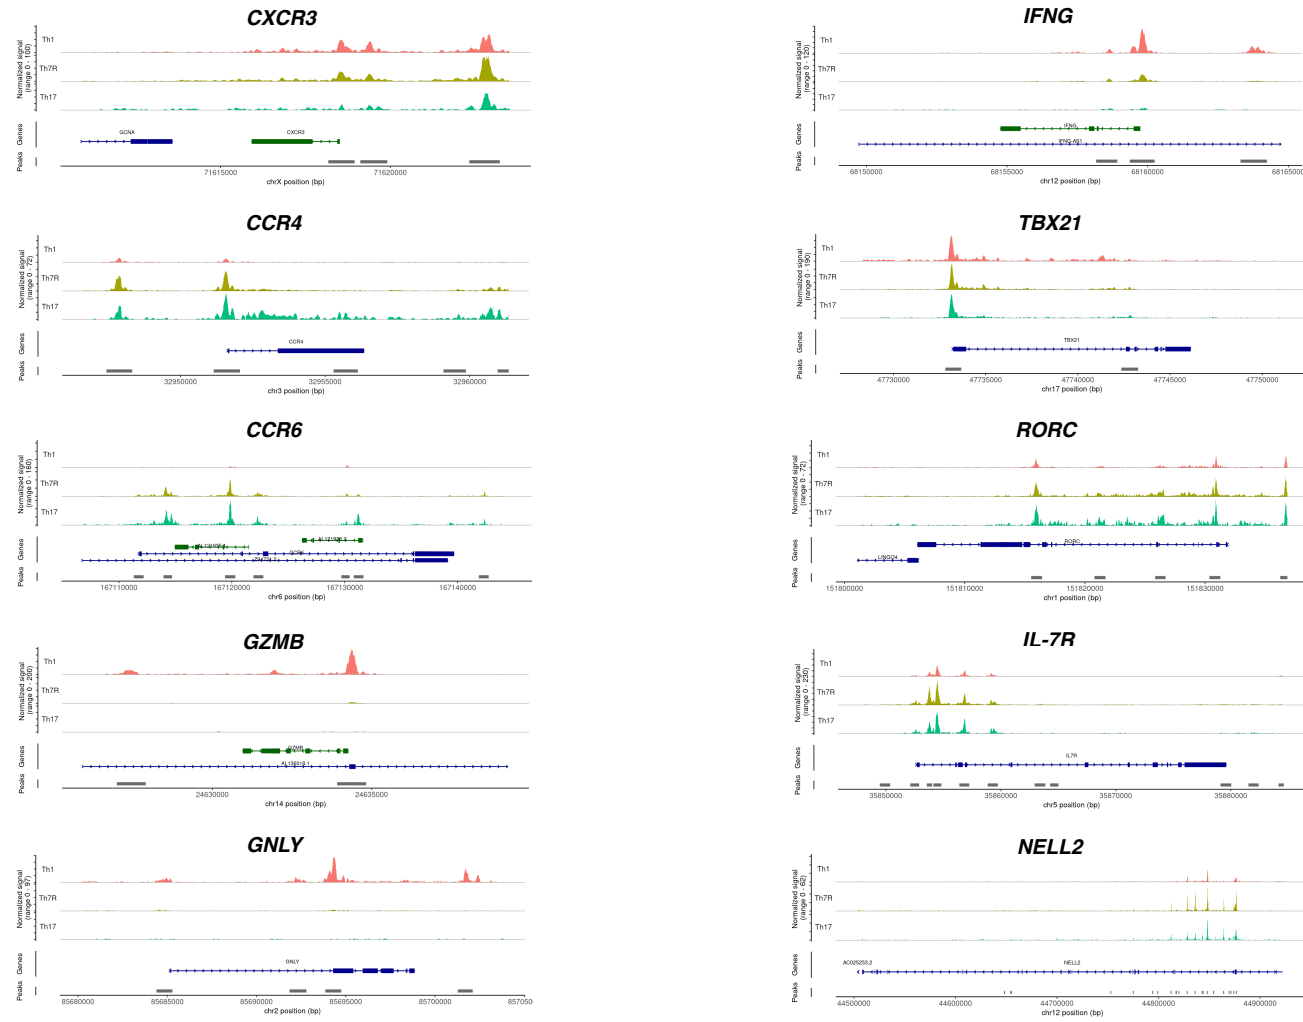

**Fig. S4**



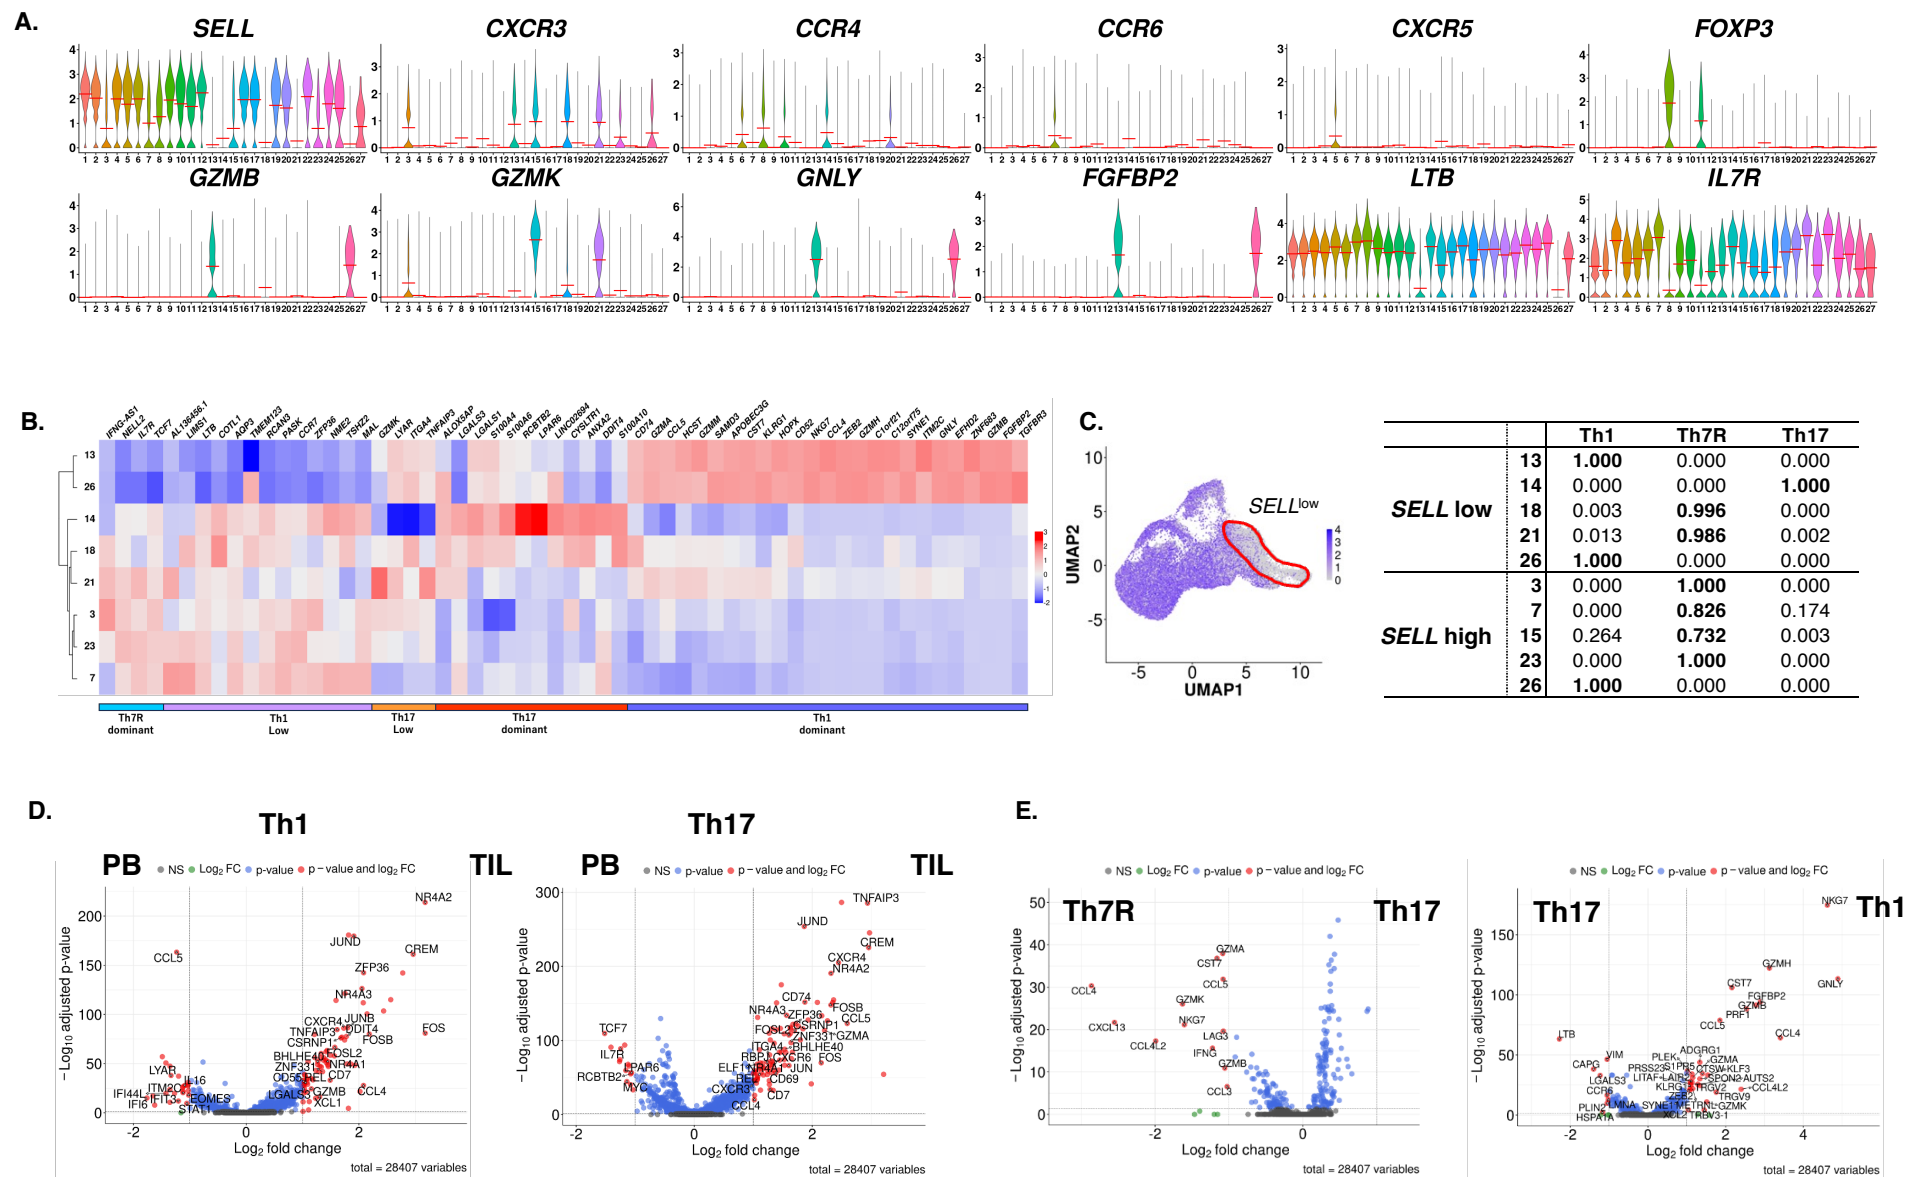

**Fig. S5**

A.

TIL

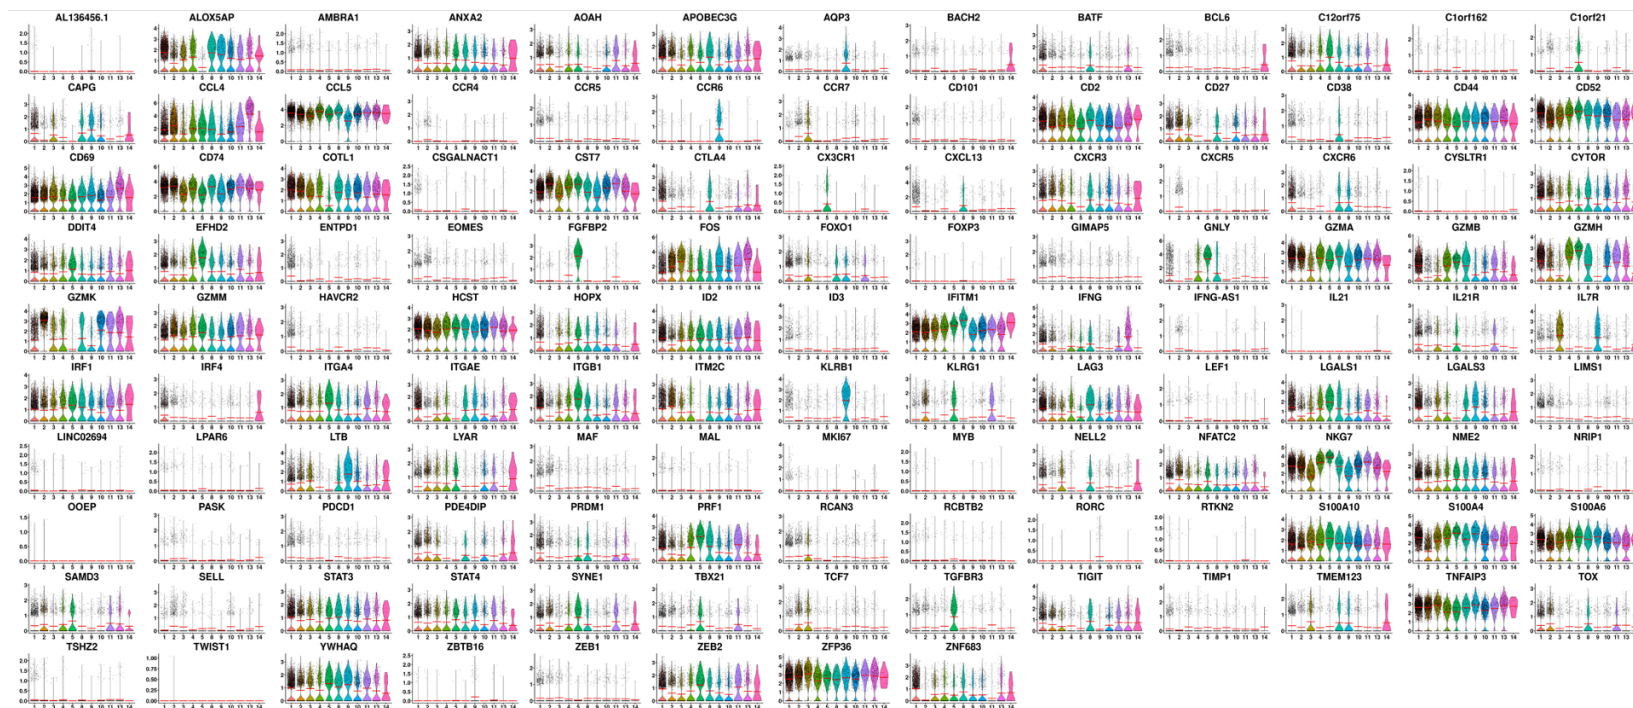

B.

PB

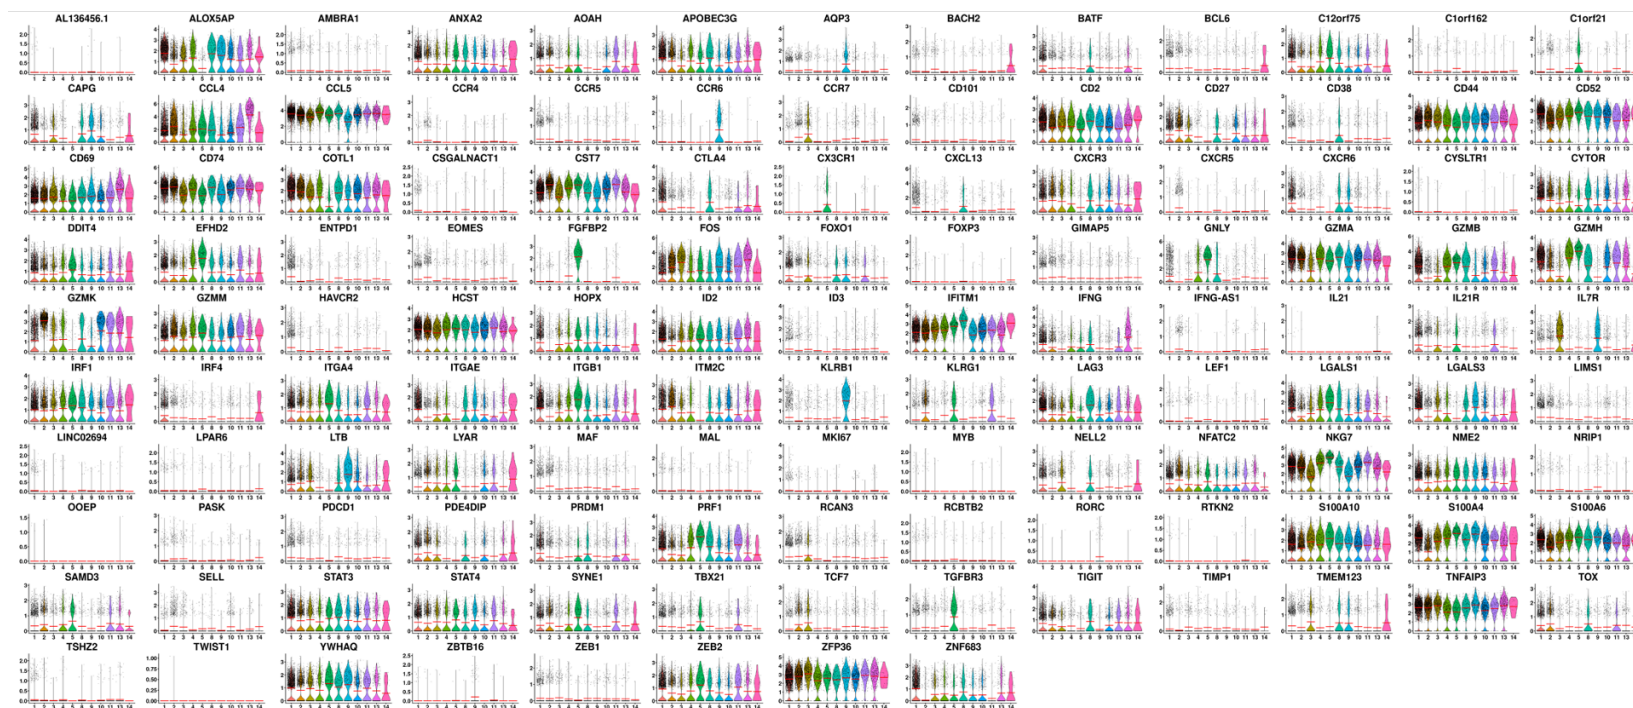

Fig. S6



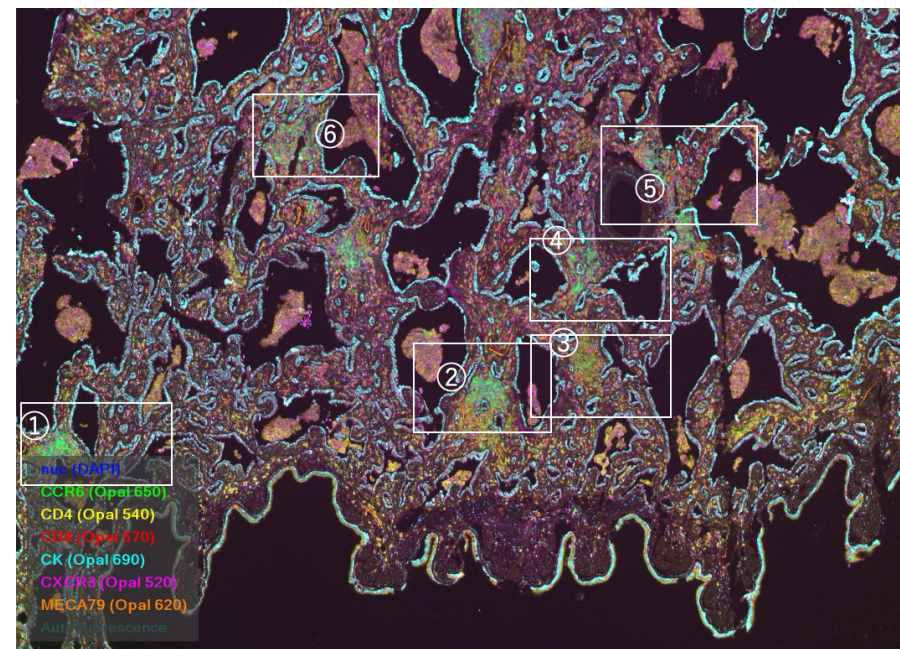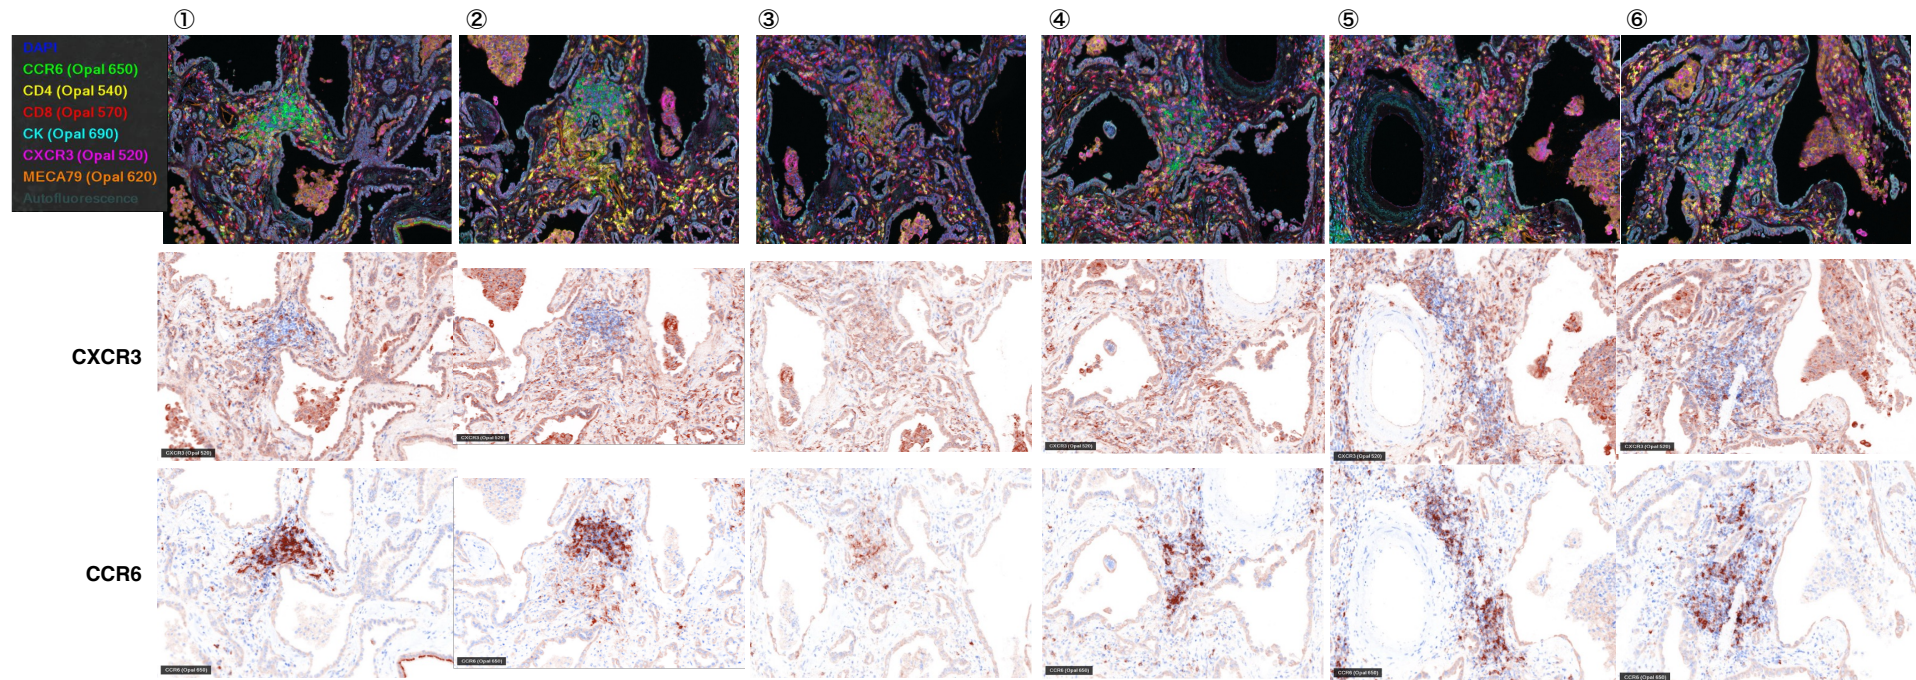

Fig. S7

A.

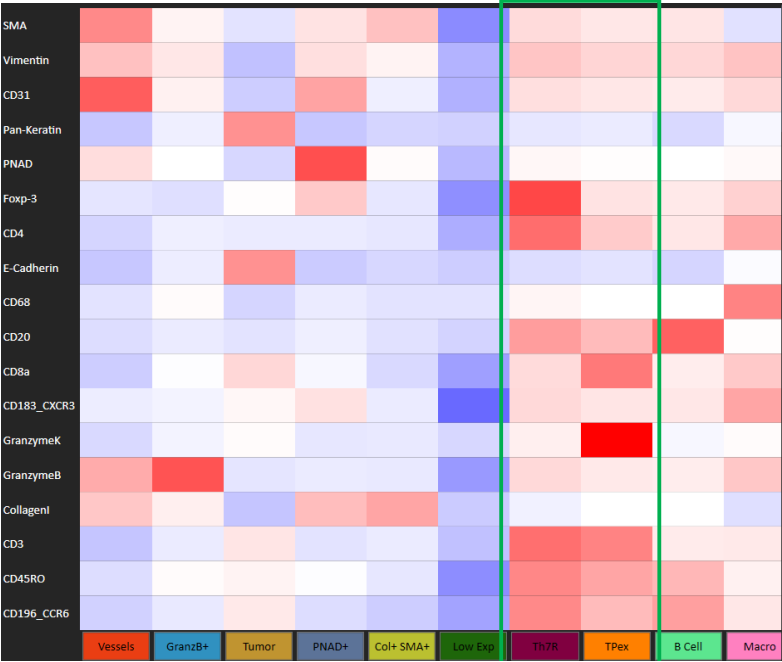

B.

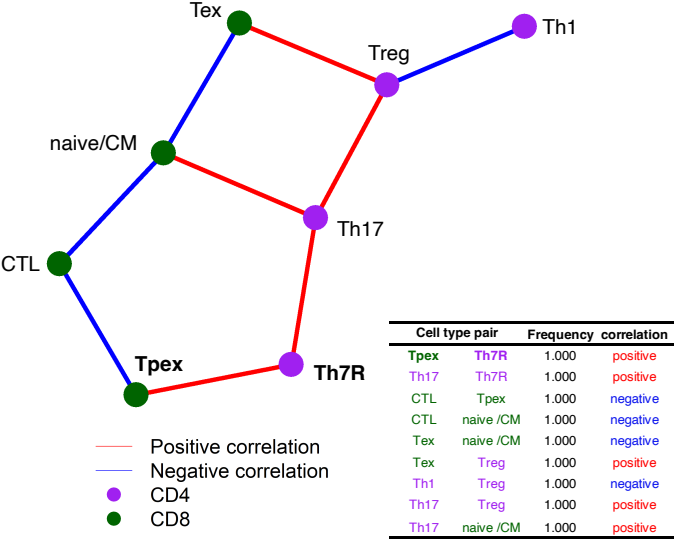

Fig. S8

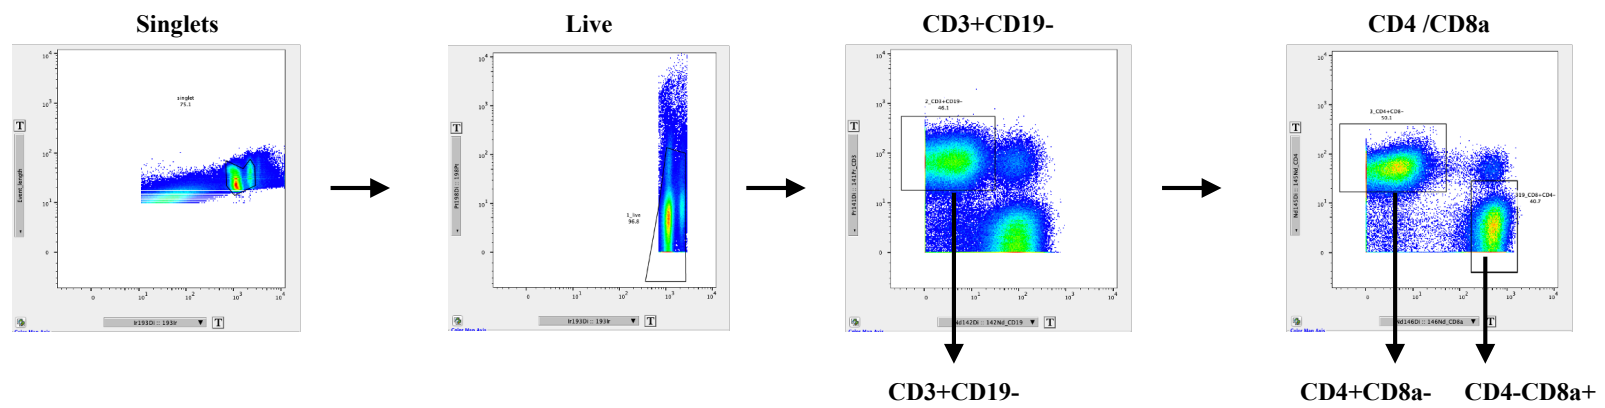

Gating strategies for mass cytometry analysis

**Fig. S9**
