# Supplementary material for: Th7R Cells: CD4⁺ T-Cell Partners That Drive Tpex-Mediated Antitumor Immunity in the Tumor Microenvironment
Source: Research Square preprint supplement (doi:10.21203/rs.3.rs-6764582/v1), 2025-06-04
Supplement: Supplementary file 2 [file 9468819aa8a9c467bdcabefa.xlsx]

## Sheet: Table S1
Table S1
Total cell counts and cell counts for multicellular TCR clonotypes in CD4+ T-cell clusters from TILs and peripheral blood
CD4	All		Multicellular
	TILs	PBMC1	TILs	PBMCs	TILs	PBMCs
1	171	4392	2	27	0.0116959	0.00614754
2	169	3070	49	25	0.289941	0.00814332
3	882	2129	275	278	0.311791	0.130578
4	589	1696	49	26	0.0831919	0.0153302
5	754	1554	130	160	0.172414	0.10296
6	332	1552	25	124	0.0753012	0.0798969
7	235	2003	72	47	0.306383	0.0234648
8	1233	755	474	39	0.384428	0.0516556
9	363	1204	79	66	0.217631	0.0548173
10	237	1063	81	16	0.341772	0.0150517
11	356	1050	76	24	0.213483	0.0228571
12	139	1081	108	990	0.776978	0.915819
13	466	706	120	19	0.257511	0.0269122
14	78	710	7	17	0.0897436	0.0239437
15	597	491	258	92	0.432161	0.187373
16	966	310	571	54	0.591097	0.174194
17	67	663	26	6	0.38806	0.00904977
18	80	569	38	91	0.475	0.15993
19	196	465	104	253	0.530612	0.544086
20	117	519	29	98	0.247863	0.188825
21	52	236	14	36	0.269231	0.152542

## Sheet: Table S2
Table S2
Significance of signature genes derived from pre-sorted scRNA-seq analysis
Th1-dominant genes
	S1				S2				S3
	average(log2FC)	adjusted p-value	%Th1 cells	%non-Th1 cells	average(log2FC)	adjusted p-value	%Th1 cells	%non-Th1 cells	average(log2FC)	adjusted p-value	%Th1 cells	%non-Th1 cells
CD74	1.36613	0	0.813	0.559	1.19752	6.8249e-264	0.789	0.629	1.45822	6.55521e-70	0.838	0.68
GZMA	2.48842	0	0.696	0.078	2.30415	0	0.69	0.075	2.7203	1.77893e-166	0.819	0.086
CCL5	3.04661	0	0.975	0.196	3.61612	0	0.962	0.201	3.72245	3.00628e-250	0.995	0.221
HCST	0.9579	4.04201e-177	0.612	0.385	1.07573	4.17883e-249	0.623	0.323	1.02867	6.52493e-39	0.625	0.426
GZMM	1.07838	9.5379e-191	0.385	0.134	0.801639	2.21153e-134	0.382	0.189	0.940541	2.4496e-44	0.394	0.213
SAMD3	1.68135	0	0.474	0.069	1.30501	3.83E-315	0.442	0.094	1.83801	4.21718e-113	0.639	0.115
CYTOR	0.815051	4.02968e-93	0.328	0.15	0.572687	6.47724e-56	0.284	0.167	1.07251	1.6685e-30	0.444	0.159
APOBEC3G	1.66791	0	0.483	0.075	1.1372	1.72711e-250	0.32	0.06	1.73123	9.04361e-121	0.602	0.129
CST7	1.99507	0	0.621	0.107	2.25179	0	0.746	0.143	3.02001	1.3093e-281	0.921	0.141
KLRG1	1.42503	4.17E-314	0.414	0.085	1.08385	2.98829e-231	0.328	0.067	1.06733	5.1191e-39	0.361	0.09
HOPX	1.16654	8.79659e-207	0.358	0.092	1.20361	3.38534e-258	0.364	0.075	0.803162	7.7824e-14	0.421	0.218
CD52	0.893605	0	0.973	0.94	0.772461	2.14471e-261	0.982	0.948	0.979465	6.2618e-62	0.981	0.976
NKG7	3.45814	0	0.772	0.02	3.42825	0	0.73	0.015	4.24154	0	0.949	0.013
CCL4	1.94068	0	0.395	0.012	1.69386	0	0.367	0.003	1.69454	5.25531e-129	0.431	0.001
ZEB2	1.87451	0	0.43	0.032	1.4672	0	0.376	0.037	2.17079	9.00871e-153	0.611	0.027
GZMH	3.09461	0	0.689	0.012	2.88972	0	0.602	0.004	3.50997	9.60E-312	0.843	0
C1orf21	1.52397	0	0.33	0.01	1.41721	0	0.346	0.008	1.82163	5.79742e-133	0.435	0.001
C12orf75	1.4091	3.58E-317	0.479	0.119	1.42637	0	0.494	0.131	1.3967	5.00278e-72	0.532	0.163
SYNE1	1.23979	3.03255e-236	0.44	0.167	0.969481	8.35096e-193	0.375	0.159	1.7038	1.75773e-108	0.648	0.242
ITM2C	1.75149	0	0.446	0.052	1.41751	0	0.384	0.063	1.5677	3.29887e-83	0.38	0.071
GNLY	4.00317	0	0.77	0.022	4.25311	0	0.804	0.03	3.02043	1.27649e-163	0.588	0.006
EFHD2	1.32845	8.80956e-273	0.445	0.131	1.34148	0	0.502	0.153	1.53366	4.76107e-103	0.583	0.202
ZNF683	2.13418	0	0.369	0.006	1.48263	3.88523e-302	0.203	0.001	0.919738	7.73248e-40	0.134	0
GZMB	1.60179	0	0.298	0.007	1.40163	0	0.268	0.001	1.85288	8.72317e-136	0.421	0
FGFBP2	2.80453	0	0.57	0.01	2.7622	0	0.578	0.002	3.61974	8.93E-311	0.847	0
TGFBR3	1.21239	6.62818e-223	0.351	0.087	0.993034	1.39137e-184	0.305	0.082	1.31058	2.32267e-62	0.403	0.105
Th7R-dominant genes
	S1				S2				S3
	average(log2FC)	adjusted p-value	%Th7R cells	%non-Th7R cells	average(log2FC)	adjusted p-value	%Th7R cells	%non-Th7R cells	average(log2FC)	adjusted p-value	%Th7R cells	%non-Th7R cells
IFNG-AS1	0.372925	1.38151e-35	0.084	0.022	0.271648	6.15122e-20	0.065	0.024	0.675176	8.04127e-73	0.122	0.007
CD69	0.606858	1.64582e-73	0.715	0.551	0.179545	0.000432359	0.447	0.391	0.489398	1.2705e-37	0.706	0.605
NELL2	0.62029	2.10311e-58	0.217	0.092	0.496342	4.43982e-54	0.211	0.099	0.541966	2.53832e-34	0.315	0.182
IL7R	0.981427	9.81458e-241	0.912	0.761	0.333804	2.83048e-37	0.905	0.85	0.612543	1.68906e-92	0.961	0.878
TCF7	0.488256	1.89511e-60	0.501	0.319	0.550776	1.29264e-100	0.612	0.412	0.362178	6.04771e-29	0.744	0.629
FOS	1.09227	1.87398e-149	0.501	0.233	0.500412	1.14432e-40	0.275	0.16	0.624054	1.13702e-33	0.5	0.342
Th17-dominant genes
	S1				S2				S3
	average(log2FC)	adjusted p-value	%Th17 cells	%non-Th17 cells	average(log2FC)	adjusted p-value	%Th17 cells	%non-Th17 cells	average(log2FC)	adjusted p-value	%Th17 cells	%non-Th17 cells
ALOX5AP	0.525904	1.71971e-70	0.484	0.294	0.446144	4.25944e-57	0.503	0.318	0.408158	1.38089e-33	0.582	0.41
LGALS3	1.0821	3.35202e-163	0.446	0.193	0.962476	8.84525e-145	0.507	0.243	0.464222	1.03421e-21	0.554	0.427
LGALS1	0.792586	2.69254e-60	0.356	0.206	0.922461	9.27374e-87	0.408	0.213	0.827254	1.82785e-51	0.379	0.2
S100A4	0.652387	9.99893e-84	0.83	0.752	0.647527	5.06637e-89	0.886	0.791	0.605867	3.04338e-45	0.865	0.783
S100A6	0.576416	2.71252e-107	0.928	0.84	0.670392	8.98046e-163	0.96	0.88	0.430279	1.30096e-53	0.971	0.931
RCBTB2	0.703128	3.76788e-88	0.256	0.095	0.732477	3.9956e-132	0.255	0.064	0.51371	5.59733e-47	0.269	0.112
LPAR6	0.773009	4.6344e-119	0.363	0.151	0.680105	9.14114e-112	0.287	0.095	0.475839	2.88901e-49	0.276	0.114
LINC02694	0.626577	2.19884e-85	0.133	0.025	0.50503	2.23078e-88	0.118	0.016	0.529503	2.36042e-64	0.132	0.018
CYSLTR1	0.784366	3.95266e-118	0.223	0.058	0.571626	6.69355e-93	0.199	0.053	0.334697	1.09078e-25	0.157	0.062
ANXA2	0.421293	9.57008e-38	0.369	0.235	0.472591	1.22983e-49	0.501	0.33	0.400607	6.99726e-30	0.564	0.399
DDIT4	0.638139	2.47487e-80	0.181	0.053	0.326236	1.65572e-33	0.119	0.043	0.302943	3.15023e-19	0.228	0.125
S100A10	0.554386	3.09777e-97	0.887	0.771	0.428618	3.63595e-63	0.918	0.825	0.199508	2.08961e-08	0.911	0.867
Th1-low genes
	S1				S2				S3
	average(log2FC)	adjusted p-value	%Th1 cells	%non-Th1 cells	average(log2FC)	adjusted p-value	%Th1 cells	%non-Th1 cells	average(log2FC)	adjusted p-value	%Th1 cells	%non-Th1 cells
AL136456.1	-1.196	4.68532e-184	0.025	0.25	-1.15882	4.89121e-184	0.024	0.262	-1.56777	2.69955e-36	0.019	0.408
LIMS1	-0.941001	3.43608e-124	0.099	0.322	-0.906322	3.03433e-149	0.095	0.356	-1.30258	4.59437e-35	0.074	0.499
GIMAP5	-0.333488	7.27059e-36	0.208	0.34	-0.473721	3.18595e-57	0.222	0.403	-0.67106	8.15359e-13	0.213	0.502
LTB	-2.34939	0	0.275	0.929	-2.06149	0	0.394	0.953	-3.45886	1.29575e-252	0.241	0.987
COTL1	-0.829611	9.00032e-142	0.255	0.541	-0.833511	2.10267e-195	0.274	0.623	-0.576336	7.53894e-27	0.245	0.618
TIMP1	-0.782156	4.078e-98	0.144	0.358	-0.592963	6.63604e-69	0.179	0.371	-1.02225	8.05039e-23	0.12	0.477
AQP3	-1.18425	1.60398e-229	0.055	0.349	-1.13343	6.80339e-243	0.089	0.435	-1.54138	2.23721e-56	0.009	0.51
TMEM123	-0.972007	2.62214e-200	0.235	0.571	-0.908451	9.84377e-203	0.253	0.606	-1.15622	1.2745e-37	0.181	0.646
RCAN3	-1.10506	6.5902e-221	0.039	0.312	-0.958773	1.64153e-189	0.05	0.322	-1.34814	4.97793e-48	0.014	0.472
PASK	-1.39561	7.33433e-235	0.022	0.286	-1.60996	0	0.058	0.461	-1.48253	5.63497e-34	0.032	0.421
CCR7	-0.893665	7.42767e-154	0.039	0.254	-0.808004	7.35343e-149	0.044	0.269	-1.04303	5.36043e-28	0.005	0.312
ZFP36	-1.14996	4.4689e-196	0.214	0.538	-0.884617	3.83775e-150	0.414	0.701	-1.45266	7.09785e-41	0.278	0.745
LEF1	-0.71807	6.1414e-105	0.142	0.363	-0.798996	4.73559e-137	0.091	0.338	-0.904206	1.3213e-17	0.097	0.403
NME2	-1.07718	1.2686e-200	0.181	0.507	-1.04926	3.99181e-221	0.258	0.62	-1.32172	4.05759e-45	0.199	0.702
TSHZ2	-1.17709	3.58185e-180	0.014	0.219	-1.1899	2.78693e-204	0.021	0.276	-0.971364	9.67725e-19	0	0.211
MAL	-1.17357	4.29785e-235	0.021	0.283	-1.33485	0	0.04	0.422	-1.27502	5.02974e-42	0.005	0.411
Th17-low genes
	S1				S2				S3
	average(log2FC)	adjusted p-value	%Th17 cells	%non-Th17 cells	average(log2FC)	adjusted p-value	%Th17 cells	%non-Th17 cells	average(log2FC)	adjusted p-value	%Th17 cells	%non-Th17 cells
GZMK	-1.65363	2.06138e-226	0.003	0.193	-1.35646	4.86538e-170	0.001	0.173	-0.930096	3.62678e-97	0.001	0.138
LYAR	-1.49726	1.06901e-305	0.088	0.419	-1.90025	0	0.079	0.489	-1.72435	3.5173e-254	0.134	0.524
ITGA4	-0.357001	1.97417e-38	0.284	0.425	-0.783557	2.21053e-110	0.209	0.444	-0.72559	6.30615e-81	0.328	0.577
TNFAIP3	-1.1243	7.57012e-216	0.34	0.627	-0.952729	8.18054e-138	0.389	0.599	-0.950752	9.78581e-101	0.511	0.701

## Sheet: Table S3
Table S3
Numerical differences in CD4+ clusters between TILs and PBMCs from 8 lung cancer patients
CD4	TILs	PBMC1	%TILs	%PBMC1	p-value
1	278	6226	0.0205045	0.151183	1.87404e-05
2	411	5632	0.0303142	0.136759	5.11048e-05
3	1230	2892	0.0907213	0.0702249	0.186603
4	1524	2779	0.112406	0.0674809	0.00838128
5	806	2638	0.0594483	0.0640571	0.850201
6	515	2666	0.037985	0.064737	0.0984184
7	1131	2134	0.0834194	0.0518188	0.0821109
8	1628	1134	0.120077	0.0275363	0.000276625
9	249	1615	0.0183655	0.0392162	0.0625812
10	523	1389	0.038575	0.0337283	0.376134
11	1039	1055	0.0766337	0.025618	0.000171558
12	76	1556	0.00560555	0.0377835	0.00217836
13	289	1144	0.0213158	0.0277791	0.980766
14	534	1167	0.0393863	0.0283376	0.323138
15	1002	716	0.0739047	0.0173862	0.00743668
16	148	1289	0.0109161	0.0313001	0.00217523
17	163	990	0.0120224	0.0240396	0.0342588
18	1245	364	0.0918277	0.00883881	0.00183407
19	184	882	0.0135713	0.0214171	0.165621
20	48	710	0.00354035	0.0172405	0.00576905
21	206	510	0.015194	0.0123841	0.680741
22	108	696	0.00796578	0.0169006	0.118211
23	45	337	0.00331907	0.00818319	0.00913127
24	115	252	0.00848208	0.00611918	0.39756
25	52	257	0.00383537	0.00624059	0.22447
26	7	132	0.0005163	0.00320528	0.232454
27	2	20	0.000147514	0.000485649	0.0448147

## Sheet: Table S4
Table S4
Differential expression analysis of TILs and peripheral blood mononuclear cells for clusters 18+21. Only genes with adjusted p-value < 0.05 are shown.
Gene	average(log2FC)	p-value	adjusted p-value	% of cells expressing among TILs	% of cells expressing among PBMC1
HSPA1A	3.85841	3.0673e-74	8.71328e-70	0.476	0.224
CCL4	3.53585	2.76683e-69	7.85975e-65	0.362	0.077
HSPA1B	3.38334	2.16505e-72	6.15025e-68	0.332	0.051
CXCL13	3.29666	2.82729e-77	8.03147e-73	0.23	0
CREM	2.92322	3.66917e-280	1.0423e-275	0.784	0.12
DUSP4	2.87594	4.20133e-267	1.19347e-262	0.768	0.093
RGCC	2.7378	1.96378e-266	5.57851e-262	0.883	0.406
FOSB	2.44894	4.9626e-134	1.40973e-129	0.538	0.087
SRGN	2.3534	0	0	0.987	0.771
LMNA	2.24993	1.22589e-129	3.48239e-125	0.564	0.125
DNAJA1	2.12107	2.623e-174	7.45115e-170	0.775	0.33
NR4A2	2.09612	3.85103e-176	1.09396e-171	0.591	0.061
CD7	2.08807	8.54238e-94	2.42663e-89	0.542	0.304
RGS1	2.01564	2.42184e-147	6.87972e-143	0.651	0.152
CTLA4	1.95117	2.33356e-143	6.62894e-139	0.553	0.077
CCL4L2	1.92046	2.23649e-25	6.35319e-21	0.157	0.035
DNAJB1	1.89759	1.35388e-94	3.84597e-90	0.814	0.65
TENT5C	1.88556	1.08244e-153	3.07489e-149	0.65	0.154
GAPDH	1.84911	5.93E-323	1.68E-318	0.994	0.949
NR4A1	1.84825	1.17112e-93	3.32681e-89	0.303	0.006
GZMB	1.84212	9.25211e-66	2.62825e-61	0.263	0.023
HSP90AA1	1.80411	1.54902e-104	4.40029e-100	0.919	0.818
BHLHE40	1.74789	1.46935e-151	4.17399e-147	0.789	0.365
DUSP2	1.73669	1.53807e-112	4.36919e-108	0.686	0.268
UBE2S	1.72389	3.34663e-150	9.50678e-146	0.685	0.219
IFNG	1.71288	2.49643e-68	7.0916e-64	0.316	0.042
ZNF331	1.71092	4.9444e-122	1.40456e-117	0.513	0.1
TNFAIP3	1.6925	4.82222e-205	1.36985e-200	0.952	0.659
ZFP36	1.64696	6.31937e-114	1.79514e-109	0.846	0.752
SLC7A5	1.62092	2.70525e-133	7.68482e-129	0.58	0.12
HSPA8	1.60121	1.68925e-134	4.79866e-130	0.928	0.879
HSPH1	1.59972	4.06926e-71	1.15595e-66	0.398	0.095
ADGRE5	1.56382	8.66448e-110	2.46132e-105	0.651	0.263
CSRNP1	1.54152	6.79376e-118	1.9299e-113	0.604	0.176
ID2	1.53111	1.87759e-94	5.33367e-90	0.578	0.195
PHLDA1	1.53004	5.2894e-82	1.50256e-77	0.423	0.088
CXCR4	1.49544	2.51322e-122	7.1393e-118	0.864	0.635
SAMSN1	1.48553	2.63653e-127	7.48958e-123	0.724	0.331
HLA-DRB1	1.47951	1.42414e-106	4.04556e-102	0.772	0.391
XCL1	1.47182	4.17782e-36	1.18679e-31	0.159	0.014
HSP90AB1	1.46771	3.57801e-131	1.01641e-126	0.925	0.82
SNX9	1.46766	3.34958e-93	9.51516e-89	0.473	0.11
MYADM	1.46374	5.10139e-88	1.44915e-83	0.627	0.302
HSPE1	1.45244	2.12252e-79	6.02944e-75	0.646	0.343
SLC2A3	1.43179	2.68559e-115	7.62896e-111	0.742	0.427
HSPA6	1.41802	9.07965e-15	2.57926e-10	0.044	0
LGALS1	1.41251	1.68582e-63	4.78892e-59	0.634	0.352
SCGB3A2	1.4116	7.17229e-59	2.03743e-54	0.178	0
METRNL	1.40332	3.87395e-103	1.10047e-98	0.407	0.04
CDKN1A	1.39993	1.36016e-88	3.86381e-84	0.458	0.086
DUSP5	1.39076	8.49408e-108	2.41291e-103	0.414	0.039
CRIP1	1.38398	6.07641e-151	1.72613e-146	0.97	0.916
TSC22D3	1.37954	2.71782e-111	7.7205e-107	0.867	0.586
YPEL5	1.37623	1.5614e-111	4.43548e-107	0.724	0.371
NR4A3	1.36021	2.81242e-119	7.98925e-115	0.353	0.002
UBB	1.35581	1.93314e-153	5.49148e-149	0.914	0.68
MCL1	1.35358	2.26263e-124	6.42746e-120	0.828	0.571
TPI1	1.35177	1.09024e-93	3.09704e-89	0.795	0.609
LDHA	1.35121	5.94153e-160	1.68781e-155	0.902	0.736
CD74	1.35021	1.01581e-127	2.88561e-123	0.963	0.875
ITM2A	1.34968	5.28771e-97	1.50208e-92	0.748	0.454
JUND	1.32805	1.46512e-188	4.16195e-184	0.989	0.897
DDIT4	1.31684	1.89943e-61	5.3957e-57	0.443	0.15
TNFRSF18	1.29583	5.00865e-72	1.42281e-67	0.295	0.026
HLA-DRA	1.28745	1.50839e-70	4.28489e-66	0.555	0.201
TNF	1.26279	3.22437e-19	9.15947e-15	0.199	0.078
FABP5	1.25959	1.50259e-73	4.2684e-69	0.353	0.055
ATP1B3	1.25146	1.77808e-78	5.05098e-74	0.482	0.165
PDE4B	1.22319	2.28912e-79	6.50269e-75	0.558	0.22
FOSL2	1.21715	1.93399e-81	5.49389e-77	0.421	0.095
KPNA2	1.21421	5.9126e-94	1.67959e-89	0.391	0.045
JUNB	1.21329	9.42573e-62	2.67757e-57	0.879	0.773
PLIN2	1.20617	1.66812e-60	4.73863e-56	0.52	0.255
HSPD1	1.18594	2.75514e-46	7.82654e-42	0.467	0.255
SOCS1	1.18176	8.05569e-64	2.28838e-59	0.399	0.106
UBC	1.17545	1.32462e-216	3.76286e-212	0.996	0.993
HLA-DRB5	1.17376	7.60258e-68	2.15966e-63	0.592	0.248
GZMA	1.1652	2.88595e-67	8.19811e-63	0.77	0.569
CXCR6	1.16458	7.81362e-64	2.21961e-59	0.478	0.161
PER1	1.16151	1.72491e-79	4.89995e-75	0.438	0.103
MTHFD2	1.15706	5.57028e-74	1.58235e-69	0.382	0.076
HSPB1	1.15683	2.46892e-53	7.01347e-49	0.49	0.248
PDCL3	1.14717	1.1888e-69	3.37704e-65	0.45	0.145
RNF19A	1.13731	1.96536e-75	5.58299e-71	0.588	0.288
G3BP2	1.13373	4.46235e-77	1.26762e-72	0.656	0.368
HLA-DQA1	1.13115	3.99899e-60	1.13599e-55	0.331	0.059
RBPJ	1.12554	1.03068e-70	2.92785e-66	0.582	0.268
PFKFB3	1.12221	7.61563e-66	2.16337e-61	0.415	0.112
GZMH	1.11381	2.03939e-47	5.79329e-43	0.31	0.068
ELF1	1.1071	2.6046e-78	7.3989e-74	0.676	0.438
TNFRSF4	1.10393	3.5676e-40	1.01345e-35	0.241	0.057
PDE4D	1.0937	1.06779e-52	3.03326e-48	0.399	0.146
ALOX5AP	1.08731	1.53658e-92	4.36496e-88	0.851	0.717
EIF4A3	1.08445	5.31592e-68	1.51009e-63	0.487	0.177
NKG7	1.08374	2.364e-14	6.7154e-10	0.258	0.146
BATF	1.08342	1.21716e-49	3.45759e-45	0.481	0.222
CCL3	1.07683	6.6029e-22	1.87569e-17	0.084	0.003
ARID5B	1.07338	1.96724e-63	5.58834e-59	0.538	0.247
CKLF	1.06376	9.88642e-70	2.80843e-65	0.724	0.548
IER5L	1.05738	1.78487e-55	5.07027e-51	0.23	0.018
LDLRAD4	1.05638	2.65185e-53	7.53311e-49	0.418	0.153
GNA15	1.05329	4.33306e-76	1.23089e-71	0.323	0.034
GEM	1.05275	1.03816e-48	2.94909e-44	0.149	0
MAP3K8	1.04834	1.64069e-59	4.66072e-55	0.323	0.069
GSPT1	1.04018	1.70308e-71	4.83793e-67	0.629	0.352
EZR	1.03981	3.24694e-83	9.22357e-79	0.83	0.695
ZEB2	1.0325	3.93107e-59	1.1167e-54	0.351	0.076
HIF1A	1.03156	8.53123e-54	2.42347e-49	0.5	0.257
FTH1	1.0188	2.81775e-61	8.00438e-57	0.997	0.999
MT2A	1.01851	6.31544e-21	1.79403e-16	0.442	0.297
CAPG	1.01719	4.85754e-46	1.37988e-41	0.378	0.15
NEU1	1.01457	1.91929e-39	5.45213e-35	0.284	0.086
GNG2	1.01156	3.61967e-70	1.02824e-65	0.618	0.338
PTPN22	1.00583	5.10236e-63	1.44943e-58	0.453	0.16
ICOS	1.0042	1.95567e-56	5.55548e-52	0.371	0.111
FOS	0.986664	1.90347e-22	5.40719e-18	0.52	0.312
VIM	0.98622	4.65078e-63	1.32115e-58	0.981	0.967
CKS2	0.982962	4.25088e-61	1.20755e-56	0.286	0.037
EGR1	0.981746	2.82273e-24	8.01853e-20	0.192	0.048
ENO1	0.979566	8.86175e-62	2.51736e-57	0.723	0.565
REL	0.9708	3.06262e-52	8.7e-48	0.458	0.205
PRDM1	0.969806	6.06128e-40	1.72183e-35	0.429	0.211
BAG3	0.963355	5.11928e-29	1.45423e-24	0.284	0.119
CTSD	0.960786	4.2988e-62	1.22116e-57	0.611	0.37
PTGER4	0.959155	1.12757e-46	3.2031e-42	0.52	0.303
PKM	0.951549	3.39635e-51	9.64801e-47	0.743	0.605
RHOB	0.948168	2.12155e-48	6.02669e-44	0.205	0.017
ZC3H12A	0.946498	3.94518e-46	1.12071e-41	0.345	0.11
CORO1B	0.944145	1.93094e-45	5.48522e-41	0.522	0.3
PGAM1	0.935354	8.88965e-60	2.52528e-55	0.665	0.473
RHOC	0.929595	2.92969e-59	8.32237e-55	0.411	0.13
CYCS	0.92719	4.25079e-60	1.20752e-55	0.583	0.346
GADD45G	0.926892	1.46801e-45	4.17017e-41	0.218	0.026
LAG3	0.926634	7.3263e-25	2.08118e-20	0.211	0.093
NR3C1	0.916797	5.56897e-60	1.58198e-55	0.751	0.555
CITED2	0.915937	5.09464e-32	1.44724e-27	0.531	0.334
FAM177A1	0.914395	2.07995e-53	5.90851e-49	0.5	0.252
TIGIT	0.90874	1.40999e-34	4.00536e-30	0.232	0.061
H3F3B	0.908035	3.84813e-131	1.09314e-126	0.994	0.975
ANXA1	0.902722	1.13523e-87	3.22485e-83	0.745	0.899
PGK1	0.899599	9.12703e-72	2.59272e-67	0.835	0.741
DYNLL1	0.899334	2.56686e-55	7.29167e-51	0.612	0.412
SFPQ	0.89687	4.10576e-67	1.16632e-62	0.718	0.55
G0S2	0.891831	3.41565e-17	9.70284e-13	0.063	0.002
RGS2	0.887072	6.5567e-35	1.86256e-30	0.317	0.112
AHR	0.881064	2.26978e-44	6.44777e-40	0.387	0.152
ETF1	0.874069	2.8628e-58	8.13234e-54	0.398	0.116
TUBB4B	0.872352	3.24408e-41	9.21546e-37	0.556	0.352
ZNRF1	0.867051	2.47488e-46	7.03038e-42	0.344	0.103
NAMPT	0.86677	3.14617e-50	8.93732e-46	0.309	0.069
CD69	0.86231	1.68274e-27	4.78015e-23	0.731	0.604
SRSF2	0.858199	7.15353e-59	2.0321e-54	0.677	0.493
HERPUD1	0.856431	2.00102e-46	5.68429e-42	0.56	0.334
ODC1	0.852451	2.52988e-38	7.18663e-34	0.428	0.211
CEMIP2	0.850874	3.52605e-51	1.00165e-46	0.302	0.061
LINC01871	0.849165	1.89915e-29	5.39491e-25	0.369	0.199
CLIC1	0.847848	2.38416e-78	6.7727e-74	0.884	0.753
STK17B	0.84507	3.84014e-58	1.09087e-53	0.779	0.568
DDX3X	0.842131	4.28964e-49	1.21856e-44	0.635	0.452
DNAJB6	0.834859	2.38084e-50	6.76327e-46	0.558	0.323
BCL3	0.83429	2.70886e-40	7.69507e-36	0.418	0.183
ARID5A	0.83419	6.57449e-45	1.86762e-40	0.503	0.328
SAT1	0.828709	2.76145e-33	7.84444e-29	0.647	0.493
MIR4435-2HG	0.825523	7.82447e-45	2.2227e-40	0.307	0.078
CST7	0.822329	2.02628e-31	5.75604e-27	0.691	0.526
SDCBP	0.821169	7.86704e-40	2.23479e-35	0.456	0.236
AL133415.1	0.816504	4.89927e-31	1.39174e-26	0.5	0.349
SELENOK	0.815486	2.41928e-58	6.87245e-54	0.666	0.469
ITGAE	0.814355	4.13376e-33	1.17428e-28	0.36	0.175
SFTPB	0.81221	2.19736e-43	6.24204e-39	0.133	0
CD63	0.808926	1.16443e-45	3.3078e-41	0.562	0.319
TRBV29-1	0.806635	6.92928e-07	0.019684	0.06	0.017
NAB1	0.802574	1.03697e-47	2.94571e-43	0.21	0.021
STAT3	0.802283	9.06785e-45	2.5759e-40	0.587	0.422
TAGLN2	0.799952	3.54163e-62	1.00607e-57	0.888	0.819
VPS37B	0.79892	8.31149e-42	2.36104e-37	0.398	0.188
HLA-DPA1	0.79759	3.72345e-46	1.05772e-41	0.732	0.541
S100A4	0.795724	6.83867e-73	1.94266e-68	0.975	0.938
ZBTB1	0.793296	1.32276e-38	3.75758e-34	0.372	0.159
CACYBP	0.788805	1.53607e-38	4.3635e-34	0.518	0.344
H2AFZ	0.787476	6.9431e-44	1.97233e-39	0.726	0.643
CYTOR	0.78719	1.26091e-37	3.58186e-33	0.578	0.364
ZNF267	0.783106	3.09994e-41	8.80599e-37	0.435	0.211
MYL6	0.781368	4.62534e-102	1.31392e-97	0.969	0.961
CYTIP	0.781213	2.50467e-51	7.11501e-47	0.722	0.578
TXN	0.780555	2.37963e-44	6.75981e-40	0.657	0.476
IFRD1	0.778079	9.14294e-39	2.59724e-34	0.373	0.168
CFL1	0.76425	1.3419e-106	3.81193e-102	0.978	0.967
PPP1R15A	0.76294	2.49693e-32	7.09303e-28	0.719	0.521
IDI1	0.759676	2.33944e-38	6.64564e-34	0.354	0.152
CCNH	0.759096	6.60494e-37	1.87626e-32	0.527	0.395
GADD45B	0.756322	7.53934e-19	2.1417e-14	0.302	0.183
SERTAD1	0.756118	3.33014e-35	9.45992e-31	0.274	0.086
MAF	0.755229	2.32126e-30	6.594e-26	0.349	0.168
PTTG1	0.753521	1.21726e-38	3.45786e-34	0.288	0.079
NFIL3	0.753337	1.47682e-38	4.19521e-34	0.19	0.025
SLC38A2	0.745186	4.24634e-34	1.20626e-29	0.432	0.222
ITGB2	0.743485	7.98425e-48	2.26809e-43	0.802	0.652
INSIG1	0.739514	1.37208e-35	3.89766e-31	0.306	0.103
SIRPG	0.734425	2.36741e-38	6.7251e-34	0.214	0.04
NFKBIZ	0.732129	2.69828e-21	7.665e-17	0.356	0.238
AL135905.2	0.731306	9.76757e-35	2.77467e-30	0.357	0.156
IVNS1ABP	0.726169	3.23569e-33	9.19162e-29	0.421	0.256
MIF	0.725833	2.84501e-55	8.08181e-51	0.908	0.883
HLA-DQB1	0.725267	1.04865e-29	2.97889e-25	0.376	0.168
CD83	0.723674	9.30965e-30	2.64459e-25	0.185	0.039
SNHG15	0.723497	3.65576e-35	1.03849e-30	0.29	0.092
BTG1	0.721584	1.43075e-66	4.06433e-62	0.988	0.976
RBM8A	0.719334	1.65044e-44	4.6884e-40	0.67	0.473
TNFRSF1B	0.717105	2.5812e-38	7.33243e-34	0.528	0.33
PTMS	0.716335	4.73556e-30	1.34523e-25	0.196	0.048
NFKBIA	0.7144	3.98566e-27	1.13221e-22	0.796	0.66
COTL1	0.708303	6.43015e-48	1.82661e-43	0.85	0.752
BRD2	0.707511	1.18929e-34	3.37841e-30	0.631	0.466
RAB11FIP1	0.701386	1.23401e-29	3.50544e-25	0.27	0.1
NEDD9	0.700842	3.32429e-30	9.4433e-26	0.285	0.114
ENTPD1	0.699333	7.80025e-33	2.21582e-28	0.156	0.018
XCL2	0.694683	1.77928e-19	5.0544e-15	0.076	0.003
SYTL3	0.69197	9.25163e-29	2.62811e-24	0.35	0.161
NMB	0.691666	9.88931e-26	2.80926e-21	0.186	0.046
H2AFX	0.691417	2.45929e-34	6.98611e-30	0.261	0.076
TMSB10	0.689009	4.56535e-72	1.29688e-67	0.998	0.998
CTSW	0.685893	5.60445e-23	1.59206e-18	0.216	0.191
HCST	0.685779	9.17085e-47	2.60516e-42	0.831	0.683
TOB1	0.685301	4.6101e-27	1.30959e-22	0.389	0.223
AMD1	0.680644	9.79385e-32	2.78214e-27	0.406	0.216
ARL6IP5	0.675577	3.90895e-51	1.11042e-46	0.796	0.689
GTF2B	0.675499	5.58029e-31	1.58519e-26	0.431	0.237
TIPARP	0.674302	8.96436e-26	2.5465e-21	0.358	0.182
JPT1	0.673291	2.90532e-33	8.25315e-29	0.494	0.297
CD96	0.671639	1.66565e-38	4.73161e-34	0.677	0.489
TYMP	0.671436	1.42537e-25	4.04906e-21	0.358	0.178
TOX	0.671427	1.13754e-30	3.23142e-26	0.214	0.05
KLRB1	0.664037	2.41417e-14	6.85794e-10	0.373	0.286
SMAP2	0.662638	2.16829e-32	6.15946e-28	0.553	0.418
ABCG1	0.662332	3.82586e-49	1.08681e-44	0.201	0.015
ANKRD28	0.65881	1.00845e-27	2.86469e-23	0.237	0.078
TOX2	0.658137	2.1483e-48	6.10267e-44	0.172	0.005
IFITM3	0.65617	1.14494e-27	3.25244e-23	0.52	0.354
MAPRE2	0.655115	8.53641e-30	2.42494e-25	0.385	0.198
SLA	0.652831	4.48802e-22	1.27491e-17	0.309	0.162
EIF4A1	0.648077	5.07669e-46	1.44213e-41	0.822	0.699
IRF1	0.647073	1.11589e-24	3.16992e-20	0.611	0.452
RASGEF1B	0.646799	1.00379e-30	2.85148e-26	0.17	0.029
BIRC3	0.64424	2.08473e-23	5.92211e-19	0.38	0.233
PELI1	0.641804	3.84183e-28	1.09135e-23	0.239	0.078
PIM3	0.640617	4.4198e-25	1.25553e-20	0.405	0.248
GPR25	0.64041	1.09243e-26	3.10326e-22	0.2	0.049
KDM6B	0.639043	3.77186e-24	1.07147e-19	0.277	0.127
IL2RG	0.638296	3.85559e-59	1.09526e-54	0.936	0.914
HLA-DQA2	0.637594	1.10158e-27	3.12927e-23	0.189	0.041
ADAM19	0.63591	3.59849e-31	1.02222e-26	0.276	0.088
NFE2L2	0.63261	1.73277e-28	4.92228e-24	0.429	0.275
FAS	0.632525	2.84206e-24	8.07344e-20	0.358	0.205
IQGAP1	0.630257	1.22886e-36	3.49083e-32	0.674	0.521
PDCD1	0.623915	1.81915e-26	5.16765e-22	0.165	0.031
CD2	0.623836	1.62217e-47	4.6081e-43	0.91	0.884
ZFAND5	0.623808	2.5313e-28	7.19065e-24	0.439	0.26
NEAT1	0.620734	5.17455e-23	1.46993e-18	0.538	0.412
CCND2	0.618347	1.50186e-26	4.26633e-22	0.376	0.208
CAPZB	0.61699	8.61844e-47	2.44824e-42	0.766	0.659
HSPA5	0.61512	1.57354e-34	4.46996e-30	0.747	0.677
ACTN4	0.613299	4.75145e-34	1.34975e-29	0.65	0.502
PMEPA1	0.612373	4.96725e-26	1.41105e-21	0.269	0.094
JMY	0.61177	4.40303e-24	1.25077e-19	0.3	0.152
TUBA4A	0.609998	9.33463e-28	2.65169e-23	0.578	0.546
FOXO1	0.606962	1.89174e-24	5.37387e-20	0.409	0.26
IL32	0.60647	4.59175e-43	1.30438e-38	0.992	0.997
RALA	0.606002	9.56081e-25	2.71594e-20	0.345	0.183
HSPA9	0.605193	1.37312e-27	3.90064e-23	0.478	0.301
GADD45A	0.597704	1.85053e-26	5.2568e-22	0.191	0.046
SLC25A5	0.59712	1.52072e-30	4.31991e-26	0.609	0.461
BZW1	0.595988	6.67768e-33	1.89693e-28	0.623	0.482
HNRNPA3	0.595577	1.18263e-34	3.35949e-30	0.731	0.574
HEXIM1	0.595298	2.8612e-29	8.12782e-25	0.207	0.051
YWHAQ	0.595158	2.80855e-25	7.97825e-21	0.723	0.657
STX11	0.593221	7.34829e-28	2.08743e-23	0.21	0.056
ARL4A	0.592354	5.42109e-20	1.53997e-15	0.288	0.152
RNF139	0.592029	1.0927e-25	3.10404e-21	0.342	0.18
CBLB	0.589317	2.08665e-25	5.92755e-21	0.397	0.262
RBM38	0.585483	1.93439e-22	5.49501e-18	0.443	0.319
RGS16	0.585369	1.41995e-20	4.03365e-16	0.137	0.027
MT1E	0.584634	4.28349e-18	1.21681e-13	0.15	0.042
COX8A	0.584326	4.08472e-35	1.16035e-30	0.715	0.602
CALR	0.584045	7.42207e-36	2.10839e-31	0.756	0.68
ANKRD37	0.582695	5.27412e-32	1.49822e-27	0.169	0.023
TNFSF9	0.582247	6.14629e-24	1.74598e-19	0.119	0.014
CD38	0.580219	7.29662e-41	2.07275e-36	0.125	0
SYAP1	0.580204	2.71604e-24	7.71547e-20	0.287	0.121
SIK3	0.580069	1.55256e-24	4.41035e-20	0.397	0.233
AC243829.4	0.579608	1.30587e-33	3.70958e-29	0.113	0.001
NAA50	0.578761	4.60355e-22	1.30773e-17	0.405	0.246
FRMD4B	0.576107	8.02205e-22	2.27882e-17	0.185	0.073
BTG3	0.575792	1.96089e-23	5.57029e-19	0.316	0.153
NASP	0.575775	2.49127e-24	7.07694e-20	0.416	0.269
SLC1A5	0.571428	3.16127e-23	8.98021e-19	0.256	0.108
CD53	0.571412	2.01269e-36	5.71746e-32	0.68	0.57
SLC16A3	0.56949	4.20049e-27	1.19323e-22	0.202	0.055
POLR2A	0.568139	5.43866e-21	1.54496e-16	0.369	0.228
GPI	0.567864	2.02425e-28	5.75027e-24	0.526	0.383
TESC	0.566562	3.33312e-28	9.46839e-24	0.193	0.042
TRPS1	0.564754	1.00334e-24	2.85017e-20	0.212	0.066
IRF4	0.564608	6.72365e-34	1.90999e-29	0.145	0.01
APOBEC3H	0.563903	2.17527e-21	6.17928e-17	0.254	0.114
IGFLR1	0.562171	2.09672e-23	5.95616e-19	0.387	0.294
TUBB2A	0.561642	1.2279e-25	3.48808e-21	0.146	0.024
CHST11	0.561282	4.75065e-22	1.34952e-17	0.371	0.215
CTSC	0.561049	6.14999e-21	1.74703e-16	0.523	0.373
NFKB1	0.560917	4.50584e-20	1.27997e-15	0.348	0.223
HLA-DMA	0.560435	7.2351e-22	2.05527e-17	0.265	0.105
SGK1	0.560124	5.87689e-17	1.66945e-12	0.139	0.037
NOP58	0.557146	3.42899e-21	9.74074e-17	0.423	0.297
VDAC1	0.554905	4.8468e-22	1.37683e-17	0.433	0.277
HNRNPLL	0.55417	1.62226e-22	4.60837e-18	0.436	0.302
PFN1	0.554063	1.54203e-48	4.38043e-44	0.988	0.997
DUSP10	0.553767	5.61087e-22	1.59388e-17	0.205	0.072
AC006064.4	0.553271	4.50755e-30	1.28046e-25	0.188	0.038
RELB	0.551433	5.46465e-20	1.55234e-15	0.317	0.168
ARHGAP9	0.551352	3.09343e-23	8.78751e-19	0.485	0.339
CNOT6L	0.550761	2.73386e-22	7.76609e-18	0.345	0.192
RHBDD2	0.548336	1.65357e-21	4.69729e-17	0.369	0.227
KLF6	0.547915	1.08128e-19	3.07158e-15	0.898	0.888
ZFAND2A	0.547801	2.92725e-16	8.31545e-12	0.234	0.117
ANXA5	0.547404	9.00349e-25	2.55762e-20	0.571	0.413
CDK17	0.546882	1.17842e-20	3.34754e-16	0.412	0.273
SUB1	0.546071	1.11844e-41	3.17716e-37	0.798	0.73
CHMP1B	0.546054	5.73006e-22	1.62774e-17	0.251	0.118
LEPROTL1	0.543637	7.02794e-29	1.99643e-24	0.71	0.64
CD3D	0.54219	4.05109e-35	1.15079e-30	0.897	0.858
ELL2	0.541828	7.41261e-27	2.1057e-22	0.185	0.043
UBE2A	0.541463	2.76283e-21	7.84838e-17	0.337	0.182
NINJ1	0.538688	6.81486e-20	1.9359e-15	0.267	0.145
HMGB2	0.538251	3.86534e-23	1.09803e-18	0.535	0.45
PPP1R16B	0.535035	2.91829e-22	8.29e-18	0.414	0.269
SPOCK2	0.529522	1.98263e-30	5.63205e-26	0.779	0.756
JMJD1C	0.527267	3.17651e-21	9.0235e-17	0.391	0.267
EIF5	0.525398	1.12784e-26	3.20386e-22	0.65	0.534
SH3BGRL3	0.523033	1.55144e-44	4.40717e-40	0.99	1
FKBP1A	0.522779	1.55217e-23	4.40924e-19	0.457	0.349
EGR2	0.522036	1.27358e-25	3.61786e-21	0.097	0.003
DNTTIP2	0.519748	3.76512e-23	1.06956e-18	0.444	0.316
TPM4	0.519455	3.46001e-19	9.82884e-15	0.498	0.338
DDX24	0.518619	6.64667e-29	1.88812e-24	0.737	0.657
TUBA1A	0.518597	1.35815e-16	3.8581e-12	0.562	0.515
NXT1	0.517797	2.97828e-19	8.4604e-15	0.292	0.178
NDUFS5	0.517457	7.21276e-34	2.04893e-29	0.762	0.67
BCAS2	0.516224	2.91848e-21	8.29052e-17	0.411	0.257
HLA-DPB1	0.514094	4.84645e-22	1.37673e-17	0.675	0.541
ARF4	0.511356	1.63713e-23	4.65058e-19	0.462	0.333
GRAMD1B	0.510748	1.23781e-25	3.51623e-21	0.203	0.056
JMJD6	0.510002	4.71403e-21	1.33911e-16	0.245	0.112
MYH9	0.509324	3.18607e-32	9.05068e-28	0.846	0.787
PRDX1	0.508428	9.12194e-27	2.59127e-22	0.593	0.51
PPP1R15B	0.507651	1.85125e-20	5.25886e-16	0.231	0.104
AKIRIN2	0.505828	1.58115e-20	4.49156e-16	0.411	0.287
PSME2	0.505826	1.83008e-28	5.1987e-24	0.665	0.555
HMGN1	0.503437	5.3555e-21	1.52134e-16	0.635	0.506
ZFP36L2	0.503205	1.96773e-24	5.58974e-20	0.855	0.892
NDFIP2	0.502913	2.68593e-27	7.62992e-23	0.145	0.021
CLEC2B	0.502149	2.54916e-21	7.2414e-17	0.475	0.415
ZBED2	0.502021	1.61411e-34	4.58519e-30	0.106	0
MYLIP	0.501479	6.77255e-18	1.92388e-13	0.273	0.148
KLF10	0.501079	4.76837e-20	1.35455e-15	0.212	0.072
SCGB3A1	0.500564	6.32106e-33	1.79562e-28	0.111	0.001
PPP2CA	0.500476	9.70413e-25	2.75665e-20	0.501	0.365
CD82	0.500415	3.79331e-21	1.07757e-16	0.507	0.402
EML4	0.500309	2.44377e-28	6.94201e-24	0.669	0.604
LDLR	0.499811	1.52798e-22	4.34054e-18	0.145	0.032
SNRPB	0.499415	1.10374e-22	3.1354e-18	0.593	0.461
CALM2	0.497351	3.05663e-35	8.68297e-31	0.819	0.775
ATP6V0C	0.4962	1.08691e-25	3.08759e-21	0.686	0.578
GPRIN3	0.494493	4.99917e-19	1.42011e-14	0.324	0.204
ARL6IP1	0.494276	1.4568e-20	4.13834e-16	0.589	0.475
IER5	0.493874	8.31901e-14	2.36318e-09	0.349	0.224
PARD6G	0.493865	1.18686e-32	3.37152e-28	0.119	0.003
MT1X	0.493299	1.15963e-12	3.29417e-08	0.267	0.183
RFTN1	0.492126	3.17902e-17	9.03065e-13	0.316	0.182
RHOH	0.491341	5.63784e-19	1.60154e-14	0.537	0.423
STMN1	0.491112	3.57691e-08	0.00101609	0.164	0.098
PPP1CB	0.490853	6.34692e-21	1.80297e-16	0.402	0.302
HNRNPAB	0.490232	2.49772e-18	7.09528e-14	0.354	0.216
RAB8B	0.489926	3.87136e-19	1.09974e-14	0.307	0.181
TM2D3	0.489466	1.10997e-20	3.15308e-16	0.272	0.129
SMAD7	0.488433	4.25944e-15	1.20998e-10	0.37	0.254
IDS	0.487884	5.01413e-20	1.42436e-15	0.703	0.608
SCGB1A1	0.485079	1.70245e-28	4.83614e-24	0.088	0
C17orf49	0.484589	4.63826e-15	1.31759e-10	0.429	0.327
NSMCE3	0.4828	1.8534e-17	5.26494e-13	0.442	0.325
MSN	0.481349	6.6477e-28	1.88841e-23	0.786	0.709
FURIN	0.480338	3.606e-18	1.02436e-13	0.17	0.061
IRS2	0.478991	2.17872e-18	6.18908e-14	0.167	0.053
PBX4	0.478683	8.47645e-18	2.40791e-13	0.271	0.158
JARID2	0.477874	9.74313e-17	2.76773e-12	0.203	0.1
RDH10	0.477796	6.9828e-20	1.9836e-15	0.107	0.015
SOD2	0.476842	1.66626e-13	4.73333e-09	0.323	0.231
GLS	0.475597	7.5738e-18	2.15149e-13	0.418	0.317
JOSD1	0.475415	2.83586e-19	8.05583e-15	0.221	0.092
PMAIP1	0.474135	1.80413e-10	5.125e-06	0.178	0.092
AREG	0.473429	1.00391e-21	2.8518e-17	0.105	0.011
PHPT1	0.472765	4.29892e-16	1.22119e-11	0.309	0.19
FAM102B	0.471302	3.49466e-16	9.92727e-12	0.271	0.141
SQSTM1	0.470265	7.35597e-20	2.08961e-15	0.622	0.585
CHCHD2	0.469349	1.08434e-34	3.08028e-30	0.848	0.805
OAT	0.468361	1.40748e-18	3.99823e-14	0.25	0.124
PLK3	0.467997	3.57374e-15	1.01519e-10	0.363	0.263
ACTB	0.467842	3.78186e-42	1.07431e-37	1	1
CD27	0.46653	7.8795e-12	2.23833e-07	0.183	0.124
TPM3	0.466321	1.55404e-32	4.41457e-28	0.841	0.794
LINC01578	0.465887	1.78602e-28	5.07354e-24	0.79	0.755
ITGB1	0.464942	1.32079e-16	3.75198e-12	0.703	0.584
SPTY2D1	0.464499	1.23353e-16	3.5041e-12	0.247	0.135
AKAP13	0.463922	1.20463e-18	3.42198e-14	0.613	0.511
LYST	0.463805	1.63038e-15	4.63143e-11	0.233	0.142
TAB2	0.461524	5.81541e-15	1.65198e-10	0.341	0.243
LINC-PINT	0.461145	9.60396e-18	2.7282e-13	0.202	0.081
MAT2A	0.460981	8.27182e-15	2.34977e-10	0.324	0.213
MAP2K3	0.460586	3.25491e-17	9.24623e-13	0.287	0.159
JUN	0.45949	2.42295e-18	6.88286e-14	0.87	0.722
RNF125	0.459011	1.79727e-14	5.1055e-10	0.3	0.201
CMC2	0.458933	6.79448e-18	1.93011e-13	0.352	0.221
ARL4C	0.457722	1.08769e-24	3.0898e-20	0.8	0.794
MAP1LC3A	0.457692	3.78351e-25	1.07478e-20	0.118	0.013
TMEM70	0.457564	2.08284e-18	5.91672e-14	0.227	0.104
MYO7A	0.457389	8.97223e-31	2.54874e-26	0.109	0.002
TSPYL2	0.457183	1.30645e-11	3.71124e-07	0.285	0.215
NARF	0.453045	1.12911e-15	3.20747e-11	0.287	0.165
PPA1	0.452888	2.534e-14	7.19833e-10	0.328	0.238
AHI1	0.45271	1.34312e-16	3.81539e-12	0.167	0.061
PTMA	0.452417	4.59299e-48	1.30473e-43	1	1
CDV3	0.451677	1.27407e-18	3.61924e-14	0.538	0.436
RANBP2	0.451405	3.66795e-18	1.04196e-13	0.334	0.237
CSF2	0.45114	1.48855e-14	4.22852e-10	0.043	0
GLUL	0.45052	3.7632e-12	1.06901e-07	0.241	0.183
SOD1	0.449509	4.12947e-22	1.17306e-17	0.747	0.691
TGFB1	0.449363	4.51038e-29	1.28126e-24	0.78	0.833
ICAM1	0.447659	2.42109e-16	6.87758e-12	0.146	0.048
PHTF2	0.447605	1.76105e-14	5.0026e-10	0.293	0.176
CTSL	0.446552	1.06158e-11	3.01564e-07	0.16	0.068
ARHGDIB	0.445319	7.72789e-41	2.19526e-36	0.973	0.981
IL2RB	0.442637	3.76638e-13	1.06992e-08	0.422	0.315
FKBP5	0.442465	6.7122e-15	1.90673e-10	0.29	0.201
PTPN1	0.441921	2.19726e-16	6.24175e-12	0.354	0.257
ATP1B1	0.440584	4.68607e-20	1.33117e-15	0.127	0.025
MAPK1IP1L	0.438724	5.89059e-17	1.67334e-12	0.489	0.386
PSMB6	0.437356	5.06786e-18	1.43963e-13	0.48	0.36
CTSH	0.436825	1.92134e-14	5.45795e-10	0.27	0.172
TANK	0.432814	4.07173e-15	1.15666e-10	0.367	0.264
MIR155HG	0.432145	9.3191e-14	2.64728e-09	0.139	0.049
MIDN	0.431464	3.39918e-13	9.65604e-09	0.297	0.193
DNPH1	0.430954	4.8712e-13	1.38376e-08	0.334	0.237
KDM5B	0.430538	2.32273e-15	6.59818e-11	0.198	0.092
YWHAZ	0.429998	2.97891e-34	8.46218e-30	0.925	0.924
SRGAP3	0.428382	1.08843e-28	3.09192e-24	0.102	0.002
GUK1	0.427431	4.12536e-21	1.17189e-16	0.698	0.593
GPR183	0.425117	4.06242e-17	1.15401e-12	0.35	0.338
LINC01943	0.424641	9.57128e-09	0.000271891	0.252	0.201
CTSB	0.423444	2.25009e-16	6.39183e-12	0.532	0.46
APOBEC3G	0.422825	1.95158e-16	5.54385e-12	0.507	0.442
CD9	0.421801	6.14278e-23	1.74498e-18	0.099	0.007
DBI	0.421223	2.33143e-20	6.62289e-16	0.557	0.458
CD44	0.42092	7.42543e-21	2.10934e-16	0.855	0.82
BACH1	0.420779	2.93077e-16	8.32543e-12	0.177	0.065
NFKB2	0.419679	4.03594e-12	1.14649e-07	0.249	0.141
CMTM6	0.418933	3.06775e-13	8.71455e-09	0.343	0.233
WNK1	0.418516	4.29925e-14	1.22129e-09	0.443	0.347
SAP18	0.418325	4.4058e-24	1.25156e-19	0.709	0.668
CCR6	0.417531	8.28376e-12	2.35317e-07	0.154	0.094
SARDH	0.417095	2.11403e-22	6.00531e-18	0.115	0.015
USP36	0.417038	9.3845e-13	2.66586e-08	0.301	0.196
PLAAT3	0.416494	6.0682e-14	1.72379e-09	0.194	0.095
PMF1	0.416327	6.4176e-15	1.82305e-10	0.283	0.165
LRRFIP1	0.416101	4.04896e-17	1.15019e-12	0.61	0.532
MAP1LC3B	0.415995	3.62664e-17	1.03022e-12	0.601	0.501
SELENOT	0.414952	1.35856e-18	3.85927e-14	0.473	0.373
ZFP36L1	0.414752	2.08548e-12	5.92423e-08	0.771	0.767
KRT86	0.414236	5.33489e-18	1.51548e-13	0.054	0
NBL1	0.414091	2.34085e-14	6.64967e-10	0.159	0.061
SARAF	0.413727	5.692e-32	1.61693e-27	0.97	0.982
HAVCR2	0.413678	4.30644e-27	1.22333e-22	0.092	0.001
MAP3K2	0.413674	8.134e-12	2.31063e-07	0.316	0.207
APOBEC3C	0.412821	7.13764e-13	2.02759e-08	0.3	0.195
ISCA1	0.412551	1.08152e-12	3.07227e-08	0.309	0.195
ATP6V0D1	0.4124	3.5865e-15	1.01882e-10	0.267	0.146
TLN1	0.412091	3.1143e-17	8.84678e-13	0.512	0.43
GLA	0.411967	7.27403e-18	2.06633e-13	0.12	0.026
SERF2	0.409747	2.60317e-26	7.39482e-22	0.952	0.951
ATF3	0.409634	1.80431e-12	5.1255e-08	0.1	0.029
SLBP	0.409554	4.30229e-13	1.22215e-08	0.315	0.215
RLF	0.409464	3.10215e-15	8.81228e-11	0.215	0.109
EPAS1	0.409083	2.77083e-28	7.87109e-24	0.101	0.002
SYT11	0.409007	3.43096e-13	9.74633e-09	0.252	0.156
SLC16A1	0.40894	2.99508e-18	8.50812e-14	0.13	0.031
CSF1	0.407907	8.16925e-11	2.32064e-06	0.087	0.025
LCP1	0.407866	2.24736e-23	6.38407e-19	0.875	0.858
TFRC	0.40549	1.93571e-13	5.49877e-09	0.179	0.076
STAT4	0.404078	9.77139e-14	2.77576e-09	0.402	0.315
PLPP1	0.403941	8.99393e-16	2.55491e-11	0.121	0.034
ATXN1	0.402199	7.91917e-14	2.2496e-09	0.249	0.132
FNBP1	0.401683	2.78054e-16	7.89868e-12	0.527	0.439
RHOA	0.401657	2.29808e-28	6.52816e-24	0.866	0.842
STRAP	0.401579	2.44809e-14	6.95428e-10	0.401	0.302
ENSA	0.400979	2.00727e-14	5.70206e-10	0.442	0.334
HTRA1	0.400957	5.65757e-22	1.60715e-17	0.081	0.002
LINC00892	0.3992	5.41027e-12	1.5369e-07	0.198	0.094
ROMO1	0.39829	2.13872e-15	6.07545e-11	0.482	0.402
RUNX2	0.398258	6.7923e-13	1.92949e-08	0.251	0.159
EMD	0.397946	1.32346e-12	3.75956e-08	0.44	0.324
ZDBF2	0.396949	1.37341e-15	3.90143e-11	0.139	0.042
ATP2B1	0.396932	1.05065e-10	2.98457e-06	0.31	0.225
IFI27L2	0.396873	8.65433e-13	2.45844e-08	0.36	0.256
SOX4	0.396635	2.13758e-13	6.07222e-09	0.048	0.001
IFITM2	0.395761	1.45556e-16	4.13482e-12	0.761	0.728
NDUFA13	0.395498	3.47265e-24	9.86475e-20	0.739	0.666
AC011611.3	0.394994	2.28944e-18	6.50362e-14	0.102	0.015
CDK6	0.394861	2.2966e-11	6.52394e-07	0.218	0.125
IRF2BP2	0.392694	4.8953e-12	1.39061e-07	0.265	0.168
ADGRG1	0.392601	1.79613e-15	5.10226e-11	0.072	0.008
IL21R	0.392585	1.00001e-12	2.84072e-08	0.189	0.087
ABHD5	0.392224	1.0955e-18	3.11199e-14	0.128	0.03
EFHD2	0.390816	9.19417e-16	2.61179e-11	0.542	0.465
NUP58	0.389334	1.23557e-13	3.50989e-09	0.256	0.143
SURF4	0.388373	8.6869e-14	2.46769e-09	0.422	0.309
CHD1	0.388099	1.32217e-14	3.75588e-10	0.364	0.287
NIBAN1	0.387479	3.83834e-12	1.09036e-07	0.354	0.273
RBM3	0.386657	2.01183e-14	5.715e-10	0.701	0.613
NRBP1	0.386314	4.15224e-13	1.17953e-08	0.378	0.27
SLC25A3	0.385719	2.19625e-20	6.2389e-16	0.662	0.602
BNIP3L	0.384688	1.24197e-11	3.52807e-07	0.336	0.239
MAST4	0.383425	7.88943e-13	2.24115e-08	0.169	0.072
SRSF7	0.383204	3.7138e-15	1.05498e-10	0.717	0.719
MTFP1	0.383048	9.1807e-13	2.60796e-08	0.192	0.088
PTPRJ	0.382721	6.89399e-14	1.95838e-09	0.27	0.184
PELO	0.382198	2.71006e-12	7.69847e-08	0.174	0.074
LAMTOR5	0.381737	1.62941e-13	4.62866e-09	0.384	0.283
KMT2E	0.381717	1.37578e-14	3.90819e-10	0.613	0.553
PTPN7	0.380972	1.74813e-11	4.96591e-07	0.32	0.23
RUNX3	0.380167	7.9087e-11	2.24663e-06	0.28	0.191
UCP2	0.379718	3.61271e-11	1.02626e-06	0.521	0.487
TP53INP2	0.379156	3.60959e-25	1.02538e-20	0.11	0.008
LAPTM4A	0.378227	2.49084e-14	7.07574e-10	0.394	0.303
SLC30A1	0.37809	1.22902e-19	3.49127e-15	0.118	0.019
PNP	0.37807	1.76467e-12	5.01289e-08	0.35	0.299
CHORDC1	0.377882	1.87314e-11	5.32102e-07	0.227	0.138
ITPR1	0.377525	1.88938e-11	5.36716e-07	0.186	0.096
RAN	0.377404	5.24587e-24	1.49019e-19	0.733	0.697
SIAH2	0.377359	1.14544e-11	3.25386e-07	0.267	0.181
LINC00963	0.376974	9.01768e-14	2.56165e-09	0.218	0.133
DSE	0.376828	8.49471e-13	2.41309e-08	0.187	0.098
GOLIM4	0.376416	8.31614e-19	2.36236e-14	0.096	0.013
NUDT14	0.376179	5.06374e-16	1.43846e-11	0.132	0.037
ACP5	0.375979	4.61499e-12	1.31098e-07	0.167	0.076
NUFIP2	0.375405	2.31944e-12	6.58883e-08	0.274	0.186
CRIM1	0.374097	4.69182e-16	1.33281e-11	0.117	0.027
CALM1	0.373745	1.03277e-24	2.93379e-20	0.959	0.962
LGALS3	0.373368	2.03041e-11	5.76778e-07	0.599	0.502
DAPK2	0.373124	6.09641e-14	1.73181e-09	0.151	0.054
TMEM50A	0.373054	5.73693e-20	1.62969e-15	0.651	0.6
CYP51A1	0.372883	6.38544e-14	1.81391e-09	0.156	0.059
CPD	0.372523	1.33993e-11	3.80635e-07	0.218	0.127
TSHZ2	0.371046	1.8476e-12	5.24848e-08	0.138	0.047
SPPL2A	0.370676	1.84278e-12	5.23478e-08	0.242	0.145
COX6A1	0.370518	1.61762e-21	4.59517e-17	0.79	0.74
ARHGAP18	0.370397	7.91313e-15	2.24788e-10	0.165	0.059
WFDC2	0.370163	1.02234e-28	2.90417e-24	0.088	0
POLR2L	0.369943	1.19698e-19	3.40027e-15	0.629	0.585
WDR47	0.369618	3.9506e-16	1.12225e-11	0.152	0.047
FGFR1OP2	0.368549	2.26426e-12	6.43208e-08	0.392	0.288
LRMP	0.368468	4.85026e-16	1.37781e-11	0.141	0.042
TOP1	0.368282	1.61378e-10	4.58427e-06	0.337	0.236
LSP1	0.367639	4.43512e-22	1.25989e-17	0.91	0.897
GLUD1	0.366384	1.83438e-12	5.21093e-08	0.384	0.309
PSMD14	0.365459	7.03366e-14	1.99805e-09	0.219	0.112
BLOC1S1	0.365139	1.84993e-14	5.2551e-10	0.527	0.463
EMC7	0.364713	2.45535e-13	6.97491e-09	0.366	0.271
RAC2	0.364055	8.34651e-23	2.37099e-18	0.855	0.847
GPR137B	0.363861	1.02681e-12	2.91686e-08	0.168	0.076
PERP	0.363094	2.12481e-11	6.03594e-07	0.234	0.164
OXNAD1	0.362105	1.58915e-10	4.51429e-06	0.303	0.216
HIPK1	0.361986	3.16975e-13	9.00431e-09	0.198	0.117
RAB5IF	0.361466	1.16289e-13	3.30341e-09	0.388	0.3
ST8SIA4	0.361382	8.9404e-11	2.5397e-06	0.226	0.137
PRMT9	0.361217	2.0311e-13	5.76976e-09	0.15	0.054
SPATS2L	0.360939	8.1008e-11	2.30119e-06	0.22	0.112
EIF1AX	0.360627	1.66145e-11	4.71968e-07	0.36	0.283
PPIF	0.359577	1.41137e-12	4.00928e-08	0.152	0.062
UAP1	0.359522	2.15683e-11	6.1269e-07	0.179	0.087
ATP10D	0.359339	1.46861e-18	4.17189e-14	0.106	0.018
SYNGR2	0.359307	3.06551e-13	8.70818e-09	0.384	0.317
SRP14	0.359015	1.30342e-27	3.70261e-23	0.883	0.883
RNF145	0.35851	6.96645e-11	1.97896e-06	0.269	0.169
PPDPF	0.358463	6.72023e-17	1.90902e-12	0.797	0.745
POMP	0.358243	1.74133e-12	4.9466e-08	0.467	0.376
USP38	0.358184	8.23193e-13	2.33844e-08	0.183	0.088
NDUFA4	0.357247	3.57454e-25	1.01542e-20	0.755	0.744
AL606807.1	0.35715	1.09653e-21	3.11493e-17	0.088	0.005
ZFYVE28	0.356998	3.62632e-10	1.03013e-05	0.254	0.164
GPBP1	0.35642	1.77559e-12	5.04392e-08	0.399	0.31
CD4	0.356392	3.92358e-12	1.11457e-07	0.535	0.449
KDM2A	0.355637	9.80877e-13	2.78638e-08	0.375	0.31
CSNK1D	0.35553	4.65246e-11	1.32163e-06	0.309	0.213
GPR65	0.35533	4.11852e-11	1.16995e-06	0.314	0.251
FAM160B1	0.354665	6.80141e-11	1.93208e-06	0.216	0.129
SLC6A6	0.351654	9.57225e-14	2.71919e-09	0.178	0.07
UBE2D3	0.351575	5.56038e-20	1.57954e-15	0.708	0.681
PSMA6	0.351364	1.04765e-14	2.97605e-10	0.458	0.395
DOK2	0.350999	2.71839e-08	0.000772213	0.352	0.27
PNPLA8	0.35041	3.62777e-11	1.03054e-06	0.234	0.154
BCL2	0.350194	7.52895e-10	2.13875e-05	0.236	0.138
COX5A	0.349675	8.52891e-15	2.42281e-10	0.502	0.423
RNMT	0.349574	2.0352e-11	5.78139e-07	0.307	0.222
DENND1B	0.347935	3.42901e-12	9.7408e-08	0.185	0.087
SNRPD1	0.346887	1.57208e-12	4.46581e-08	0.339	0.267
DUSP6	0.346575	1.33917e-12	3.80418e-08	0.082	0.018
DBF4	0.346178	2.00699e-10	5.70125e-06	0.203	0.113
EVI2A	0.345805	2.65715e-10	7.54818e-06	0.275	0.2
CEBPD	0.345502	1.05645e-09	3.00106e-05	0.252	0.292
ROCK1	0.344844	4.2633e-09	0.000121108	0.361	0.27
BIRC2	0.344815	1.77157e-10	5.03249e-06	0.251	0.156
ERF	0.343986	8.77957e-12	2.49401e-07	0.154	0.068
MBNL2	0.343406	7.49507e-09	0.000212912	0.243	0.158
TRIB1	0.343082	1.10477e-19	3.13831e-15	0.081	0.005
MT-ATP8	0.342964	9.90304e-14	2.81316e-09	0.851	0.824
SEC14L2	0.3428	2.08665e-18	5.92755e-14	0.094	0.011
SLC27A2	0.342545	8.39285e-21	2.38416e-16	0.1	0.01
STARD7	0.342242	4.6746e-11	1.32791e-06	0.274	0.192
OSER1	0.341231	1.87262e-09	5.31956e-05	0.265	0.168
AC007384.1	0.341228	6.96229e-14	1.97778e-09	0.124	0.035
TNFRSF9	0.341217	1.09347e-21	3.10622e-17	0.066	0
CPNE7	0.341034	1.70542e-08	0.00048446	0.246	0.159
WARS	0.340861	2.05681e-11	5.84279e-07	0.145	0.072
HOOK2	0.340571	2.55108e-08	0.000724685	0.2	0.119
SYNJ2	0.33961	1.40783e-14	3.99921e-10	0.13	0.041
RANBP1	0.339552	3.14274e-11	8.92759e-07	0.346	0.269
PSMB3	0.338359	1.59325e-10	4.52595e-06	0.547	0.439
COMMD7	0.338049	2.41475e-10	6.85957e-06	0.303	0.214
NUP98	0.338002	6.67961e-10	1.89748e-05	0.278	0.177
TUBA1B	0.337268	2.23429e-12	6.34694e-08	0.664	0.645
NINJ2	0.336886	1.05779e-12	3.00487e-08	0.13	0.046
FAM83D	0.336104	1.47284e-20	4.18389e-16	0.072	0.001
SEC14L1	0.335517	7.92935e-12	2.25249e-07	0.15	0.064
PDE4A	0.335351	1.42711e-17	4.05399e-13	0.103	0.016
BCL2L11	0.3341	2.30372e-09	6.54418e-05	0.164	0.09
CLSTN3	0.333639	1.40159e-10	3.98151e-06	0.21	0.127
HAUS3	0.332633	1.34233e-08	0.000381315	0.234	0.159
YIPF5	0.331975	1.63561e-13	4.64627e-09	0.317	0.271
CDC42	0.331603	4.27218e-14	1.2136e-09	0.733	0.668
CRTAM	0.331558	2.40947e-11	6.84458e-07	0.046	0.003
SMARCA2	0.331429	1.39534e-08	0.000396375	0.421	0.331
ARPC1B	0.331426	1.50492e-20	4.27501e-16	0.733	0.733
PAFAH1B1	0.33094	3.09752e-10	8.79913e-06	0.382	0.302
SLC20A1	0.330889	1.94009e-12	5.51121e-08	0.256	0.199
B2M	0.330336	3.55919e-68	1.01106e-63	1	1
CFAP20	0.329802	1.26617e-09	3.59681e-05	0.164	0.087
CCDC47	0.328375	3.89805e-10	1.10732e-05	0.201	0.111
CAMK1	0.32755	1.40751e-18	3.99831e-14	0.093	0.01
NCF4	0.327332	7.04376e-09	0.000200092	0.232	0.141
RNF138	0.326533	8.26418e-10	2.34761e-05	0.234	0.159
HSPA4	0.326205	8.90993e-09	0.000253104	0.227	0.154
STIP1	0.326139	2.35333e-10	6.68512e-06	0.22	0.149
SRRM1	0.325532	8.78591e-12	2.49581e-07	0.63	0.57
SERPINB1	0.32523	5.35504e-12	1.52121e-07	0.409	0.397
NDUFV2	0.324986	6.9588e-12	1.97679e-07	0.491	0.453
DIAPH1	0.324753	1.90497e-10	5.41146e-06	0.47	0.386
AGPAT5	0.324727	2.19882e-10	6.24619e-06	0.145	0.065
REEP5	0.324436	2.67277e-11	7.59253e-07	0.514	0.436
LMNB1	0.324064	2.65825e-10	7.5513e-06	0.163	0.081
TRAF4	0.323003	6.12672e-13	1.74042e-08	0.12	0.039
ATP5MC3	0.322527	2.72269e-15	7.73434e-11	0.587	0.537
FBXO32	0.322092	1.23775e-10	3.51607e-06	0.173	0.13
PRXL2C	0.322046	1.95109e-10	5.54245e-06	0.147	0.074
DOCK2	0.321682	4.39836e-09	0.000124944	0.3	0.219
SKP1	0.320555	3.87805e-14	1.10164e-09	0.792	0.747
PAF1	0.320092	5.1081e-09	0.000145106	0.245	0.166
CIB1	0.319908	4.33277e-13	1.23081e-08	0.665	0.609
ANP32E	0.319706	1.07707e-10	3.05962e-06	0.402	0.338
BUD31	0.319285	1.89836e-10	5.39266e-06	0.361	0.285
CLTB	0.318973	7.08605e-10	2.01293e-05	0.363	0.28
PPARG	0.31738	6.79836e-17	1.93121e-12	0.083	0.009
SUSD6	0.317328	8.57883e-11	2.43699e-06	0.165	0.076
NAPSA	0.317135	5.59773e-17	1.59015e-12	0.059	0.001
PSTPIP1	0.316183	4.86929e-09	0.000138322	0.376	0.292
HMGCS1	0.315885	1.55555e-10	4.41884e-06	0.147	0.07
SLC3A2	0.315716	1.64588e-13	4.67545e-09	0.503	0.461
HNRNPC	0.315079	2.39603e-13	6.8064e-09	0.669	0.621
RALGAPA1	0.314962	1.02287e-09	2.90567e-05	0.253	0.174
SRA1	0.314421	4.27668e-09	0.000121488	0.247	0.167
COPS2	0.314148	6.87581e-09	0.000195321	0.286	0.2
DDX21	0.313894	8.13713e-10	2.31151e-05	0.357	0.307
APLP2	0.313704	4.9528e-09	0.000140694	0.181	0.11
HIST1H3D	0.311931	1.79774e-07	0.00510685	0.205	0.128
EIF4G3	0.311926	1.02826e-08	0.000292097	0.177	0.094
ATP5F1E	0.311895	5.69796e-23	1.61862e-18	0.963	0.982
MSC	0.311865	6.72669e-08	0.00191085	0.136	0.069
SPTSSA	0.311591	2.1817e-11	6.19755e-07	0.126	0.046
RAB27A	0.31076	1.58114e-08	0.000449155	0.313	0.24
DNAJB11	0.310614	9.51511e-10	2.70296e-05	0.247	0.165
SF3B1	0.310502	6.92713e-11	1.96779e-06	0.646	0.588
ETV3	0.310164	5.54465e-10	1.57507e-05	0.139	0.063
DDIT3	0.310025	1.63626e-07	0.00464813	0.221	0.156
TOMM5	0.309151	6.51226e-13	1.84994e-08	0.398	0.358
PSME4	0.309149	2.11931e-09	6.02033e-05	0.168	0.085
CD200	0.308707	6.0009e-20	1.70468e-15	0.061	0
HIST1H2AC	0.30734	8.69582e-08	0.00247022	0.175	0.1
MIER1	0.307293	1.39219e-12	3.95479e-08	0.325	0.269
PLEKHA2	0.30678	2.77415e-09	7.88054e-05	0.238	0.174
IDH2	0.306636	1.75026e-10	4.97196e-06	0.358	0.297
COX6C	0.306046	1.33208e-18	3.78404e-14	0.749	0.737
TSC22D2	0.305217	3.59922e-08	0.00102243	0.17	0.1
NDUFA6	0.304854	8.25547e-11	2.34513e-06	0.448	0.384
HSPA2	0.304007	6.62062e-22	1.88072e-17	0.067	0
NUDT4	0.303969	5.68172e-08	0.00161401	0.227	0.136
BCL6	0.302776	5.58262e-07	0.0158585	0.178	0.116
ATP5F1B	0.302477	1.03398e-12	2.93722e-08	0.704	0.649
CRY1	0.302298	1.80796e-10	5.13587e-06	0.215	0.152
PRRC2C	0.302246	8.38545e-12	2.38205e-07	0.617	0.573
PRKX	0.30166	1.61875e-09	4.59838e-05	0.356	0.308
RAC1	0.301442	9.69747e-11	2.75476e-06	0.586	0.538
ARPP19	0.300987	7.47563e-09	0.00021236	0.255	0.173
MFHAS1	0.300675	2.5186e-07	0.00715457	0.27	0.203
CTNNA1	0.29975	7.38381e-10	2.09752e-05	0.143	0.071
ARPC2	0.299396	3.65294e-19	1.03769e-14	0.856	0.858
AGTRAP	0.296792	8.15747e-08	0.00231729	0.167	0.1
FKBP4	0.295723	3.20055e-08	0.000909182	0.172	0.122
CCNL1	0.294993	1.52318e-09	4.32688e-05	0.576	0.522
GABARAPL1	0.294967	5.54596e-09	0.000157544	0.15	0.074
PAK2	0.294817	2.33682e-08	0.00066382	0.418	0.347
AGO2	0.294427	4.17606e-08	0.00118629	0.229	0.153
JAZF1	0.294329	3.24878e-08	0.00092288	0.151	0.078
GTF3C6	0.294146	3.43426e-09	9.75569e-05	0.317	0.259
ALYREF	0.292583	1.37592e-09	3.90856e-05	0.363	0.292
IL6ST	0.292479	3.37167e-08	0.00095779	0.204	0.133
SFMBT2	0.292465	1.09402e-10	3.10778e-06	0.128	0.053
PSMA1	0.291978	2.21349e-10	6.28786e-06	0.43	0.365
IFI27	0.291879	3.95626e-19	1.12386e-14	0.07	0.007
ILF2	0.291459	7.37182e-12	2.09411e-07	0.402	0.349
CEBPZ	0.291257	4.09526e-07	0.0116334	0.349	0.28
PRNP	0.291125	5.49103e-12	1.55984e-07	0.471	0.441
RSRC2	0.291003	1.1194e-07	0.00317989	0.385	0.314
BLOC1S2	0.290968	2.42703e-09	6.89446e-05	0.249	0.191
GATA3	0.290907	4.05166e-09	0.000115096	0.407	0.383
CTSZ	0.290739	9.24597e-08	0.0026265	0.216	0.138
FBXO34	0.290019	4.24455e-07	0.0120575	0.216	0.159
MCM6	0.289709	2.76936e-09	7.86693e-05	0.152	0.076
AGFG1	0.289682	5.96544e-08	0.0016946	0.186	0.11
ZC3HAV1	0.289326	1.48408e-09	4.21584e-05	0.527	0.499
AZIN1	0.288842	8.09975e-09	0.000230089	0.222	0.159
LAIR2	0.288723	5.26567e-07	0.0149582	0.053	0.015
KRT19	0.287276	4.00757e-22	1.13843e-17	0.068	0
SDF4	0.287081	1.65027e-11	4.68793e-07	0.385	0.336
UBE2K	0.286631	6.33471e-08	0.0017995	0.251	0.176
RGS9	0.286597	2.64188e-19	7.5048e-15	0.083	0.006
SUMO2	0.285593	4.19641e-14	1.19207e-09	0.811	0.791
ATP6V0B	0.285083	7.79583e-09	0.000221456	0.402	0.328
GCH1	0.285006	1.38322e-09	3.9293e-05	0.161	0.093
SERPINH1	0.2847	5.17479e-07	0.0147	0.06	0.025
THBS1	0.283895	6.15337e-08	0.00174799	0.052	0.013
SERTAD2	0.283716	2.80573e-11	7.97025e-07	0.134	0.056
NUCB1	0.28322	4.90227e-09	0.000139259	0.406	0.339
COX7B	0.282639	3.83276e-10	1.08877e-05	0.56	0.516
PHLDA2	0.282589	4.80176e-11	1.36404e-06	0.059	0.01
MFSD14A	0.282235	6.96282e-09	0.000197793	0.263	0.189
MEF2D	0.281991	1.64291e-07	0.004667	0.232	0.161
RILPL2	0.281942	8.43808e-07	0.0239701	0.281	0.221
MSL2	0.28194	9.01191e-11	2.56001e-06	0.198	0.149
SLC39A8	0.281348	3.64419e-07	0.0103521	0.192	0.124
TAP1	0.281038	6.25069e-10	1.77563e-05	0.489	0.443
AFAP1L2	0.280627	4.6334e-14	1.31621e-09	0.064	0.006
SAP30	0.279983	1.13568e-08	0.000322613	0.167	0.113
FMNL3	0.279531	5.11981e-09	0.000145438	0.147	0.07
SPAG9	0.279096	1.86177e-07	0.00528874	0.212	0.143
TSPO	0.27891	7.88529e-14	2.23997e-09	0.614	0.59
SKAP1	0.278517	1.07569e-10	3.05572e-06	0.485	0.438
TMSB4X	0.278312	9.99727e-22	2.83993e-17	1	0.999
DDIT4-AS1	0.277592	6.68905e-14	1.90016e-09	0.079	0.011
BLOC1S6	0.277205	1.43284e-07	0.00407026	0.199	0.133
DERL1	0.277176	7.5456e-08	0.00214348	0.282	0.207
SOCS3	0.277141	1.0325e-09	2.93302e-05	0.245	0.138
SLC5A3	0.277111	2.15926e-07	0.00613382	0.183	0.104
NETO2	0.276622	1.47046e-12	4.17714e-08	0.094	0.022
CCR5	0.276613	1.33431e-08	0.000379038	0.139	0.063
ELMSAN1	0.276246	1.48654e-08	0.000422282	0.217	0.175
RBM25	0.276057	1.13597e-09	3.22696e-05	0.477	0.434
SLA2	0.275704	8.60546e-08	0.00244455	0.203	0.136
SMC5	0.275366	8.37929e-07	0.023803	0.24	0.169
SLTM	0.274301	6.74607e-07	0.0191636	0.35	0.285
MIR22HG	0.274179	1.30345e-08	0.000370271	0.097	0.035
MAPRE1	0.273818	1.36862e-06	0.0388784	0.269	0.192
SERBP1	0.273678	5.74443e-09	0.000163182	0.538	0.482
TP53INP1	0.273338	3.97677e-08	0.00112968	0.125	0.064
DNAJC15	0.272919	1.18634e-08	0.000337004	0.287	0.229
SLC1A4	0.272542	1.12199e-12	3.18724e-08	0.085	0.017
UQCRQ	0.272316	6.65341e-10	1.89003e-05	0.445	0.403
CDC37	0.271973	1.3682e-17	3.88665e-13	0.646	0.65
CAP1	0.271718	7.27809e-13	2.06749e-08	0.654	0.633
AHSA1	0.271529	1.2401e-08	0.000352275	0.215	0.16
KIAA0232	0.271049	1.96515e-07	0.0055824	0.155	0.088
BSG	0.270975	1.61753e-09	4.59492e-05	0.516	0.459
VIM-AS1	0.270594	2.68538e-07	0.00762835	0.184	0.125
CCDC50	0.270236	3.04413e-08	0.000864747	0.119	0.051
MRPS6	0.270127	5.72169e-11	1.62536e-06	0.41	0.375
ETV7	0.270118	6.38344e-09	0.000181334	0.105	0.043
UBE2N	0.27008	5.17836e-08	0.00147102	0.405	0.334
IL13	0.269784	1.4815e-11	4.20849e-07	0.034	0
AKAP5	0.269752	2.89145e-15	8.21373e-11	0.057	0.002
GK	0.26967	4.72345e-08	0.00134179	0.085	0.035
SFTA2	0.268677	5.17582e-12	1.4703e-07	0.043	0.001
MLF1	0.268596	1.54879e-09	4.39964e-05	0.061	0.014
AC011603.2	0.268543	4.58045e-08	0.00130117	0.132	0.071
ELOVL5	0.268307	3.77602e-07	0.0107265	0.42	0.349
TMEM59	0.268062	2.39958e-11	6.81648e-07	0.635	0.597
OTULIN	0.267663	2.00398e-07	0.00569271	0.152	0.082
PTS	0.267252	2.66666e-09	7.57519e-05	0.126	0.058
GYPC	0.26708	3.56311e-08	0.00101217	0.524	0.482
ZC3H12D	0.266529	1.04084e-08	0.00029567	0.107	0.042
C15orf48	0.266316	2.42305e-11	6.88314e-07	0.033	0
SIPA1L1	0.266264	1.58238e-07	0.00449507	0.147	0.08
SMARCA5	0.266157	2.06102e-07	0.00585475	0.325	0.273
SEMA4A	0.264972	1.37782e-13	3.91398e-09	0.059	0.005
PTPRC	0.264334	2.5438e-11	7.22617e-07	0.941	0.931
CNOT2	0.264307	1.00243e-07	0.00284759	0.298	0.243
PARK7	0.263747	1.51284e-12	4.29751e-08	0.552	0.537
RPL22L1	0.262888	3.17486e-10	9.01883e-06	0.427	0.405
MRPL47	0.262787	7.795e-11	2.21433e-06	0.217	0.166
SEL1L3	0.262744	5.79932e-07	0.0164741	0.239	0.177
PRELID1	0.262284	3.88362e-10	1.10322e-05	0.46	0.438
RIN3	0.261958	4.64128e-08	0.00131845	0.132	0.082
PTBP1	0.261764	7.53202e-07	0.0213962	0.369	0.307
GPR35	0.261408	1.02754e-14	2.91893e-10	0.074	0.008
CXCL16	0.261017	2.25527e-10	6.40654e-06	0.072	0.018
SC5D	0.260567	1.18887e-08	0.000337721	0.105	0.042
CDKN2A	0.260139	2.86562e-08	0.000814036	0.097	0.042
CCDC59	0.25989	4.24335e-07	0.0120541	0.32	0.269
GMDS	0.259306	9.41666e-10	2.67499e-05	0.122	0.061
SH2D2A	0.259264	1.16971e-06	0.0332279	0.465	0.424
TSEN54	0.258725	5.44825e-07	0.0154768	0.306	0.255
EZH2	0.258492	6.50585e-11	1.84812e-06	0.114	0.037
IL2RA	0.257968	1.24144e-08	0.000352657	0.045	0.007
BHLHE40-AS1	0.25763	2.22302e-10	6.31493e-06	0.074	0.017
KCTD17	0.257446	3.45653e-07	0.00981897	0.131	0.071
CTNNB1	0.256597	1.35252e-08	0.00038421	0.296	0.251
TMBIM6	0.256588	3.16071e-14	8.97863e-10	0.746	0.738
HBS1L	0.256577	2.62716e-08	0.000746298	0.187	0.126
MRPL54	0.256277	2.66662e-07	0.00757506	0.382	0.327
RHEB	0.256223	4.35952e-07	0.0123841	0.276	0.213
C9orf16	0.256137	6.6898e-09	0.000190037	0.579	0.553
SLC25A33	0.25571	1.11603e-09	3.17029e-05	0.105	0.041
PSME1	0.255404	2.79413e-14	7.9373e-10	0.848	0.857
FBXO33	0.255314	6.07918e-07	0.0172691	0.175	0.116
CEACAM6	0.255219	1.44252e-17	4.09778e-13	0.053	0
NDUFA1	0.255057	1.20533e-12	3.42399e-08	0.691	0.684
CALM3	0.254935	1.28259e-09	3.64346e-05	0.508	0.466
DCTN3	0.254896	6.09889e-08	0.00173251	0.3	0.243
MBNL1	0.25442	1.56718e-09	4.45188e-05	0.767	0.736
NUSAP1	0.254022	2.00217e-11	5.68755e-07	0.081	0.017
CLK1	0.253975	3.04933e-07	0.00866222	0.36	0.308
NDUFB2	0.253662	1.41826e-08	0.000402886	0.545	0.505
MAGOH	0.252733	3.03513e-11	8.6219e-07	0.413	0.386
ACOT7	0.252538	3.07234e-14	8.72761e-10	0.076	0.01
PSMB2	0.25239	3.40928e-07	0.00968475	0.343	0.287
MAPKAPK3	0.252242	8.40522e-07	0.0238767	0.197	0.138
STAM	0.251968	3.85716e-07	0.010957	0.123	0.066
PPP5C	0.251411	1.42549e-07	0.00404939	0.158	0.093
IFFO2	0.251192	1.54068e-06	0.0437662	0.201	0.146
PSMA7	0.250999	5.88614e-09	0.000167208	0.668	0.62
USP12	0.250968	7.01589e-07	0.01993	0.163	0.096
GBP5	0.25072	3.92689e-07	0.0111551	0.431	0.415
SH3KBP1	0.2506	8.09728e-07	0.0230019	0.511	0.462
IL21	0.25014	1.2936e-09	3.67472e-05	0.041	0.003
ARHGEF12	0.249286	5.44036e-09	0.000154544	0.094	0.037
HCG18	0.249006	1.44713e-07	0.00411085	0.204	0.158
CRYBG1	0.248093	1.28136e-08	0.000363995	0.212	0.174
HLA-B	0.247719	2.6615e-08	0.000756052	1	1
RAB21	0.247648	1.4018e-07	0.0039821	0.23	0.177
C16orf87	0.247201	2.3735e-07	0.0067424	0.126	0.068
RASD1	0.247159	1.88158e-10	5.345e-06	0.042	0.002
UBALD2	0.246942	2.12199e-07	0.00602794	0.513	0.474
GNG5	0.246472	1.68741e-13	4.79344e-09	0.54	0.533
MYO9B	0.246089	2.23696e-07	0.00635452	0.278	0.231
SEM1	0.245657	1.93489e-12	5.49645e-08	0.515	0.507
GNA13	0.245086	6.00985e-09	0.000170722	0.312	0.27
PPP1R10	0.244596	1.16999e-07	0.0033236	0.252	0.215
CD58	0.244178	1.13731e-08	0.000323076	0.338	0.309
YTHDF3	0.243957	9.0941e-07	0.0258336	0.171	0.111
PPM1G	0.243561	2.40509e-11	6.83215e-07	0.342	0.308
PLEKHB2	0.2426	9.0439e-07	0.025691	0.21	0.156
ARF6	0.24235	1.37935e-13	3.91832e-09	0.633	0.635
NAF1	0.241751	1.57575e-07	0.00447624	0.121	0.062
YWHAH	0.241738	1.33891e-08	0.000380343	0.285	0.257
DNAJA4	0.241672	7.45121e-08	0.00211667	0.068	0.021
RAPGEF6	0.241492	1.82285e-10	5.17818e-06	0.318	0.303
TMEM200A	0.24144	1.43966e-11	4.08964e-07	0.078	0.016
HNRNPA2B1	0.240945	4.05757e-12	1.15263e-07	0.868	0.879
VDR	0.240646	5.92929e-18	1.68433e-13	0.068	0.002
PLEKHG2	0.24026	1.95071e-09	5.54139e-05	0.089	0.029
KRT8	0.239573	1.80209e-12	5.1192e-08	0.062	0.007
MCOLN2	0.239045	5.15102e-07	0.0146325	0.101	0.048
BICDL1	0.238328	1.09648e-07	0.00311478	0.112	0.051
SRRT	0.238265	1.7971e-07	0.00510502	0.276	0.254
SLPI	0.237727	2.37125e-17	6.736e-13	0.052	0
DYNC1H1	0.237223	8.45914e-07	0.0240299	0.379	0.33
TNFRSF12A	0.236858	2.96529e-13	8.42349e-09	0.068	0.008
RNF7	0.236621	5.24628e-09	0.000149031	0.469	0.426
GFPT1	0.236492	1.02641e-06	0.0291573	0.19	0.125
CD3G	0.236309	4.42315e-11	1.25648e-06	0.66	0.661
ATP6V0E1	0.235598	8.14903e-11	2.3149e-06	0.594	0.572
NOCT	0.235153	8.76071e-15	2.48865e-10	0.064	0.005
EWSR1	0.235022	7.00858e-10	1.99093e-05	0.549	0.518
CLP1	0.234665	9.51454e-10	2.70279e-05	0.085	0.027
RCOR1	0.234638	2.43756e-08	0.000692437	0.111	0.061
MFSD10	0.234053	5.17045e-08	0.00146877	0.312	0.275
BPGM	0.233776	1.34042e-07	0.00380774	0.134	0.087
PIGT	0.233582	1.0555e-06	0.0299835	0.213	0.164
ZNF282	0.233381	8.98275e-07	0.0255173	0.102	0.048
CD109	0.233371	1.01349e-14	2.87901e-10	0.064	0.005
CASS4	0.232967	2.08191e-07	0.00591408	0.074	0.027
RYBP	0.23251	5.46499e-09	0.000155244	0.094	0.031
PSMA2	0.232271	1.7073e-10	4.84994e-06	0.403	0.378
SYNGR3	0.23209	1.20734e-12	3.42969e-08	0.067	0.009
PRDX6	0.231635	1.43881e-09	4.08723e-05	0.38	0.354
SSH1	0.231586	2.95504e-08	0.000839439	0.103	0.042
COPE	0.231573	2.57348e-11	7.31048e-07	0.538	0.514
GDE1	0.231567	4.37427e-07	0.012426	0.135	0.081
VCP	0.231488	2.80558e-07	0.0079698	0.518	0.47
RBBP8	0.230752	1.58342e-13	4.49801e-09	0.059	0.005
PLAA	0.230584	1.65911e-07	0.00471304	0.154	0.101
MPC2	0.230286	9.20156e-08	0.00261389	0.327	0.288
RRBP1	0.229108	2.8494e-07	0.0080943	0.107	0.053
ACSL1	0.228333	2.36734e-09	6.7249e-05	0.094	0.03
TFIP11	0.228219	9.85004e-07	0.027981	0.23	0.18
NAPA	0.227969	6.31138e-09	0.000179287	0.385	0.352
PPIA	0.227883	4.07489e-10	1.15755e-05	0.95	0.953
ARPC3	0.227764	1.04237e-13	2.96105e-09	0.83	0.852
AFAP1	0.227348	1.20308e-07	0.00341758	0.109	0.049
TBCC	0.227115	1.6352e-06	0.046451	0.311	0.272
ATP2A2	0.226828	1.51718e-07	0.00430986	0.153	0.11
SPSB1	0.226469	2.40775e-08	0.000683971	0.096	0.034
UHRF1BP1L	0.226359	6.0405e-08	0.00171592	0.15	0.103
TNS3	0.226027	5.53724e-15	1.57296e-10	0.045	0
MAN1A1	0.225798	9.49848e-07	0.0269823	0.136	0.09
IFNGR1	0.225739	8.42832e-08	0.00239423	0.242	0.217
CNBD2	0.225358	1.42064e-08	0.000403561	0.081	0.03
HNRNPDL	0.225316	3.14762e-17	8.94144e-13	0.816	0.851
SDC4	0.225248	4.40386e-08	0.001251	0.09	0.034
ANKRD35	0.224859	1.3377e-14	3.79999e-10	0.057	0.002
DUSP8	0.224748	5.70095e-07	0.0161947	0.103	0.043
BCAR3	0.2246	2.67192e-11	7.59012e-07	0.056	0.007
ALDOC	0.223992	8.50304e-07	0.0241546	0.094	0.04
GALNT1	0.223642	1.07827e-06	0.0306305	0.137	0.089
SNAP47	0.223481	1.34104e-08	0.000380951	0.164	0.135
OAZ1	0.223441	1.71883e-12	4.88267e-08	0.909	0.923
GNG4	0.223058	3.1323e-13	8.89791e-09	0.048	0.001
IGKV4-1	0.22294	2.06773e-12	5.87381e-08	0.037	0
NCL	0.222923	4.58452e-11	1.30232e-06	0.799	0.817
SERINC1	0.222566	3.47184e-07	0.00986245	0.468	0.435
MRPL41	0.222257	5.19118e-07	0.0147466	0.356	0.308
HNRNPU	0.221482	8.58178e-09	0.000243783	0.752	0.743
HBP1	0.221274	8.60102e-07	0.0244329	0.294	0.253
AC025259.3	0.22098	7.64433e-16	2.17153e-11	0.048	0
LAPTM5	0.220764	1.15507e-07	0.00328122	0.959	0.967
RAB35	0.220608	7.95973e-07	0.0226112	0.173	0.12
DENND6B	0.219479	4.80306e-11	1.36441e-06	0.058	0.008
KANSL2	0.219303	5.09213e-07	0.0144652	0.178	0.135
TGIF2	0.218645	1.41195e-06	0.0401091	0.119	0.064
ITPRIP	0.218224	7.61774e-08	0.00216397	0.093	0.041
ITK	0.218176	2.0907e-11	5.93906e-07	0.449	0.465
ARID4B	0.21767	1.37518e-06	0.0390647	0.48	0.45
TUBA1C	0.215511	8.46422e-07	0.0240443	0.328	0.305
NCOR1	0.214812	8.29266e-09	0.000235569	0.456	0.441
GNAS	0.21325	3.88868e-11	1.10466e-06	0.861	0.87
POU3F1	0.212929	4.75943e-09	0.000135201	0.077	0.021
MAL	0.212576	9.88653e-10	2.80847e-05	0.145	0.145
ELOB	0.212468	2.20812e-09	6.2726e-05	0.749	0.738
COX7A2	0.212207	3.24696e-09	9.22363e-05	0.684	0.673
RBM39	0.211204	1.37026e-08	0.000389251	0.675	0.673
RNF167	0.211123	7.85173e-08	0.00223044	0.413	0.379
COL9A2	0.211061	3.31342e-13	9.41244e-09	0.059	0.005
BANF1	0.210621	7.02279e-09	0.000199496	0.289	0.263
YTHDF2	0.209848	7.56603e-07	0.0214928	0.336	0.299
PPP4R2	0.209508	5.32606e-07	0.0151297	0.306	0.264
PPM1D	0.209293	7.25716e-07	0.0206154	0.139	0.095
AC093484.3	0.208607	4.42466e-10	1.25691e-05	0.071	0.016
MAFF	0.206069	9.34103e-07	0.0265351	0.069	0.029
ZBTB21	0.206039	1.63339e-06	0.0463997	0.09	0.045
KRT18	0.205919	6.60936e-10	1.87752e-05	0.063	0.014
RWDD1	0.205595	5.51323e-09	0.000156614	0.451	0.431
RAP1B	0.205322	3.07554e-10	8.73668e-06	0.625	0.626
ITGA1	0.205282	6.06348e-08	0.00172245	0.074	0.032
WTAP	0.205196	1.74842e-06	0.0496675	0.436	0.405
HMOX1	0.204421	2.05821e-15	5.84674e-11	0.046	0
PARVB	0.203415	1.33378e-06	0.0378886	0.09	0.039
RFX2	0.202863	1.22084e-08	0.000346805	0.059	0.014
RAP1A	0.202397	1.53437e-07	0.00435869	0.508	0.485
ANAPC16	0.202195	2.38896e-10	6.78632e-06	0.591	0.6
GNAI2	0.202111	2.1934e-07	0.00623079	0.781	0.761
BTAF1	0.200502	9.20195e-07	0.02614	0.18	0.144
FAM53C	0.199916	9.16284e-07	0.0260289	0.097	0.04
ATP5MF	0.198915	9.69644e-10	2.75447e-05	0.549	0.553
GLCCI1	0.198127	1.624e-06	0.0461328	0.229	0.2
NOP10	0.197256	3.6848e-08	0.00104674	0.397	0.383
BCAP31	0.196564	6.47724e-11	1.83999e-06	0.466	0.467
NDUFA2	0.195264	1.68203e-08	0.000477813	0.351	0.33
TCEA1	0.195206	1.0912e-10	3.09978e-06	0.434	0.442
RARA	0.194717	1.26231e-06	0.0358584	0.225	0.199
ADRM1	0.194478	7.20662e-07	0.0204718	0.382	0.356
CD3E	0.194471	6.72351e-09	0.000190995	0.977	0.977
PRSS23	0.194404	1.26925e-11	3.60556e-07	0.041	0.001
ALDOA	0.19401	6.11651e-09	0.000173752	0.737	0.752
SLC34A2	0.191985	2.42305e-11	6.88314e-07	0.033	0
CFLAR	0.191637	1.30228e-09	3.6994e-05	0.48	0.483
TRA2B	0.191145	1.43948e-07	0.00408912	0.5	0.506
CD99	0.190449	2.93954e-07	0.00835036	0.903	0.9
WDR83OS	0.18983	1.16602e-07	0.00331231	0.527	0.513
DRAIC	0.189425	3.14963e-12	8.94715e-08	0.049	0.003
UBE2B	0.189196	4.30018e-08	0.00122155	0.509	0.495
SUMO1	0.188956	4.68973e-08	0.00133221	0.421	0.398
AGR2	0.18892	2.06773e-12	5.87381e-08	0.037	0
PLXDC1	0.188823	5.41378e-07	0.0153789	0.057	0.016
CENPN	0.188542	2.87922e-10	8.17899e-06	0.055	0.008
RRP12	0.187972	9.72721e-09	0.000276321	0.079	0.023
SREBF1	0.186696	1.6911e-07	0.00480392	0.063	0.019
TAGAP	0.184005	5.51349e-07	0.0156622	0.433	0.476
NENF	0.183743	1.87036e-07	0.00531313	0.282	0.257
SPINK1	0.183696	2.87921e-13	8.17896e-09	0.039	0
ANXA2	0.183391	2.71707e-09	7.71839e-05	0.575	0.61
OSM	0.182045	1.3878e-10	3.94234e-06	0.043	0.002
CENPF	0.181087	2.96989e-07	0.00843656	0.057	0.014
HLA-C	0.180287	3.44961e-10	9.7993e-06	1	1
TRIM28	0.179752	1.02936e-07	0.00292411	0.332	0.316
UBL5	0.179538	3.84979e-09	0.000109361	0.756	0.764
CYB5R3	0.179529	7.602e-07	0.021595	0.258	0.238
ARG2	0.178901	2.70918e-13	7.69598e-09	0.048	0.001
RNASE1	0.178803	7.56385e-10	2.14866e-05	0.028	0
PPP4R3A	0.178295	3.70464e-07	0.0105238	0.334	0.316
LINC02195	0.177485	3.38365e-12	9.61193e-08	0.036	0
RALY	0.176762	9.695e-08	0.00275406	0.495	0.482
SCUBE1	0.176354	3.37624e-15	9.59089e-11	0.045	0
MYL6B	0.176117	1.42116e-10	4.0371e-06	0.052	0.006
BIK	0.174475	8.97341e-07	0.0254908	0.06	0.019
FAM43A	0.17434	5.39003e-07	0.0153115	0.054	0.015
KRT7	0.173921	1.7581e-13	4.99423e-09	0.04	0
ASB2	0.173807	2.48169e-09	7.04974e-05	0.048	0.006
PIGR	0.173613	1.07335e-13	3.04906e-09	0.041	0
SNU13	0.173499	9.0965e-11	2.58404e-06	0.511	0.527
ENC1	0.173383	1.38676e-10	3.93938e-06	0.042	0.002
RAB11A	0.173366	4.69516e-07	0.0133376	0.305	0.286
GUSB	0.171983	6.04074e-07	0.0171599	0.174	0.149
ETS2	0.171439	4.4669e-07	0.0126891	0.067	0.03
RASSF4	0.171283	3.38365e-12	9.61193e-08	0.036	0
RNPS1	0.171238	5.41038e-07	0.0153693	0.456	0.445
OSTF1	0.170969	2.2797e-07	0.00647595	0.431	0.418
MTHFD1L	0.170694	1.07178e-09	3.04461e-05	0.057	0.009
MZB1	0.169957	4.13775e-10	1.17541e-05	0.041	0.003
SOCS2	0.169916	2.76944e-07	0.00786716	0.053	0.014
HES4	0.169536	8.46849e-11	2.40564e-06	0.038	0.001
CHRM3-AS2	0.168747	1.0938e-07	0.00310715	0.053	0.015
SPRED2	0.167034	8.70213e-12	2.47201e-07	0.047	0.002
SFTPA1	0.166028	7.71825e-13	2.19252e-08	0.038	0
SGPP2	0.165284	7.18045e-08	0.00203975	0.051	0.01
TBX21	0.164971	7.14297e-08	0.0020291	0.209	0.207
AC004585.1	0.164956	3.13251e-07	0.00889853	0.059	0.015
ATP5F1C	0.164776	7.6679e-08	0.00217822	0.43	0.424
IFI30	0.163674	1.17593e-08	0.000334045	0.068	0.017
UQCR11	0.163284	1.38979e-09	3.94798e-05	0.771	0.807
HLA-A	0.161998	4.45687e-09	0.000126606	0.999	1
PDIA6	0.161678	5.92818e-08	0.00168402	0.429	0.436
SSBP4	0.161528	7.69592e-07	0.0218618	0.404	0.397
ULBP2	0.161254	1.7581e-13	4.99423e-09	0.04	0
HMGB3	0.160862	1.34121e-06	0.0380996	0.05	0.013
RSBN1	0.160512	1.13289e-07	0.0032182	0.267	0.262
TYMS	0.160451	1.45277e-06	0.0412689	0.03	0.003
IKZF4	0.160313	4.44651e-07	0.0126312	0.045	0.01
ANXA6	0.157784	6.35478e-08	0.0018052	0.606	0.617
PPP1R2C	0.156956	1.20159e-06	0.0341335	0.018	0
PLK2	0.155408	8.1031e-07	0.0230185	0.04	0.007
MAPK11	0.1545	1.84148e-08	0.00052311	0.052	0.009
MYL12B	0.154375	2.29641e-08	0.000652341	0.888	0.915
HOPX	0.153699	2.3339e-08	0.000662992	0.34	0.378
HERC1	0.1524	1.05467e-06	0.02996	0.254	0.248
SOX5	0.151765	1.45605e-10	4.13621e-06	0.039	0.001
GGA2	0.151375	2.10326e-07	0.00597474	0.194	0.178
ERRFI1	0.148651	2.86423e-08	0.000813642	0.038	0.003
AC018816.1	0.147711	1.15927e-06	0.0329314	0.045	0.009
HNRNPA0	0.146937	2.01212e-07	0.00571584	0.642	0.669
PAIP2	0.146813	4.34125e-07	0.0123322	0.536	0.541
WIPF3	0.146496	1.4815e-11	4.20849e-07	0.034	0
ICAM3	0.146367	4.74613e-08	0.00134823	0.569	0.582
VAV3	0.143701	6.03614e-08	0.00171469	0.045	0.007
FZD6	0.143592	2.23438e-07	0.00634721	0.044	0.009
BARX2	0.143542	1.05938e-10	3.00937e-06	0.031	0
ETV1	0.143001	5.53624e-12	1.57268e-07	0.035	0
ARF5	0.142761	1.20528e-06	0.0342384	0.524	0.524
MCAM	0.142625	3.8496e-07	0.0109356	0.042	0.007
ATP8B4	0.142335	6.0245e-09	0.000171138	0.033	0.001
SERPINA1	0.142145	4.62774e-10	1.3146e-05	0.029	0
SMOX	0.141796	7.05622e-09	0.000200446	0.036	0.002
SFTPC	0.141081	7.56385e-10	2.14866e-05	0.028	0
IL2	0.140174	7.88385e-07	0.0223957	0.035	0.005
AVPI1	0.139508	1.75718e-06	0.0499163	0.048	0.013
TIAM2	0.139292	1.37363e-08	0.000390208	0.035	0.002
RNF149	0.138339	1.35381e-08	0.000384575	0.408	0.422
PPP1R2	0.138008	6.97913e-09	0.000198256	0.454	0.487
PIK3R3	0.137238	5.63405e-07	0.0160046	0.04	0.007
ARIH2	0.135465	2.9487e-07	0.00837638	0.287	0.291
ADIPOR1	0.135433	1.04409e-06	0.0296595	0.252	0.246
LINC01281	0.135149	1.73191e-10	4.91985e-06	0.03	0
NR5A2	0.134828	2.06773e-12	5.87381e-08	0.037	0
GPX4	0.134014	1.13861e-06	0.0323444	0.572	0.587
BAIAP2	0.133475	1.75786e-07	0.00499355	0.043	0.007
MASTL	0.133267	1.42098e-06	0.0403658	0.041	0.008
RAB7A	0.131967	1.20303e-06	0.0341743	0.427	0.428
BASP1	0.131777	2.35472e-08	0.000668905	0.023	0
KCNK5	0.131489	1.61872e-08	0.00045983	0.035	0.002
S100A9	0.130984	1.6804e-07	0.00477353	0.021	0
AL133405.2	0.129136	2.83116e-10	8.04248e-06	0.03	0
L1CAM	0.127109	4.37645e-07	0.0124322	0.033	0.003
IFITM10	0.12696	1.23308e-07	0.0035028	0.028	0.001
CXCL17	0.126938	2.35472e-08	0.000668905	0.023	0
STK17A	0.125882	1.23137e-07	0.00349797	0.672	0.705
FAIM2	0.125851	2.2031e-09	6.25833e-05	0.034	0.001
HNRNPL	0.123412	1.18165e-06	0.0335671	0.576	0.59
CARD16	0.122971	1.74233e-06	0.0494945	0.282	0.296
CPM	0.122754	1.23621e-09	3.5117e-05	0.028	0
LMCD1	0.122549	3.05211e-08	0.000867012	0.034	0.002
NRARP	0.122143	1.23621e-09	3.5117e-05	0.028	0
ABI1	0.122125	1.2397e-07	0.00352161	0.312	0.316
ITGA2	0.121863	9.49676e-07	0.0269774	0.04	0.007
KIFC3	0.120463	3.73346e-07	0.0106056	0.032	0.003
CLDN4	0.119865	4.62774e-10	1.3146e-05	0.029	0
CCT4	0.119678	7.06993e-07	0.0200835	0.358	0.375
AC004817.3	0.117437	6.08958e-08	0.00172987	0.03	0.001
SLIRP	0.114742	1.28285e-06	0.0364418	0.294	0.299
INPP5D	0.112594	1.61784e-06	0.045958	0.271	0.279
GFOD1	0.112066	1.73191e-10	4.91985e-06	0.03	0
IQCN	0.111887	1.29924e-06	0.0369075	0.032	0.003
SMIM22	0.111441	7.34594e-07	0.0208676	0.019	0
IGFBP2	0.111385	1.44089e-08	0.000409314	0.024	0
AK4	0.110832	8.64465e-07	0.0245569	0.025	0.001
CDK2AP2	0.109479	9.4364e-07	0.026806	0.334	0.35
CCR1	0.107764	2.02032e-09	5.73912e-05	0.027	0
CEBPB	0.107572	8.06106e-08	0.00228991	0.251	0.267
TPPP	0.106834	3.78271e-07	0.0107456	0.027	0.001
RGMA	0.106527	5.87118e-07	0.0166783	0.026	0.001
ATP1A1	0.106341	3.44626e-07	0.00978978	0.36	0.374
SLCO4A1	0.105569	1.68129e-08	0.000477604	0.031	0.001
EBI3	0.104555	1.02799e-07	0.00292023	0.021	0
FOLR1	0.104086	1.6804e-07	0.00477353	0.021	0
PDLIM4	0.103951	1.02799e-07	0.00292023	0.021	0
SPTAN1	0.103686	5.94224e-07	0.0168801	0.558	0.592
IRF8	0.103427	8.28985e-07	0.023549	0.029	0.002
SFTPA2	0.101952	5.39553e-09	0.000153271	0.025	0
SF3B6	0.100894	1.35158e-07	0.00383944	0.418	0.437
IGLV2-8	0.098963	7.34594e-07	0.0208676	0.019	0
JAG2	0.098834	9.28816e-07	0.0263849	0.025	0.001
CLNK	0.0983188	1.44089e-08	0.000409314	0.024	0
CRMP1	0.0962926	1.23621e-09	3.5117e-05	0.028	0
HMGB1	0.095608	3.63718e-09	0.000103321	0.88	0.936
SEPTIN7	0.0952792	1.57631e-06	0.0447781	0.632	0.664
BRK1	0.0952655	8.62542e-08	0.00245022	0.511	0.543
PSMB1	0.095071	6.71347e-07	0.0190709	0.533	0.569
REEP2	0.0936832	8.81722e-09	0.000250471	0.025	0
NTRK1	0.0931115	1.6804e-07	0.00477353	0.021	0
HDGF	0.0928165	1.75252e-06	0.0497838	0.272	0.284
LCN2	0.0922204	7.34594e-07	0.0208676	0.019	0
STK24	0.0915367	1.26997e-07	0.00360759	0.518	0.554
DPF3	0.0910186	1.33298e-06	0.037866	0.023	0.001
CCND1	0.090652	7.34594e-07	0.0208676	0.019	0
BCAT1	0.0905292	8.66318e-07	0.0246095	0.025	0.001
P4HA2	0.0898785	3.84824e-08	0.00109317	0.023	0
CXCL2	0.0887366	2.7472e-07	0.00780396	0.02	0
TXNL4A	0.0886447	9.62872e-08	0.00273523	0.369	0.387
EFNB2	0.0881464	2.35472e-08	0.000668905	0.023	0
SERP2	0.0880343	2.35472e-08	0.000668905	0.023	0
COX5B	0.0876197	5.2712e-07	0.0149739	0.627	0.67
PDS5A	0.0864801	4.96243e-08	0.00140968	0.292	0.317
VEGFA	0.0858157	4.4919e-07	0.0127601	0.019	0
AL359834.1	0.0853483	7.34594e-07	0.0208676	0.019	0
PHEX	0.0848616	4.4919e-07	0.0127601	0.019	0
MAL2	0.0844098	7.34594e-07	0.0208676	0.019	0
S100A6	0.084056	2.72e-11	7.7267e-07	0.925	0.985
C19orf53	0.0799843	3.8613e-07	0.0109688	0.516	0.556
TRMT112	0.0770817	1.01202e-07	0.00287484	0.549	0.596
TBCB	0.0767093	1.26088e-08	0.000358178	0.399	0.438
NCS1	0.0766743	1.20159e-06	0.0341335	0.018	0
NHS	0.0756987	2.7472e-07	0.00780396	0.02	0
PIK3R1	0.0756864	1.03255e-08	0.000293316	0.339	0.397
CDT1	0.0753038	4.4919e-07	0.0127601	0.019	0
UQCRFS1	0.075208	2.77405e-07	0.00788024	0.431	0.47
CD86	0.074022	2.7472e-07	0.00780396	0.02	0
IGHV1-3	0.0711189	1.20159e-06	0.0341335	0.018	0
EID1	0.0703312	7.4529e-09	0.000211715	0.572	0.636
PIK3AP1	0.0688037	7.34594e-07	0.0208676	0.019	0
ZNF292	0.0659703	2.05923e-07	0.00584965	0.306	0.343
TRAPPC1	0.0614477	5.80951e-07	0.0165031	0.458	0.502
RNASEK	0.060173	2.15909e-07	0.00613332	0.757	0.819
PTGES3	0.0498072	3.10013e-08	0.000880653	0.659	0.725
TOMM6	0.046021	8.9046e-08	0.00252953	0.451	0.505
CD40LG	0.045722	2.70151e-15	7.67418e-11	0.184	0.262
C4orf3	0.0420302	1.15714e-07	0.00328708	0.513	0.574
ATP5MPL	0.0415592	7.60901e-07	0.0216149	0.46	0.513
ADD1	0.0396156	8.59204e-08	0.00244074	0.348	0.391
SUZ12	0.0365614	1.71636e-06	0.0487567	0.234	0.264
S100A10	0.0352516	6.57337e-10	1.8673e-05	0.847	0.93
PPP1CA	0.0287526	7.94407e-10	2.25667e-05	0.578	0.656
COPA	0.0282977	9.11766e-09	0.000259005	0.265	0.311
NDUFA7	0.0279078	1.75418e-07	0.0049831	0.252	0.293
TMED2	0.0248921	1.18542e-06	0.0336741	0.398	0.451
LCP2	0.0204272	4.5475e-13	1.29181e-08	0.598	0.707
TMEM230	0.0182038	8.81579e-07	0.025043	0.309	0.349
RFC1	0.0143087	1.48822e-06	0.0422758	0.194	0.233
TIFA	0.0105334	2.2232e-07	0.00631544	0.115	0.149
RHOG	0.00653067	1.54365e-07	0.00438505	0.446	0.513
RBBP4	0.00559151	1.82388e-07	0.00518109	0.365	0.422
CSNK1A1	0.00430867	2.93763e-07	0.00834493	0.325	0.38
GADD45GIP1	-0.000746081	1.04429e-06	0.0296652	0.273	0.327
DDOST	-0.00272073	1.60216e-06	0.0455125	0.424	0.483
WAS	-0.00476714	8.39682e-07	0.0238528	0.481	0.547
STOM	-0.00494397	3.44455e-12	9.78493e-08	0.361	0.457
FBRS	-0.00573214	1.24114e-07	0.0035257	0.232	0.283
S100A11	-0.00753509	8.22347e-09	0.000233604	0.844	0.924
HMGA1	-0.00849754	1.56936e-06	0.0445807	0.238	0.288
PDE7A	-0.0101859	1.76337e-07	0.00500921	0.329	0.396
WAC	-0.0126945	5.80587e-07	0.0164927	0.287	0.342
RRN3	-0.0128014	8.70827e-07	0.0247376	0.145	0.18
TGFBR2	-0.0129455	2.33329e-07	0.00662818	0.382	0.45
TRAM1	-0.0160672	1.4992e-06	0.0425879	0.462	0.53
KDSR	-0.016156	2.7612e-09	7.84374e-05	0.203	0.263
RAB11B	-0.0179008	4.61136e-07	0.0130995	0.345	0.408
PPP1CC	-0.0181699	1.59631e-10	4.53463e-06	0.348	0.422
TMCC1	-0.022092	1.67407e-06	0.0475552	0.064	0.089
MON2	-0.0257674	1.60547e-06	0.0456065	0.141	0.178
CCDC85B	-0.0282352	4.01949e-08	0.00114182	0.425	0.5
UBE2D2	-0.0306396	1.05487e-06	0.0299656	0.593	0.673
GID8	-0.0306473	4.07278e-08	0.00115695	0.134	0.178
TM9SF2	-0.0318916	1.01811e-07	0.00289215	0.342	0.414
KHDRBS1	-0.034274	6.13029e-10	1.74143e-05	0.494	0.59
EIF5A	-0.0366839	3.28057e-08	0.000931912	0.47	0.558
FUNDC2	-0.0369489	3.07514e-07	0.00873556	0.216	0.273
SIT1	-0.0393178	7.32337e-07	0.0208035	0.267	0.333
OVCA2	-0.040526	1.02268e-06	0.0290511	0.124	0.166
ADAM17	-0.0413988	2.10233e-07	0.0059721	0.076	0.11
SPCS2	-0.0426173	8.56779e-07	0.0243385	0.473	0.553
ISCU	-0.043319	1.93007e-07	0.00548275	0.491	0.579
PIM1	-0.0445993	3.07956e-10	8.7481e-06	0.38	0.481
RCN2	-0.0472963	3.73168e-07	0.0106006	0.178	0.231
GNAO1	-0.048358	3.43189e-07	0.00974898	0.03	0.056
CERS2	-0.0485937	1.10627e-06	0.0314257	0.225	0.283
LINC00909	-0.0497992	7.56463e-07	0.0214889	0.054	0.088
TRPC4AP	-0.0504927	8.19604e-07	0.0232825	0.179	0.235
RAB6B	-0.0505447	1.00286e-07	0.00284882	0.004	0.024
ARHGAP17	-0.0515385	7.78726e-08	0.00221213	0.101	0.146
TAFA1	-0.0521998	8.15004e-07	0.0231518	0	0.015
SF3B5	-0.0534612	8.12075e-09	0.000230686	0.45	0.541
EEF2KMT	-0.0534796	3.705e-09	0.000105248	0.023	0.053
ARFGAP1	-0.0535687	1.27312e-06	0.0361655	0.041	0.07
CDC14A	-0.0571502	1.29915e-07	0.0036905	0.169	0.23
ATP5MD	-0.0575225	1.06741e-08	0.00030322	0.593	0.696
GLIPR1	-0.058271	7.04707e-07	0.0200186	0.533	0.626
PATJ	-0.0611933	1.08287e-06	0.0307611	0.057	0.094
ZFYVE9	-0.0618554	1.16129e-06	0.0329887	0.002	0.023
ZSWIM1	-0.0624758	7.48884e-07	0.0212736	0.004	0.025
ELF2	-0.0636296	1.2504e-06	0.0355201	0.199	0.262
PNRC1	-0.0647706	1.4692e-07	0.00417355	0.932	0.979
RORA	-0.0652587	5.7803e-09	0.000164201	0.417	0.515
LINC00824	-0.069071	3.89032e-08	0.00110512	0	0.018
INTS6-AS1	-0.0691131	1.1506e-07	0.00326851	0.012	0.04
TRAPPC3	-0.0699539	3.11519e-07	0.00884932	0.214	0.277
AGAP1	-0.0702288	9.31933e-07	0.0264734	0.002	0.025
STX10	-0.0713305	1.64038e-06	0.0465983	0.149	0.203
IMP3	-0.0715454	7.06296e-07	0.0200637	0.302	0.378
EDA	-0.0721287	7.01895e-07	0.0199387	0.001	0.021
PI16	-0.0745802	3.89032e-08	0.00110512	0	0.018
TRIM32	-0.0746437	4.11361e-07	0.0116855	0.017	0.047
FIP1L1	-0.0753569	2.86716e-09	8.14475e-05	0.214	0.285
PIK3CA	-0.0754366	1.2249e-06	0.0347958	0.061	0.104
IGLV3-9	-0.0758884	1.41345e-08	0.000401518	0	0.019
DGCR6L	-0.0760319	5.23932e-07	0.0148833	0.198	0.263
ARHGEF10	-0.0762566	1.43942e-07	0.00408896	0.001	0.025
TMPO	-0.0762578	9.3876e-09	0.000266674	0.279	0.367
HPCAL4	-0.0765558	2.80724e-07	0.00797452	0.005	0.031
DYNLT3	-0.076819	3.53834e-07	0.0100514	0.158	0.216
TARDBP	-0.0790208	1.41617e-06	0.0402291	0.123	0.176
ERH	-0.0802908	3.31178e-07	0.00940778	0.383	0.468
TRPC1	-0.0805968	6.19153e-08	0.00175883	0.001	0.026
HDAC3	-0.0806737	7.6362e-08	0.00216922	0.121	0.175
SH3BP1	-0.0811432	1.56754e-06	0.0445291	0.249	0.319
ELK4	-0.081414	2.34021e-07	0.00664784	0.142	0.199
NT5E	-0.0817673	5.16834e-08	0.00146817	0.001	0.023
TSR3	-0.0823457	1.55761e-06	0.0442471	0.198	0.262
ASAH1	-0.0831014	1.40684e-08	0.00039964	0.132	0.193
SLCO3A1	-0.0843667	2.05795e-09	5.84601e-05	0.074	0.125
AMIGO1	-0.0852538	8.64732e-08	0.00245645	0.001	0.025
DDN-AS1	-0.0852984	3.47935e-07	0.0098838	0.003	0.03
SRSF5	-0.0862934	1.07501e-06	0.0305378	0.81	0.89
ZNF506	-0.0864196	8.6964e-07	0.0247039	0.087	0.135
CCDC65	-0.087272	5.91961e-08	0.00168158	0.003	0.029
ACO1	-0.0878527	5.13563e-07	0.0145888	0.007	0.035
PIP4P2	-0.0878704	6.05181e-07	0.0171914	0.018	0.049
ANKAR	-0.0882754	6.10913e-07	0.0173542	0.029	0.066
RAD21	-0.0883279	8.17202e-07	0.0232142	0.462	0.557
SHQ1	-0.0883406	1.85053e-07	0.0052568	0.028	0.065
NUDCD2	-0.0883908	3.228e-07	0.00916978	0.13	0.188
AHNAK	-0.0889587	4.42178e-08	0.0012561	0.786	0.879
FKBP11	-0.0892425	2.81154e-12	7.98674e-08	0.291	0.395
WDR89	-0.0895718	3.26781e-07	0.00928286	0.02	0.054
AKAP7	-0.0896726	1.995e-07	0.00566719	0.028	0.063
PLCL1	-0.0897511	9.86284e-08	0.00280174	0.005	0.034
AC009133.3	-0.0900807	8.52098e-07	0.0242056	0.007	0.035
LSM8	-0.0901977	4.33419e-08	0.00123121	0.278	0.358
LINC00921	-0.0905321	5.04443e-09	0.000143297	0.008	0.04
FOXP1	-0.0906273	3.00159e-08	0.000852663	0.373	0.473
SNHG10	-0.0913935	1.9478e-07	0.00553312	0.022	0.057
LINC00528	-0.0920551	1.58433e-06	0.0450061	0.003	0.027
CCND3	-0.0922744	1.44602e-06	0.041077	0.391	0.481
PXMP4	-0.0927783	8.60977e-07	0.0244578	0.011	0.042
FDX1	-0.0928326	1.4172e-07	0.00402584	0.184	0.253
LTK	-0.0928567	1.69762e-07	0.00482242	0.017	0.051
CFAP97	-0.0933459	6.57831e-07	0.018687	0.126	0.184
ARHGAP5	-0.0943389	7.31072e-08	0.00207676	0.031	0.072
NOL7	-0.094711	1.13649e-07	0.00322843	0.37	0.463
AC015849.1	-0.0947705	6.36964e-08	0.00180942	0.002	0.029
SRP14-AS1	-0.0950134	5.81658e-07	0.0165232	0.012	0.045
ARHGEF1	-0.0958247	4.87599e-09	0.000138512	0.632	0.741
CDC14B	-0.0959034	3.48726e-11	9.90625e-07	0.012	0.049
ZSCAN26	-0.0959225	1.72113e-06	0.0488922	0.021	0.055
NUP43	-0.0962223	8.94404e-07	0.0254073	0.007	0.035
ZNF775	-0.0963813	5.89348e-07	0.0167416	0.003	0.03
RELA	-0.0963824	2.19506e-11	6.23552e-07	0.248	0.339
KMT5B	-0.0964653	1.10294e-06	0.0313311	0.114	0.168
GOLGA5	-0.0965718	4.09354e-07	0.0116285	0.076	0.127
TRAC	-0.0966512	5.27132e-07	0.0149742	0.388	0.486
C9orf85	-0.0966877	5.72551e-07	0.0162645	0.03	0.071
FBXL14	-0.0973951	1.01823e-06	0.0289249	0.096	0.152
OBSCN	-0.0988146	1.26996e-06	0.0360758	0.012	0.046
USP3	-0.0990498	1.40806e-06	0.0399987	0.275	0.355
ZNF708	-0.0994827	1.86015e-08	0.000528412	0.074	0.126
EIF2A	-0.0996723	1.65483e-06	0.0470087	0.256	0.334
ZNF623	-0.0997331	9.04705e-10	2.57e-05	0.014	0.051
TJP3	-0.099878	5.54903e-07	0.0157631	0.006	0.035
SEC62	-0.100093	8.75595e-07	0.024873	0.443	0.538
RWDD2A	-0.100313	2.01101e-07	0.00571267	0.006	0.037
SNHG16	-0.100505	6.25164e-07	0.017759	0.244	0.322
CCDC112	-0.10061	1.1949e-06	0.0339435	0.008	0.039
RTL8A	-0.101167	3.43324e-07	0.00975281	0.051	0.097
APPBP2	-0.101374	1.703e-06	0.048377	0.076	0.124
SLC40A1	-0.102029	3.26834e-08	0.000928436	0.005	0.035
C21orf91	-0.102682	1.4471e-06	0.0411077	0.154	0.217
KLF3-AS1	-0.103225	3.39749e-09	9.65124e-05	0.002	0.032
USP25	-0.103233	2.62388e-08	0.000745366	0.149	0.217
ELF4	-0.103412	1.01311e-08	0.000287795	0.058	0.109
LINC02591	-0.10344	1.23964e-06	0.0352144	0.01	0.042
ZNF322	-0.103704	4.8209e-07	0.0136947	0.021	0.058
LEF1-AS1	-0.10371	3.61535e-08	0.00102701	0.004	0.034
ZSCAN18	-0.104365	1.51739e-08	0.000431045	0.02	0.059
NAA80	-0.105328	1.58516e-06	0.0450295	0.04	0.082
ZNF500	-0.106029	8.61694e-09	0.000244781	0.006	0.04
ERN1	-0.10609	1.45613e-08	0.000413643	0.27	0.363
XBP1	-0.106306	2.10449e-11	5.97823e-07	0.463	0.592
KCTD7	-0.106326	4.60336e-08	0.00130768	0.045	0.093
RORC	-0.106842	3.06422e-09	8.70453e-05	0.03	0.074
CGGBP1	-0.10693	1.48788e-06	0.0422661	0.241	0.322
SIDT1	-0.107074	7.61531e-09	0.000216328	0.07	0.125
LINC01003	-0.10712	1.39416e-06	0.0396038	0.054	0.102
MAP11	-0.107188	1.31042e-07	0.00372251	0.031	0.073
SSR1	-0.107531	2.04663e-08	0.000581386	0.28	0.367
GPR150	-0.107718	2.27691e-07	0.00646801	0.005	0.034
TSG101	-0.10837	1.34046e-06	0.0380784	0.099	0.154
ZMYND8	-0.108856	6.04854e-07	0.0171821	0.059	0.109
GPHN	-0.108857	6.90555e-08	0.00196166	0.045	0.095
GTF2H2C	-0.109176	5.94483e-09	0.000168875	0.008	0.043
PRKY	-0.109404	1.68827e-06	0.0479588	0.055	0.103
CPNE1	-0.109683	2.52468e-07	0.00717187	0.24	0.323
IL15	-0.110066	1.8105e-07	0.00514308	0.008	0.041
PREPL	-0.110138	8.99291e-07	0.0255462	0.037	0.079
DCTN1	-0.110145	1.65064e-06	0.0468898	0.141	0.205
CHTOP	-0.110233	1.09037e-06	0.0309742	0.121	0.181
AC139530.1	-0.110498	1.5063e-06	0.0427895	0.039	0.082
USP9Y	-0.11054	2.33228e-07	0.0066253	0.054	0.103
SMAGP	-0.11106	3.04105e-08	0.000863871	0.011	0.049
NDUFAF1	-0.111497	3.70618e-07	0.0105281	0.025	0.065
TLR1	-0.111742	6.4535e-07	0.0183325	0.014	0.051
FAF2	-0.111802	1.26392e-09	3.59042e-05	0.041	0.09
IQGAP2	-0.111913	1.6333e-09	4.63971e-05	0.308	0.41
ZYG11B	-0.111932	6.77512e-09	0.000192461	0.013	0.053
MRPS34	-0.112131	4.60977e-07	0.013095	0.235	0.314
IFT20	-0.112398	3.91453e-08	0.001112	0.074	0.128
SOX13	-0.112698	2.08242e-13	5.91553e-09	0	0.032
PRAG1	-0.112728	1.09027e-06	0.0309714	0.03	0.071
AL050341.2	-0.112794	7.89237e-08	0.00224198	0.009	0.045
TTI1	-0.112804	5.33176e-07	0.0151459	0.024	0.065
TTYH2	-0.113019	5.87286e-10	1.6683e-05	0.001	0.032
SH2D3A	-0.113118	4.14824e-07	0.0117839	0.034	0.077
VWA8	-0.113301	1.35703e-07	0.00385493	0.048	0.096
PDCD6	-0.113473	1.48219e-08	0.000421046	0.32	0.418
CD28	-0.113755	6.68962e-07	0.0190032	0.257	0.34
TGDS	-0.113779	5.93449e-07	0.0168581	0.029	0.071
FGFBP2	-0.113783	4.19043e-08	0.00119038	0.001	0.024
SBF2	-0.114476	4.54707e-08	0.00129169	0.014	0.053
LINC02256	-0.115531	8.17559e-10	2.32244e-05	0.014	0.055
PTDSS1	-0.115662	1.4584e-06	0.0414287	0.219	0.297
RAB8A	-0.115884	3.39741e-07	0.00965101	0.232	0.312
SLAMF1	-0.116077	6.10196e-10	1.73338e-05	0.168	0.251
PVRIG	-0.116209	7.87895e-09	0.000223817	0.006	0.04
TIMM21	-0.116861	1.34417e-06	0.0381838	0.026	0.068
DPH7	-0.116931	1.07784e-06	0.0306181	0.073	0.125
AFF1	-0.116983	6.57729e-07	0.0186841	0.128	0.191
RPS6KA5	-0.117183	3.48403e-07	0.00989707	0.111	0.17
CEP63	-0.117305	1.16754e-09	3.31664e-05	0.05	0.105
ZNF680	-0.11744	2.96219e-08	0.00084147	0.012	0.051
SLC26A11	-0.117569	6.9698e-08	0.00197991	0.022	0.064
ENTR1	-0.117675	1.04109e-09	2.95743e-05	0.063	0.12
ARAP3	-0.117694	7.18151e-08	0.00204005	0.009	0.045
LCK	-0.117706	2.17861e-07	0.00618877	0.739	0.835
SLC35E2A	-0.117956	2.57428e-07	0.00731276	0.018	0.058
PFN2	-0.118928	2.32848e-11	6.61451e-07	0.002	0.038
FAM89B	-0.119115	5.49185e-07	0.0156007	0.085	0.144
ZNF557	-0.119297	4.47949e-10	1.27249e-05	0.021	0.066
DCLRE1C	-0.120488	9.1762e-09	0.000260668	0.031	0.08
NIPSNAP1	-0.120673	5.09661e-07	0.0144779	0.077	0.133
FXYD1	-0.120814	1.46652e-06	0.0416594	0.037	0.081
NPEPPS	-0.121061	2.68391e-08	0.000762418	0.168	0.246
TNK1	-0.121201	8.62281e-09	0.000244948	0.008	0.046
EIF1B	-0.121253	1.80603e-08	0.000513038	0.28	0.376
LAT	-0.121514	1.22433e-06	0.0347795	0.533	0.636
LINC00339	-0.121549	3.76354e-07	0.0106911	0.019	0.058
URGCP	-0.121807	7.41069e-08	0.00210516	0.028	0.073
LSM10	-0.121827	1.59713e-06	0.0453698	0.156	0.222
MTO1	-0.121973	2.23501e-07	0.006349	0.068	0.121
ANXA11	-0.122159	4.27817e-07	0.012153	0.508	0.61
EPHX2	-0.122242	6.68968e-08	0.00190034	0.014	0.055
FGFBP3	-0.122345	6.16169e-08	0.00175035	0.013	0.053
AL121839.2	-0.122974	1.23572e-07	0.00351032	0.008	0.042
BRWD1	-0.123068	7.09189e-08	0.00201459	0.188	0.269
AC025159.1	-0.123312	2.84188e-08	0.000807292	0.037	0.085
ACBD4	-0.123351	8.96318e-10	2.54617e-05	0.014	0.057
APTX	-0.123572	1.62122e-07	0.00460539	0.059	0.113
ELK1	-0.123631	1.73312e-06	0.0492326	0.072	0.125
LINC02361	-0.123645	6.08577e-07	0.0172878	0.018	0.058
ALKBH3	-0.124024	1.37558e-06	0.0390762	0.025	0.068
SNAPC3	-0.124147	7.85832e-08	0.00223231	0.029	0.074
ZSWIM9	-0.1245	6.78321e-09	0.000192691	0.014	0.057
OSGEPL1	-0.12499	6.76835e-08	0.00192268	0.01	0.049
RHBDF2	-0.125027	3.97682e-08	0.0011297	0.054	0.105
LYL1	-0.125622	6.29402e-07	0.0178794	0.01	0.043
AC025171.1	-0.126194	3.33711e-11	9.47973e-07	0.012	0.056
NUP107	-0.126727	8.87229e-08	0.00252035	0.097	0.161
TTC39C-AS1	-0.126977	1.41657e-07	0.00402406	0.007	0.04
MAGED2	-0.126985	2.11946e-08	0.000602075	0.218	0.305
SRP72	-0.127087	1.19435e-06	0.033928	0.259	0.344
CCNDBP1	-0.127262	2.87601e-07	0.00816988	0.294	0.382
ZNF181	-0.127536	7.0695e-08	0.00200823	0.018	0.061
TMEM79	-0.128407	2.31225e-08	0.00065684	0.01	0.048
TMTC4	-0.128531	9.33463e-07	0.0265169	0.016	0.055
SBK1	-0.128617	1.23822e-06	0.0351742	0.015	0.054
FYCO1	-0.128786	3.30312e-08	0.000938317	0.081	0.14
GTF2F1	-0.12907	7.69242e-07	0.0218519	0.189	0.267
ZBTB14	-0.129285	1.68831e-07	0.00479598	0.024	0.069
NDUFB10	-0.129529	4.21607e-07	0.0119766	0.413	0.515
B3GALT2	-0.129916	9.12261e-10	2.59146e-05	0.011	0.053
ZNF319	-0.130176	3.03371e-09	8.61786e-05	0.007	0.046
ZKSCAN8	-0.130205	3.23141e-07	0.00917946	0.032	0.079
SPEF2	-0.13073	1.57698e-06	0.0447974	0.021	0.062
SYNM	-0.130889	3.58191e-07	0.0101751	0.012	0.049
ZNF780B	-0.130991	1.56345e-07	0.00444129	0.019	0.063
DNAJC24	-0.131164	8.88363e-10	2.52357e-05	0.023	0.072
L3HYPDH	-0.131179	2.05743e-08	0.000584454	0.014	0.056
GPANK1	-0.131235	3.00533e-08	0.000853724	0.041	0.092
TGFBR3	-0.13154	1.25226e-07	0.00355729	0.135	0.208
MRPL3	-0.131846	9.41335e-08	0.00267405	0.121	0.197
SERPINB9P1	-0.131931	1.27971e-10	3.63526e-06	0.007	0.048
NKAP	-0.13207	3.57676e-07	0.0101605	0.09	0.152
GLRX	-0.132146	4.22784e-08	0.001201	0.205	0.292
ATG4C	-0.132707	2.00793e-07	0.00570394	0.012	0.05
GSTO1	-0.133182	2.34396e-07	0.00665847	0.192	0.272
HELQ	-0.133481	9.31396e-07	0.0264582	0.061	0.114
AC025171.3	-0.133493	2.28026e-08	0.000647754	0.014	0.055
SLC39A10	-0.133675	1.74918e-06	0.0496888	0.054	0.104
NTN4	-0.133951	8.42712e-11	2.39389e-06	0.003	0.039
NAGPA	-0.13398	1.56891e-07	0.00445681	0.045	0.097
DDX19A	-0.134125	1.74148e-06	0.0494703	0.069	0.125
CRYBG3	-0.134151	1.71134e-09	4.8614e-05	0.005	0.041
RPL15	-0.134338	1.26568e-06	0.0359543	0.984	0.995
GTF2H2	-0.134347	3.30806e-08	0.00093972	0.008	0.046
NKTR	-0.13442	5.98495e-07	0.0170014	0.237	0.32
AC005842.1	-0.13454	8.8868e-07	0.0252447	0.012	0.049
DGKD	-0.134546	1.57978e-06	0.044877	0.043	0.093
EIF4EBP2	-0.134571	3.33169e-08	0.000946433	0.216	0.304
WDR75	-0.134585	9.0026e-07	0.0255737	0.075	0.132
GABARAP	-0.134662	2.92351e-10	8.30482e-06	0.691	0.812
CDHR3	-0.134755	1.43033e-07	0.00406313	0.014	0.054
ZNF208	-0.134836	1.47453e-10	4.18869e-06	0.006	0.047
TNRC6C	-0.135096	4.00403e-07	0.0113742	0.063	0.119
TUT1	-0.135258	1.70369e-06	0.0483966	0.03	0.076
ZNF701	-0.135486	3.5198e-08	0.000999869	0.022	0.069
C1orf21	-0.135498	2.37284e-08	0.000674052	0.006	0.039
NHSL2	-0.135568	2.58171e-10	7.33387e-06	0.006	0.046
HEATR5B	-0.136271	4.94926e-09	0.000140594	0.043	0.097
DHRS3	-0.136323	1.27981e-07	0.00363556	0.037	0.086
NPC2	-0.136328	3.71097e-11	1.05418e-06	0.173	0.267
EIF4ENIF1	-0.136604	8.52141e-07	0.0242068	0.023	0.066
POLL	-0.136754	5.67486e-08	0.00161206	0.029	0.078
PRPF19	-0.136757	1.73702e-06	0.0493436	0.123	0.19
RGS10	-0.136807	1.73456e-12	4.92737e-08	0.472	0.605
AC034238.1	-0.136956	7.84602e-07	0.0222882	0.012	0.048
TTC12	-0.136974	1.01633e-08	0.000288708	0.017	0.062
UBASH3A	-0.137228	4.50238e-08	0.00127899	0.116	0.185
RBM26	-0.137286	7.91177e-08	0.0022475	0.131	0.206
PYURF	-0.137342	7.81146e-08	0.002219	0.342	0.444
SYF2	-0.137563	1.00108e-06	0.0284378	0.384	0.482
CARMIL2	-0.137984	1.07934e-06	0.0306608	0.072	0.13
AL080276.2	-0.138004	3.8915e-07	0.0110546	0.016	0.057
ZNF792	-0.138388	3.13498e-07	0.00890555	0.016	0.057
ARID1A	-0.138651	9.40915e-08	0.00267286	0.165	0.245
OIP5-AS1	-0.138704	2.03101e-07	0.00576948	0.174	0.253
SLC35A1	-0.138709	6.58278e-07	0.0186997	0.034	0.082
ZFP62	-0.139164	3.61171e-07	0.0102598	0.012	0.05
MLH3	-0.13923	4.13774e-07	0.0117541	0.017	0.058
AC147067.1	-0.139305	6.18615e-09	0.00017573	0.008	0.047
RPS20	-0.139329	2.80597e-07	0.00797092	0.777	0.867
HDAC7	-0.139369	2.53637e-08	0.000720507	0.096	0.162
EDEM3	-0.139597	1.87412e-11	5.32382e-07	0.097	0.17
ZCCHC3	-0.13967	3.86818e-07	0.0109883	0.05	0.103
RCOR3	-0.139789	1.11009e-07	0.00315344	0.09	0.156
ANKMY1	-0.139813	1.24241e-07	0.00352932	0.037	0.087
DIS3L	-0.139853	6.2057e-07	0.0176285	0.048	0.1
NBPF1	-0.140082	1.65444e-09	4.69977e-05	0.01	0.054
PPP1R3E	-0.140254	7.46163e-09	0.000211963	0.019	0.066
GANC	-0.140269	6.79222e-07	0.0192947	0.021	0.064
TARS2	-0.140318	4.67586e-08	0.00132827	0.025	0.073
USP28	-0.140627	1.01294e-07	0.00287745	0.021	0.066
TUBE1	-0.140975	1.02481e-06	0.0291118	0.03	0.077
ME1	-0.141017	6.05559e-10	1.72021e-05	0.004	0.041
ATR	-0.141289	6.66333e-07	0.0189285	0.085	0.146
VPS50	-0.141425	3.6466e-07	0.0103589	0.03	0.079
RNF187	-0.141446	6.09055e-08	0.00173014	0.224	0.311
ULK3	-0.14158	8.47181e-07	0.0240659	0.1	0.162
Z99127.4	-0.141754	3.05233e-08	0.000867074	0.024	0.074
BAZ2B	-0.141866	1.45603e-08	0.000413614	0.025	0.074
AGK	-0.141949	1.40575e-06	0.0399332	0.048	0.1
RNF144A	-0.142057	3.80015e-12	1.07951e-07	0.003	0.046
RBM4	-0.142095	1.11968e-06	0.0318068	0.267	0.356
RIC3	-0.14214	1.38756e-07	0.00394163	0.013	0.054
RNF14	-0.142547	6.75667e-07	0.0191937	0.065	0.124
TMEM60	-0.142686	1.05278e-07	0.00299063	0.037	0.089
NOL4L	-0.142812	5.37592e-10	1.52714e-05	0.033	0.087
BTBD11	-0.142933	1.0412e-06	0.0295775	0.029	0.076
KRIT1	-0.143169	4.22943e-07	0.0120145	0.082	0.143
TRMT13	-0.143243	1.49485e-09	4.24642e-05	0.016	0.062
PPP3CB-AS1	-0.143445	6.27511e-07	0.0178257	0.017	0.057
CCDC90B	-0.143456	4.87016e-09	0.000138347	0.118	0.192
BORCS6	-0.143578	1.65899e-06	0.047127	0.063	0.121
GNB1L	-0.14407	1.47478e-07	0.0041894	0.025	0.073
RADX	-0.144094	4.45589e-14	1.26579e-09	0.01	0.062
C16orf74	-0.144153	1.05066e-14	2.98462e-10	0.002	0.047
KAT2A	-0.144438	4.2076e-07	0.0119525	0.025	0.071
ZNF611	-0.144664	6.57056e-07	0.018665	0.034	0.084
NLRC5	-0.14475	1.26359e-06	0.0358949	0.174	0.251
SIN3A	-0.144752	5.48499e-07	0.0155812	0.14	0.212
AK9	-0.144768	1.08605e-08	0.000308515	0.012	0.055
ZNF7	-0.144914	5.63862e-08	0.00160176	0.03	0.081
ADAM23	-0.144931	6.36441e-12	1.80794e-07	0.003	0.042
TCEAL4	-0.145011	7.88705e-08	0.00224047	0.026	0.074
ZNF706	-0.145283	3.60283e-11	1.02345e-06	0.316	0.431
CARD8-AS1	-0.145456	1.33841e-08	0.000380203	0.03	0.081
SFR1	-0.145678	3.30299e-07	0.00938281	0.014	0.055
DPP4	-0.14578	9.226e-13	2.62083e-08	0.154	0.252
DPY19L4	-0.145881	8.2927e-07	0.0235571	0.025	0.07
AC027644.3	-0.146047	4.74294e-09	0.000134733	0.034	0.087
MED13L	-0.146107	5.0672e-07	0.0143944	0.103	0.169
TMEM42	-0.146376	2.62494e-07	0.00745667	0.039	0.09
MT-ND4	-0.146717	6.15262e-07	0.0174777	0.85	0.918
TEPSIN	-0.147141	5.01823e-07	0.0142553	0.038	0.088
MMGT1	-0.147603	4.25738e-08	0.00120939	0.15	0.23
ASF1A	-0.147634	2.17807e-09	6.18724e-05	0.184	0.275
KLHL20	-0.147748	8.23217e-08	0.00233851	0.047	0.103
AP1M1	-0.148032	9.73455e-07	0.0276529	0.168	0.247
ENTPD6	-0.148333	4.16302e-09	0.000118259	0.045	0.104
LIN7B	-0.14841	4.69493e-07	0.0133369	0.019	0.063
SELENOM	-0.148502	4.65855e-11	1.32335e-06	0.183	0.279
AC025171.2	-0.148548	6.44323e-09	0.000183033	0.02	0.069
AC093157.1	-0.148595	1.87018e-12	5.31263e-08	0.007	0.055
SNX19	-0.148612	1.26173e-06	0.035842	0.065	0.121
SPRYD7	-0.148682	5.44309e-08	0.00154622	0.017	0.062
TMEM251	-0.148719	2.05155e-09	5.82783e-05	0.031	0.086
NTAN1	-0.148937	5.73388e-07	0.0162882	0.09	0.153
AZI2	-0.149181	7.88588e-07	0.0224014	0.118	0.189
CCNB1IP1	-0.149189	5.51607e-08	0.00156695	0.072	0.135
MRPS5	-0.14927	6.79907e-10	1.93141e-05	0.126	0.207
SPNS1	-0.149327	1.01389e-06	0.0288015	0.088	0.152
ZNF337	-0.149697	1.92825e-08	0.000547758	0.017	0.063
AP3M1	-0.149782	1.04834e-06	0.0297802	0.07	0.129
RIOX2	-0.149835	1.07266e-10	3.04711e-06	0.016	0.068
GBP3	-0.149993	3.36193e-07	0.00955024	0.061	0.119
AAMP	-0.150002	2.05959e-10	5.85068e-06	0.146	0.231
ZNF287	-0.150065	1.46557e-08	0.000416323	0.014	0.058
R3HCC1L	-0.150286	1.83194e-07	0.005204	0.028	0.078
ABCA5	-0.150443	1.57516e-07	0.00447457	0.017	0.061
GMPPA	-0.150449	7.25687e-10	2.06146e-05	0.04	0.096
NAP1L4	-0.150601	7.37536e-10	2.09512e-05	0.367	0.487
CDPF1	-0.150798	5.31219e-09	0.000150903	0.009	0.05
PKN1	-0.150916	9.52813e-07	0.0270665	0.301	0.396
FAM78A	-0.151037	9.98619e-08	0.00283678	0.039	0.092
ZNF692	-0.151304	9.48581e-07	0.0269463	0.023	0.066
RNF130	-0.151633	2.54549e-10	7.23098e-06	0.02	0.072
ZC3H8	-0.151773	9.07683e-07	0.0257846	0.063	0.121
SLAIN1	-0.151816	9.32187e-08	0.00264806	0.054	0.112
ST6GALNAC2	-0.15204	3.65734e-12	1.03894e-07	0.003	0.043
ZNF251	-0.152193	2.76032e-08	0.000784123	0.032	0.086
TRABD2A	-0.152305	1.03961e-09	2.95323e-05	0.038	0.096
FBLN5	-0.152549	2.48259e-08	0.000705228	0.015	0.061
MYL12A	-0.153064	2.91511e-12	8.28094e-08	0.882	0.961
DALRD3	-0.153086	7.97565e-07	0.0226564	0.073	0.134
DDX5	-0.153324	1.35417e-10	3.84678e-06	0.952	0.987
GNPAT	-0.153483	1.11358e-08	0.000316335	0.092	0.162
EVI2B	-0.153797	1.80138e-12	5.11719e-08	0.471	0.611
DNAJA3	-0.154236	1.04736e-08	0.000297523	0.039	0.095
POLR2I	-0.154544	7.62646e-08	0.00216645	0.213	0.3
ZFP14	-0.154598	4.35651e-08	0.00123755	0.02	0.068
PCSK1N	-0.154685	2.34867e-10	6.67186e-06	0.006	0.047
VPS26B	-0.154695	6.93684e-08	0.00197055	0.144	0.224
UQCC3	-0.154904	1.00219e-06	0.0284693	0.068	0.128
PRPF8	-0.154998	1.16381e-06	0.0330603	0.39	0.493
SETDB1	-0.155033	3.78638e-08	0.0010756	0.041	0.097
SPIN2B	-0.155069	2.66158e-08	0.000756076	0.016	0.062
SNHG14	-0.155131	3.09532e-07	0.00879288	0.036	0.088
KCTD2	-0.155184	9.92778e-07	0.0282018	0.028	0.076
AL450998.2	-0.15525	2.10356e-07	0.00597559	0.034	0.086
LENG1	-0.155291	5.61028e-08	0.00159371	0.111	0.183
NUAK2	-0.155619	9.46695e-17	2.68928e-12	0.004	0.054
RTP4	-0.155676	1.66151e-06	0.0471984	0.028	0.074
RNF4	-0.155697	1.65692e-06	0.0470682	0.206	0.291
UNC50	-0.15624	2.03051e-07	0.00576808	0.072	0.137
ARMT1	-0.156546	5.17052e-07	0.0146879	0.033	0.085
ZC3H3	-0.156607	7.47927e-07	0.0212464	0.039	0.092
PINK1	-0.156663	2.96968e-08	0.000843597	0.047	0.106
PDE6D	-0.15674	5.51483e-07	0.015666	0.103	0.17
UST	-0.156755	2.87926e-07	0.00817912	0.02	0.065
SPG21	-0.156935	1.33525e-07	0.00379304	0.151	0.23
SRP68	-0.157042	1.02253e-08	0.00029047	0.111	0.186
UMAD1	-0.157063	1.42227e-07	0.00404024	0.085	0.151
THAP5	-0.157101	6.12438e-07	0.0173975	0.045	0.098
MAP2K2	-0.157322	1.12495e-06	0.0319564	0.298	0.394
SDHAF3	-0.157377	2.16623e-08	0.00061536	0.061	0.124
ZNF75A	-0.157599	4.51021e-09	0.000128122	0.037	0.094
KEAP1	-0.157821	8.01139e-08	0.00227579	0.099	0.168
DDX59	-0.157944	2.08571e-07	0.00592487	0.067	0.132
KCTD18	-0.158025	2.46474e-08	0.000700159	0.039	0.095
RAD51-AS1	-0.158085	1.69825e-08	0.000482421	0.019	0.069
SMG7	-0.158216	1.2248e-06	0.0347928	0.079	0.142
HEIH	-0.158367	1.35805e-07	0.00385782	0.048	0.104
ZCCHC9	-0.158643	1.65458e-07	0.00470017	0.056	0.116
MTRES1	-0.158656	5.34781e-08	0.00151915	0.028	0.081
CLIP4	-0.158897	9.48764e-07	0.0269515	0.088	0.153
PATZ1	-0.158955	5.29027e-10	1.50281e-05	0.035	0.094
FMN1	-0.159224	3.54015e-12	1.00565e-07	0.004	0.048
SIMC1	-0.159612	1.46316e-07	0.00415639	0.038	0.094
ZRSR2	-0.159795	4.83799e-08	0.00137433	0.105	0.178
COQ8A	-0.159812	1.62436e-07	0.00461431	0.037	0.092
ZBTB44	-0.159864	1.433e-08	0.000407071	0.083	0.153
B3GNT9	-0.159885	1.93276e-11	5.4904e-07	0.013	0.064
SLC7A6	-0.15995	9.42045e-07	0.0267607	0.103	0.172
CLUAP1	-0.160301	3.14338e-11	8.92939e-07	0.012	0.063
ZNF816	-0.160463	2.60318e-10	7.39487e-06	0.017	0.07
SPSB2	-0.160502	4.14282e-10	1.17685e-05	0.012	0.062
SLC25A6	-0.160699	9.66975e-08	0.00274689	0.723	0.825
ZNF626	-0.160721	2.55151e-08	0.000724809	0.021	0.071
LIPT1	-0.16082	2.90227e-11	8.24447e-07	0.009	0.057
POGK	-0.160937	1.94008e-07	0.0055112	0.079	0.144
ATXN2	-0.161245	1.45986e-06	0.0414703	0.076	0.138
ZNF3	-0.16186	2.82216e-07	0.00801691	0.028	0.079
MRPS23	-0.162004	1.37629e-06	0.0390962	0.081	0.144
45723	-0.162006	3.90395e-07	0.0110899	0.235	0.328
PRKCQ	-0.162057	8.62333e-10	2.44963e-05	0.144	0.231
DCAF15	-0.162357	1.14819e-06	0.0326167	0.115	0.185
OCIAD1	-0.16243	5.88115e-08	0.00167066	0.32	0.427
PSMB9	-0.162436	3.57002e-10	1.01414e-05	0.62	0.747
TMCO6	-0.162519	1.4644e-09	4.15993e-05	0.023	0.078
AIP	-0.162526	1.14989e-06	0.0326649	0.3	0.397
CASP2	-0.162534	6.62047e-07	0.0188068	0.037	0.09
CYB561D2.1	-0.162536	6.39311e-08	0.00181609	0.031	0.082
KLHL9	-0.162609	6.60704e-07	0.0187686	0.09	0.157
CNOT7	-0.16271	2.87406e-07	0.00816434	0.223	0.312
TSGA10	-0.162715	5.61703e-11	1.59563e-06	0.008	0.054
TRIM52	-0.162757	1.69543e-06	0.0481622	0.049	0.104
WNT7A	-0.162772	7.22861e-16	2.05343e-11	0.001	0.048
ZNF641	-0.163211	5.43384e-08	0.00154359	0.024	0.076
AC097534.2	-0.163236	5.50364e-10	1.56342e-05	0.014	0.064
ZNF559	-0.163475	4.63622e-08	0.00131701	0.02	0.069
ZNF624	-0.163559	1.89221e-11	5.37521e-07	0.01	0.058
ACSL6	-0.16366	2.16726e-09	6.15653e-05	0.019	0.07
GNB2	-0.163792	2.21235e-09	6.28462e-05	0.48	0.605
PDGFB	-0.16408	5.94051e-11	1.68752e-06	0.006	0.048
ARMC10	-0.164189	8.12859e-07	0.0230909	0.076	0.14
SCYL3	-0.164196	1.41086e-08	0.000400782	0.035	0.093
NUP62	-0.164389	1.2394e-06	0.0352078	0.081	0.144
GLOD4	-0.164515	8.57332e-09	0.000243542	0.155	0.241
HSH2D	-0.164557	1.26008e-08	0.000357951	0.06	0.126
ELP2	-0.164603	1.24285e-09	3.53057e-05	0.116	0.197
CUTC	-0.164682	1.32879e-08	0.000377469	0.088	0.16
BET1	-0.164746	1.33754e-07	0.00379955	0.042	0.1
WDR45	-0.16481	3.04295e-07	0.00864411	0.119	0.195
TNFRSF25	-0.164869	1.98206e-14	5.63045e-10	0.241	0.364
IPCEF1	-0.16499	1.82548e-08	0.000518564	0.063	0.128
HMGN3	-0.165332	1.20267e-06	0.0341642	0.263	0.357
MYBL1	-0.165482	5.66124e-09	0.000160819	0.061	0.127
ANTXR2	-0.165581	5.02156e-09	0.000142648	0.145	0.232
GLT8D1	-0.165705	1.9562e-09	5.55697e-05	0.072	0.143
KRBOX4	-0.165871	2.10049e-11	5.96687e-07	0.035	0.098
ORC2	-0.165877	1.26656e-07	0.00359793	0.043	0.1
B3GALT4	-0.165903	1.35566e-06	0.0385102	0.041	0.095
TRIM34	-0.166012	6.90363e-09	0.000196111	0.016	0.064
TADA1	-0.166192	6.67211e-14	1.89535e-09	0.016	0.073
CLCF1	-0.166693	8.12562e-11	2.30825e-06	0.011	0.061
GMFG	-0.166745	1.00698e-06	0.0286053	0.755	0.844
PHF10	-0.166777	3.8515e-07	0.010941	0.083	0.15
GTPBP10	-0.166803	1.80742e-10	5.13435e-06	0.05	0.116
DHX58	-0.166935	1.57861e-07	0.00448435	0.027	0.078
REPS1	-0.166963	1.20078e-06	0.0341105	0.114	0.185
SDHAF2	-0.16717	1.27735e-09	3.62858e-05	0.22	0.323
HOMEZ	-0.167456	6.68252e-11	1.8983e-06	0.014	0.068
TGFBRAP1	-0.167605	7.87031e-07	0.0223572	0.053	0.111
BOD1L1	-0.167665	5.05417e-07	0.0143574	0.266	0.363
IFIT2	-0.167694	4.8882e-08	0.00138859	0.017	0.063
PIH1D1	-0.167723	9.39447e-10	2.66869e-05	0.158	0.247
P4HB	-0.167843	7.44856e-09	0.000211591	0.469	0.594
POP5	-0.167929	1.21641e-06	0.0345546	0.106	0.176
ABCB1	-0.168014	6.49496e-10	1.84502e-05	0.061	0.129
LDOC1	-0.168302	7.30063e-07	0.0207389	0.028	0.077
SATB1-AS1	-0.168541	4.55985e-09	0.000129532	0.013	0.059
HINT1	-0.168579	5.12285e-09	0.000145525	0.872	0.939
TSEN34	-0.168584	2.50171e-07	0.00710661	0.08	0.146
BBS2	-0.168753	2.42613e-11	6.8919e-07	0.03	0.093
ZNF48	-0.168757	5.15209e-08	0.00146355	0.022	0.072
IMMP1L	-0.168981	5.3382e-07	0.0151642	0.039	0.094
PAXIP1-AS2	-0.169056	2.12682e-10	6.04165e-06	0.012	0.062
THAP12	-0.169152	1.10844e-07	0.00314875	0.139	0.22
ZNF143	-0.169181	3.3271e-07	0.00945128	0.064	0.127
HERC4	-0.169405	1.22217e-07	0.00347182	0.079	0.146
WWP1	-0.169465	1.02661e-09	2.9163e-05	0.085	0.16
CNOT11	-0.169668	5.2068e-07	0.014791	0.101	0.173
TAZ	-0.169715	4.63632e-08	0.00131704	0.136	0.216
METTL18	-0.169753	9.80051e-08	0.00278403	0.03	0.084
ZC3H13	-0.169836	5.93435e-09	0.000168577	0.15	0.241
RGL2	-0.169861	2.36977e-10	6.73182e-06	0.038	0.101
PNN	-0.16994	1.68772e-07	0.0047943	0.281	0.384
NDUFAF3	-0.170032	5.34771e-08	0.00151912	0.192	0.283
SNHG9	-0.170195	2.50186e-07	0.00710702	0.094	0.161
MAF1	-0.170272	8.83695e-09	0.000251031	0.26	0.364
POGZ	-0.170342	6.44023e-08	0.00182948	0.058	0.121
U2SURP	-0.170353	3.17066e-09	9.00689e-05	0.254	0.359
SNHG30	-0.170547	2.97232e-07	0.00844346	0.057	0.118
DCAF10	-0.170569	4.50825e-07	0.0128066	0.054	0.116
STX2	-0.170865	1.09628e-06	0.0311419	0.052	0.111
ACD	-0.170869	3.17214e-07	0.00901111	0.105	0.177
PTGDR	-0.17088	4.71904e-07	0.0134054	0.016	0.056
MAST3	-0.17096	1.62553e-08	0.000461764	0.03	0.085
JAK1	-0.171183	2.04589e-09	5.81176e-05	0.675	0.795
ARFRP1	-0.171661	1.28663e-08	0.000365493	0.07	0.14
TRDMT1	-0.171689	1.60454e-09	4.55802e-05	0.052	0.117
COASY	-0.17175	3.35343e-07	0.0095261	0.07	0.136
USP19	-0.171824	1.60375e-08	0.000455577	0.042	0.102
PPP2R3B	-0.171863	4.1901e-08	0.00119028	0.025	0.077
AKIP1	-0.171963	1.19834e-08	0.000340413	0.05	0.113
TRMT10B	-0.171995	1.1815e-06	0.0335629	0.032	0.081
C2orf68	-0.172055	1.55058e-07	0.00440472	0.039	0.096
NR3C2	-0.172245	4.70343e-15	1.3361e-10	0.009	0.064
LIX1L	-0.172451	2.72101e-08	0.000772956	0.214	0.31
CD37	-0.172571	5.47141e-07	0.0155426	0.826	0.897
HAUS1	-0.172614	1.85335e-07	0.0052648	0.054	0.117
FBXL4	-0.172686	4.04257e-08	0.00114837	0.037	0.095
GCSAM	-0.172923	7.96193e-14	2.26175e-09	0.01	0.065
REST	-0.173101	4.43769e-08	0.00126062	0.296	0.404
AL109741.1	-0.173611	6.61215e-16	1.87831e-11	0.004	0.056
TLE4	-0.173735	9.1045e-07	0.0258631	0.123	0.197
DCAF5	-0.174074	3.65256e-08	0.00103758	0.17	0.261
ARV1	-0.17441	2.7061e-08	0.000768721	0.031	0.088
TNRC6A	-0.174875	4.86377e-08	0.00138165	0.07	0.138
NSF	-0.174961	5.26415e-08	0.00149539	0.111	0.188
USP45	-0.175008	2.11137e-09	5.99776e-05	0.021	0.076
PPIL2	-0.175113	8.11116e-07	0.0230414	0.083	0.15
ING5	-0.175285	1.08979e-06	0.0309576	0.066	0.129
UTY	-0.175317	1.85348e-07	0.00526518	0.056	0.117
TNFAIP8L1	-0.175381	7.68514e-09	0.000218312	0.021	0.073
ZBTB24	-0.175401	2.09247e-07	0.00594407	0.093	0.164
TNIP1	-0.175701	1.27407e-06	0.0361925	0.332	0.435
MSTO1	-0.176064	5.1183e-08	0.00145396	0.031	0.087
TRNT1	-0.176101	2.93692e-10	8.34291e-06	0.063	0.136
PPP1R7	-0.176275	3.12367e-07	0.00887341	0.241	0.338
SMIM20	-0.176303	1.19441e-10	3.39295e-06	0.064	0.138
ZNF671	-0.176308	1.00491e-11	2.85466e-07	0.01	0.063
TRAK2	-0.176383	5.341e-07	0.0151722	0.074	0.141
LINC00243	-0.176429	1.44319e-12	4.09968e-08	0.009	0.061
ZNF721	-0.176484	8.90559e-07	0.0252981	0.118	0.192
TFB1M	-0.176504	9.70235e-13	2.75615e-08	0.025	0.089
EIF4E3	-0.176596	1.59456e-09	4.52967e-05	0.157	0.249
TBCCD1	-0.176717	4.21665e-10	1.19782e-05	0.03	0.092
USP21	-0.176842	4.41301e-08	0.0012536	0.036	0.094
PRIM1	-0.1769	1.00253e-07	0.00284788	0.03	0.084
PLEKHB1	-0.177098	5.09463e-15	1.44723e-10	0.017	0.079
RBL1	-0.1773	8.01466e-10	2.27673e-05	0.057	0.127
DUT	-0.177574	9.18398e-08	0.00260889	0.295	0.402
GDI1	-0.177643	1.50819e-07	0.00428431	0.289	0.392
FAM120B	-0.177919	2.21776e-11	6.29998e-07	0.103	0.188
SLC17A5	-0.177922	8.99282e-10	2.55459e-05	0.036	0.098
PA2G4	-0.177999	2.33847e-07	0.0066429	0.371	0.481
EXOSC8	-0.178251	1.12343e-06	0.0319131	0.094	0.164
VPS4A	-0.178262	4.2314e-07	0.0120201	0.114	0.19
PDHB	-0.178307	8.12331e-07	0.0230759	0.136	0.215
OMA1	-0.178407	1.63316e-09	4.63932e-05	0.028	0.085
TUT4	-0.178462	1.52579e-08	0.000433432	0.204	0.3
HDHD3	-0.178506	3.42487e-09	9.72902e-05	0.051	0.118
TMA7	-0.178733	5.8884e-13	1.67272e-08	0.922	0.977
STAT2	-0.178777	7.47069e-09	0.00021222	0.09	0.168
IARS2	-0.17879	1.07004e-06	0.0303965	0.134	0.212
CASP6	-0.178854	1.05129e-10	2.98639e-06	0.034	0.1
NAA10	-0.179143	2.06971e-08	0.000587942	0.041	0.103
SNUPN	-0.179188	1.43191e-07	0.00406762	0.032	0.087
KIZ	-0.17934	7.28187e-08	0.00206856	0.059	0.125
RNFT1	-0.179584	5.35707e-07	0.0152178	0.052	0.113
SLC35E2B	-0.179645	1.18061e-09	3.35375e-05	0.048	0.114
MED11	-0.179742	1.26813e-08	0.000360238	0.037	0.097
ZNF146	-0.179867	1.16455e-08	0.000330814	0.121	0.204
PPM1K	-0.179919	1.23465e-08	0.000350728	0.131	0.217
ZNF76	-0.179931	8.95895e-08	0.00254497	0.052	0.116
HGS	-0.179951	1.30056e-06	0.036945	0.138	0.216
CEP192	-0.179975	2.59276e-08	0.000736525	0.04	0.1
NIT1	-0.180103	4.90737e-10	1.39404e-05	0.045	0.11
MRPL57	-0.180193	2.78009e-09	7.89739e-05	0.288	0.403
ZNF808	-0.180368	4.3352e-08	0.0012315	0.057	0.124
PDCD4-AS1	-0.180695	9.05688e-08	0.00257279	0.035	0.092
RDH14	-0.180904	1.17943e-07	0.0033504	0.054	0.118
MRPS10	-0.181327	2.81364e-10	7.9927e-06	0.07	0.145
KLHL22	-0.181345	1.91545e-09	5.44122e-05	0.029	0.089
ANKZF1	-0.181622	1.05827e-10	3.00621e-06	0.085	0.164
ZXDC	-0.181693	5.33341e-09	0.000151506	0.079	0.152
TPD52L2	-0.181724	2.4913e-07	0.00707702	0.084	0.154
AL365361.1	-0.181747	1.8147e-09	5.15502e-05	0.03	0.09
RNF220	-0.181969	1.39733e-06	0.0396941	0.217	0.308
STX17	-0.182	4.83909e-07	0.0137464	0.086	0.156
LAMTOR4	-0.182093	1.63937e-09	4.65696e-05	0.431	0.561
ESD	-0.182189	6.63848e-09	0.000188579	0.144	0.235
SESN1	-0.182209	5.26734e-08	0.00149629	0.05	0.113
LOXL1-AS1	-0.18238	1.82552e-07	0.00518576	0.039	0.097
CNOT3	-0.182613	7.38496e-08	0.00209785	0.076	0.148
UBLCP1	-0.182708	1.67258e-08	0.000475131	0.125	0.208
DDX42	-0.182834	1.65957e-07	0.00471434	0.101	0.176
TTC9C	-0.183127	8.53464e-10	2.42444e-05	0.018	0.071
ZNF414	-0.183134	1.15913e-09	3.29274e-05	0.063	0.136
NSMCE1	-0.183184	3.5644e-07	0.0101254	0.15	0.235
TRIM69	-0.183496	1.4546e-06	0.0413208	0.108	0.181
PTPN4	-0.183871	1.53688e-08	0.000436581	0.143	0.23
SEC24C	-0.18393	4.57333e-09	0.000129915	0.09	0.168
AC073111.4	-0.183987	1.59831e-07	0.00454032	0.04	0.098
PRPSAP2	-0.184228	3.31008e-08	0.000940294	0.068	0.137
DGLUCY	-0.184307	7.79882e-08	0.00221541	0.072	0.141
AC243829.1	-0.184308	2.54516e-09	7.23003e-05	0.03	0.088
RPS6KA4	-0.184361	2.97903e-08	0.000846254	0.065	0.134
EPS15L1	-0.184704	5.84696e-09	0.000166095	0.063	0.135
RBM43	-0.184857	5.19993e-11	1.47714e-06	0.023	0.082
PMS1	-0.184885	3.97418e-08	0.00112895	0.049	0.113
PGLS	-0.184961	1.12614e-08	0.000319903	0.183	0.28
MRPS35	-0.185142	1.89266e-07	0.00537649	0.101	0.177
PMPCB	-0.185462	9.8124e-08	0.00278741	0.19	0.285
IGLV2-14	-0.185578	6.72632e-08	0.00191075	0.017	0.063
SUN1	-0.185635	6.91494e-08	0.00196433	0.054	0.119
TES	-0.185723	3.30014e-08	0.00093747	0.214	0.314
GOLGA7	-0.185817	8.50436e-08	0.00241583	0.274	0.379
CTDSP2	-0.186048	1.14836e-10	3.26215e-06	0.177	0.28
CHST12	-0.186267	9.36902e-08	0.00266146	0.135	0.219
ECE1	-0.186362	5.7333e-07	0.0162866	0.071	0.137
SMIM14	-0.186368	6.76402e-09	0.000192145	0.052	0.118
NIFK	-0.186589	2.65441e-10	7.54038e-06	0.121	0.212
OGFR	-0.186727	7.3571e-07	0.0208993	0.208	0.301
SNRNP40	-0.187063	7.29427e-08	0.00207208	0.143	0.228
GK5	-0.187121	2.68598e-11	7.63006e-07	0.048	0.12
NELL2	-0.187156	5.72084e-09	0.000162512	0.183	0.278
AIDA	-0.187349	2.3792e-07	0.00675858	0.087	0.159
ARPC1A	-0.187374	1.55236e-07	0.0044098	0.091	0.166
IGFBP3	-0.187444	1.59277e-09	4.52458e-05	0.015	0.065
TMEM203	-0.187566	9.45925e-07	0.0268709	0.105	0.177
PRPF6	-0.187639	1.33072e-12	3.78017e-08	0.183	0.294
MRPL23	-0.187811	5.83533e-09	0.000165764	0.042	0.105
DEXI	-0.188074	1.21358e-08	0.000344741	0.073	0.146
WDTC1	-0.188122	1.7393e-06	0.0494083	0.071	0.136
SEMA4C	-0.18818	3.80489e-09	0.000108086	0.031	0.092
GRAP	-0.188248	1.92134e-12	5.45794e-08	0.01	0.065
PUF60	-0.188327	8.99566e-11	2.5554e-06	0.303	0.426
ZMAT1	-0.188392	4.69782e-11	1.33451e-06	0.014	0.069
ZNF862	-0.188686	2.13655e-07	0.00606929	0.048	0.109
LMBR1L	-0.189089	4.33933e-07	0.0123267	0.072	0.14
BMI1	-0.189208	6.68872e-13	1.90007e-08	0.103	0.195
KBTBD3	-0.189228	2.36893e-09	6.72941e-05	0.036	0.1
ASB8	-0.189319	1.71967e-10	4.88506e-06	0.068	0.144
SAT2	-0.189564	1.83176e-08	0.000520348	0.115	0.198
KDM5D	-0.189641	3.25647e-08	0.000925064	0.037	0.095
C6orf47	-0.189642	1.23037e-06	0.0349511	0.061	0.125
ZFP90	-0.190562	3.7754e-09	0.000107248	0.06	0.132
SNAI3	-0.190756	3.39795e-07	0.00965255	0.046	0.106
TMEM71	-0.190926	3.20975e-07	0.00911793	0.074	0.143
LIN37	-0.191105	5.85333e-09	0.000166275	0.042	0.108
ACP1	-0.191235	1.30722e-10	3.71342e-06	0.252	0.367
NUDT22	-0.191263	1.74946e-09	4.96969e-05	0.108	0.192
VPS36	-0.191588	4.23873e-07	0.012041	0.152	0.237
ZER1	-0.191823	3.9406e-09	0.000111941	0.061	0.133
LYPLAL1	-0.192125	6.72402e-09	0.000191009	0.026	0.082
MLLT10	-0.192363	3.97103e-09	0.000112805	0.107	0.189
SSBP2	-0.192547	6.47044e-10	1.83806e-05	0.05	0.12
CTC1	-0.192702	5.53813e-09	0.000157322	0.076	0.152
COPS5	-0.192766	3.06911e-07	0.00871841	0.173	0.263
FUT7	-0.192775	3.08825e-12	8.77278e-08	0.008	0.059
CES2	-0.192974	1.60726e-10	4.56574e-06	0.041	0.11
DIMT1	-0.193013	3.17552e-08	0.000902069	0.105	0.184
PAXIP1-AS1	-0.193301	1.12587e-10	3.19825e-06	0.019	0.078
RASGRF2	-0.193426	3.18274e-16	9.04121e-12	0.012	0.077
PDE3B	-0.193487	2.59709e-11	7.37754e-07	0.267	0.392
CRTAP	-0.193671	1.07212e-08	0.000304556	0.177	0.273
SLAMF7	-0.194024	3.53418e-14	1.00395e-09	0.015	0.078
PRPSAP1	-0.194148	1.50954e-06	0.0428814	0.082	0.15
CLCN3	-0.194556	1.78125e-09	5.06e-05	0.056	0.128
AC012645.3	-0.194906	2.84777e-12	8.08965e-08	0.025	0.09
SARS	-0.195071	3.68183e-07	0.010459	0.208	0.304
EPN1	-0.195107	4.22968e-07	0.0120153	0.105	0.183
ZNF397	-0.195332	3.98794e-10	1.13285e-05	0.018	0.073
NCK1	-0.195549	1.97067e-07	0.00559808	0.127	0.208
RPL37A	-0.196018	4.89341e-14	1.39007e-09	0.989	0.997
RBM6	-0.19607	2.69566e-09	7.65757e-05	0.185	0.287
ZNF430	-0.196257	3.52619e-08	0.00100168	0.112	0.196
RARG	-0.196389	1.27388e-11	3.61871e-07	0.021	0.082
COA5	-0.19648	1.64216e-07	0.0046649	0.061	0.129
LMBRD1	-0.196661	1.28985e-07	0.00366408	0.238	0.34
SPON1	-0.196767	4.7975e-17	1.36283e-12	0.004	0.061
COG3	-0.196894	1.27127e-08	0.000361129	0.141	0.229
CTSF	-0.197016	2.88141e-15	8.18523e-11	0.008	0.068
GAB3	-0.197302	1.8659e-10	5.30045e-06	0.068	0.145
TIMM9	-0.197487	5.88719e-09	0.000167237	0.069	0.144
DPH5	-0.197605	3.27573e-10	9.30536e-06	0.023	0.082
CELF1	-0.197842	8.15297e-09	0.000231602	0.125	0.213
MXRA7	-0.198112	9.59295e-08	0.00272507	0.201	0.301
ARL16	-0.198173	2.02539e-08	0.000575352	0.077	0.152
VAT1	-0.198243	2.48741e-08	0.000706597	0.067	0.14
SH3YL1	-0.198264	4.97453e-11	1.41312e-06	0.039	0.109
CPTP	-0.19832	1.05141e-11	2.98673e-07	0.043	0.117
ATG16L2	-0.198373	1.44344e-06	0.0410038	0.073	0.14
TACO1	-0.198393	1.03071e-09	2.92794e-05	0.041	0.11
ORC4	-0.198423	2.4853e-08	0.000705998	0.057	0.126
MEGF6	-0.198444	1.02037e-10	2.89855e-06	0.028	0.09
FAM98C	-0.198719	1.1712e-11	3.32702e-07	0.065	0.145
RNF26	-0.198734	1.30477e-13	3.70647e-09	0.022	0.088
ARAP1	-0.19892	5.18682e-07	0.0147342	0.085	0.158
NCBP2	-0.19904	3.70517e-09	0.000105253	0.108	0.195
DNAJB2	-0.199116	1.42168e-06	0.0403857	0.078	0.146
SLC39A13	-0.199124	4.4394e-09	0.00012611	0.061	0.134
AC111182.1	-0.199674	1.67483e-10	4.75769e-06	0.025	0.086
TRIM65	-0.199958	5.08116e-12	1.4434e-07	0.019	0.082
SYPL1	-0.200261	8.45392e-07	0.024015	0.159	0.246
MAD1L1	-0.20038	1.90894e-07	0.00542273	0.125	0.208
ERCC5	-0.200543	1.52502e-09	4.33213e-05	0.185	0.287
UPP1	-0.200609	4.46591e-09	0.000126863	0.185	0.287
CCDC130	-0.200911	2.8189e-10	8.00765e-06	0.078	0.159
SNHG3	-0.201155	1.04638e-07	0.00297246	0.121	0.205
AIMP1	-0.201398	1.15872e-06	0.0329156	0.187	0.278
APIP	-0.201518	5.8343e-07	0.0165735	0.049	0.109
FMNL1	-0.201603	3.45617e-09	9.81793e-05	0.447	0.577
DLGAP1-AS1	-0.201606	1.74883e-07	0.00496789	0.067	0.134
DTWD1	-0.201696	4.77331e-09	0.000135595	0.034	0.096
ERGIC2	-0.201883	4.79164e-07	0.0136116	0.171	0.261
MCTP2	-0.201926	1.27275e-13	3.61551e-09	0.03	0.102
VPS33A	-0.201928	3.8023e-08	0.00108012	0.092	0.172
BFAR	-0.202144	4.05899e-08	0.00115304	0.123	0.209
TMEM250	-0.202237	2.07107e-09	5.88327e-05	0.055	0.127
ZNF600	-0.202572	1.32333e-07	0.00375919	0.068	0.138
SCAMP1-AS1	-0.202592	2.4238e-11	6.8853e-07	0.022	0.086
CYB561A3	-0.202674	1.03483e-08	0.000293964	0.055	0.126
Z93930.2	-0.202858	1.58492e-11	4.50229e-07	0.021	0.084
RNPC3	-0.202961	2.0728e-10	5.88821e-06	0.119	0.212
TRIM38	-0.203159	1.31814e-07	0.00374444	0.13	0.216
MDP1	-0.203449	7.25395e-09	0.000206063	0.039	0.104
MRPL38	-0.20352	7.34161e-09	0.000208553	0.134	0.227
TPP2	-0.203552	1.73396e-07	0.00492565	0.162	0.253
MOB3A	-0.203578	4.06179e-07	0.0115383	0.105	0.183
TLNRD1	-0.203697	8.13036e-08	0.00230959	0.074	0.146
TFAM	-0.203724	2.57574e-07	0.00731689	0.138	0.224
MT-ND4L	-0.203809	1.04277e-11	2.9622e-07	0.947	0.981
NFATC3	-0.203971	2.18641e-07	0.00621094	0.196	0.292
EAPP	-0.204015	1.91939e-08	0.000545241	0.259	0.372
HDAC2	-0.204408	1.13997e-06	0.0323831	0.116	0.196
BAZ2A	-0.204461	3.15974e-08	0.000897588	0.183	0.281
NAE1	-0.204745	1.59698e-06	0.0453655	0.101	0.175
OARD1	-0.204888	9.41803e-07	0.0267538	0.076	0.145
ZFPM1	-0.204923	1.42375e-06	0.0404446	0.089	0.16
ADAM8	-0.205289	1.9774e-09	5.6172e-05	0.234	0.346
SCAMP2	-0.205529	1.68297e-08	0.000478083	0.297	0.412
TCEAL8	-0.20578	2.79561e-10	7.94149e-06	0.05	0.125
NMRK1	-0.205981	5.24175e-07	0.0148902	0.172	0.262
ANKRD27	-0.206074	4.01929e-08	0.00114176	0.049	0.116
EEF1E1	-0.206098	1.59529e-08	0.000453174	0.096	0.18
TRMO	-0.20628	9.69776e-10	2.75484e-05	0.091	0.175
FBL	-0.206485	9.20433e-07	0.0261467	0.27	0.372
[truncated: 907 more rows]

## Sheet: Table S5
Table S5
Differential expression analysis of clusters 13+26 and 18+21 among TILs. Only genes with adjusted p-value < 0.05 are shown.
	average(log2FC)	p-value	adjusted p-value	% of cells expressing in clusters 13+26	% of cells expressing in clusters 18+21
NKG7	3.01389	1.86142e-165	5.28772e-161	0.922	0.258
FGFBP2	2.89413	1.33633e-160	3.79612e-156	0.598	0.001
GNLY	3.73764	6.49355e-142	1.84462e-137	0.689	0.048
GZMH	2.21073	2.91369e-118	8.27692e-114	0.875	0.31
PRF1	1.93763	6.47032e-96	1.83802e-91	0.736	0.264
GZMB	1.73226	1.58821e-69	4.51163e-65	0.797	0.263
KLF3	1.67307	6.92912e-68	1.96835e-63	0.493	0.072
C1orf21	0.980131	4.15708e-60	1.1809e-55	0.284	0.006
COTL1	-1.15474	1.21489e-58	3.45115e-54	0.392	0.85
SPON2	1.33942	9.04558e-55	2.56958e-50	0.355	0.034
CX3CR1	0.897932	2.26006e-53	6.42016e-49	0.226	0.001
S1PR5	0.956044	2.11676e-48	6.01307e-44	0.277	0.014
CST7	1.00043	1.93749e-46	5.50382e-42	0.919	0.691
PLEK	1.04938	2.61933e-45	7.44074e-41	0.307	0.026
LTB	-1.66926	2.95011e-44	8.38037e-40	0.243	0.667
CD2	-1.00316	4.16539e-42	1.18326e-37	0.699	0.91
DUSP4	-1.17338	5.33329e-42	1.51503e-37	0.355	0.768
ALOX5AP	-1.07972	5.6735e-42	1.61167e-37	0.51	0.851
AUTS2	1.17159	6.61879e-40	1.8802e-35	0.439	0.095
TRGV2	1.30527	3.99427e-39	1.13465e-34	0.199	0.006
NR4A2	0.962638	5.8736e-37	1.66851e-32	0.861	0.591
TRGV9	1.74183	9.64989e-37	2.74124e-32	0.179	0.004
FLNA	0.979767	3.02496e-36	8.59302e-32	0.787	0.591
IER2	0.937471	2.98819e-35	8.48854e-31	0.774	0.472
KLRG1	0.99443	5.26504e-34	1.49564e-29	0.324	0.056
PRSS23	0.96167	5.92291e-34	1.68252e-29	0.294	0.041
PLAC8	0.813483	1.11344e-33	3.16296e-29	0.226	0.018
CCL5	0.773736	2.72156e-33	7.73112e-29	0.973	0.791
KLF2	1.20909	2.67827e-32	7.60818e-28	0.605	0.242
CKLF	-1.13122	1.1564e-31	3.28499e-27	0.419	0.724
ADGRG1	0.92842	2.67389e-31	7.59572e-27	0.348	0.072
METRNL	0.999138	1.79746e-30	5.10606e-26	0.655	0.407
TGFBR3	0.965427	4.88237e-30	1.38693e-25	0.416	0.135
CD82	-1.02331	9.7202e-30	2.76122e-25	0.169	0.507
LAIR2	0.928246	1.13892e-29	3.23534e-25	0.301	0.053
FCRL6	0.791236	2.06808e-29	5.8748e-25	0.247	0.04
SUN2	0.75556	2.93793e-29	8.34578e-25	0.652	0.512
LITAF	0.863313	4.01881e-28	1.14162e-23	0.72	0.447
CXCR6	-1.00523	7.52301e-28	2.13706e-23	0.145	0.478
CTSW	0.761731	2.31648e-27	6.58043e-23	0.544	0.216
RASA3	0.877462	3.55221e-27	1.00908e-22	0.355	0.112
LGALS3	-0.916108	1.08017e-26	3.06844e-22	0.26	0.599
S1PR1	0.981406	2.66044e-26	7.5575e-22	0.432	0.148
GZMM	0.803775	3.24414e-26	9.21564e-22	0.699	0.413
SNX9	-1.12749	3.67721e-26	1.04459e-21	0.159	0.473
ENC1	0.777237	6.96421e-26	1.97832e-21	0.253	0.042
ARL4C	0.728975	1.08611e-25	3.08532e-21	0.919	0.8
FCGR3A	0.64639	1.64119e-25	4.66212e-21	0.128	0.003
EFHD2	0.795736	2.02772e-25	5.76015e-21	0.716	0.542
ITGAM	0.650092	2.17155e-25	6.16873e-21	0.176	0.016
RBPJ	-0.933917	2.56958e-25	7.2994e-21	0.257	0.582
RPS27	0.342015	4.25188e-25	1.20783e-20	1	1
KLRD1	0.584724	1.40042e-24	3.97817e-20	0.142	0.006
CD74	-0.794452	2.09789e-24	5.95946e-20	0.919	0.963
MATK	0.78782	2.22281e-24	6.31435e-20	0.348	0.099
CCL4	0.55051	2.82695e-23	8.03052e-19	0.682	0.362
P2RY8	0.838286	4.98743e-23	1.41678e-18	0.557	0.284
C12orf75	0.812543	2.38587e-22	6.77754e-18	0.578	0.308
TUBA4A	0.770837	2.90708e-22	8.25813e-18	0.818	0.578
SYNE1	0.82718	8.12598e-22	2.30835e-17	0.486	0.254
CTLA4	-1.05771	1.04473e-21	2.96776e-17	0.264	0.553
KLRK1	0.570209	1.23321e-21	3.50319e-17	0.122	0.005
ZNRF1	-0.836026	1.41504e-21	4.01972e-17	0.084	0.344
RPS3	0.360917	2.5204e-21	7.15969e-17	1	0.999
GAPDH	-0.586275	5.13353e-21	1.45828e-16	0.99	0.994
RAP1GAP2	0.350562	8.54222e-21	2.42659e-16	0.101	0.002
MT-ATP6	0.489825	7.11333e-20	2.02068e-15	0.983	0.961
NR3C1	-0.776195	2.21107e-19	6.281e-15	0.571	0.751
CES1	0.374741	5.51749e-19	1.56735e-14	0.091	0.001
S100A11	-0.696917	5.88045e-19	1.67046e-14	0.669	0.844
RPS14	0.353722	6.68575e-19	1.89922e-14	1	0.998
CAPG	-0.913741	1.08645e-18	3.08629e-14	0.125	0.378
SOX13	0.271913	1.13722e-18	3.23051e-14	0.074	0
RUNX3	0.793195	1.1607e-18	3.29719e-14	0.49	0.28
UBC	-0.444438	1.37355e-18	3.90183e-14	1	0.996
TGFB1	0.596286	1.57487e-18	4.47375e-14	0.912	0.78
RPL3	0.43193	3.05613e-18	8.68155e-14	0.997	0.989
TMSB4X	-0.343025	7.04606e-18	2.00158e-13	1	1
AKNA	0.608848	9.01352e-18	2.56047e-13	0.557	0.449
GNA15	-0.714789	1.06485e-17	3.02491e-13	0.091	0.323
TLE5	0.612823	1.3502e-17	3.83551e-13	0.841	0.735
RPL10	0.292828	2.89078e-17	8.21184e-13	1	1
RPL14	0.396338	3.45744e-17	9.82156e-13	1	0.989
ADAM19	-0.676304	3.7874e-17	1.07589e-12	0.064	0.276
SSBP3	0.585492	3.91831e-17	1.11308e-12	0.203	0.048
KLF6	-0.736497	4.03178e-17	1.14531e-12	0.743	0.898
RPLP1	-0.319516	4.55188e-17	1.29305e-12	1	1
RPL21	0.367363	5.46677e-17	1.55295e-12	0.997	0.993
RPL34	0.306368	1.68652e-16	4.79088e-12	1	1
CORO1B	-0.857489	3.4437e-16	9.78252e-12	0.291	0.522
KLRF1	0.345077	7.10045e-16	2.01702e-11	0.078	0.001
FGR	0.31085	9.18725e-16	2.60982e-11	0.084	0.003
PTGDS	0.532635	9.34607e-16	2.65494e-11	0.081	0.002
RPS3A	0.356129	1.14724e-15	3.25897e-11	1	0.997
RPL29	0.321016	1.44704e-15	4.11062e-11	0.997	0.994
SLAMF7	0.420416	1.63571e-15	4.64656e-11	0.128	0.015
CXCL13	-2.55213	1.68154e-15	4.77676e-11	0.051	0.23
ABHD17A	0.569869	1.78863e-15	5.08097e-11	0.595	0.449
CTSB	-0.744331	1.92745e-15	5.47531e-11	0.291	0.532
BATF	-0.699955	2.35087e-15	6.67812e-11	0.23	0.481
VIM	-0.565652	3.20036e-15	9.09125e-11	0.949	0.981
ZNF683	0.717612	6.07699e-15	1.72629e-10	0.199	0.049
RPS27A	0.267453	6.87373e-15	1.95262e-10	1	0.999
RPL13A	0.376963	6.93317e-15	1.9695e-10	0.976	0.952
MT-ND4	0.517562	7.97381e-15	2.26512e-10	0.926	0.85
PLP2	-0.59954	8.19685e-15	2.32848e-10	0.446	0.685
RAB29	0.526858	1.80208e-14	5.11917e-10	0.213	0.056
PPP2R5C	0.616235	1.82085e-14	5.1725e-10	0.642	0.439
LAPTM5	-0.471084	2.14607e-14	6.09634e-10	0.892	0.959
AHR	-0.735693	2.1686e-14	6.16036e-10	0.162	0.387
ZEB2	0.655966	2.20654e-14	6.26812e-10	0.581	0.351
LGR6	0.34428	2.26879e-14	6.44494e-10	0.078	0.003
PKM	-0.741069	2.38454e-14	6.77375e-10	0.544	0.743
VCL	0.438116	2.93093e-14	8.32588e-10	0.145	0.025
CPNE7	-0.597585	2.93221e-14	8.32954e-10	0.061	0.246
PLIN2	-0.846035	2.99541e-14	8.50907e-10	0.328	0.52
ITM2A	-0.654527	3.00166e-14	8.5268e-10	0.557	0.748
RPS6	0.31375	3.26613e-14	9.2781e-10	1	0.995
TMEM173	-0.7706	3.35371e-14	9.52688e-10	0.189	0.407
TPI1	-0.817255	4.37166e-14	1.24186e-09	0.655	0.795
BIN2	0.661867	4.94964e-14	1.40604e-09	0.48	0.299
PLEKHF1	0.685177	6.04989e-14	1.71859e-09	0.307	0.138
NR4A3	0.692427	8.08715e-14	2.29732e-09	0.537	0.353
TRBV3-1	1.52448	8.18463e-14	2.32501e-09	0.159	0.034
PHLDA1	-0.964128	8.57949e-14	2.43717e-09	0.203	0.423
RPL30	0.248865	9.76892e-14	2.77506e-09	1	1
RPL6	0.314389	9.94336e-14	2.82461e-09	0.997	0.992
MT-ND5	0.419675	1.04471e-13	2.96771e-09	0.966	0.93
TYROBP	0.744601	1.06997e-13	3.03945e-09	0.098	0.01
DNPH1	-0.665388	1.3645e-13	3.87614e-09	0.125	0.334
MFHAS1	-0.673128	1.56107e-13	4.43453e-09	0.095	0.27
TNFRSF18	-0.911268	1.83341e-13	5.20818e-09	0.111	0.295
ABI3	0.529956	2.03726e-13	5.78725e-09	0.253	0.084
HSPA1A	-1.77777	2.30809e-13	6.55659e-09	0.297	0.476
ZNF267	-0.653657	2.65461e-13	7.54096e-09	0.236	0.435
RPL26	0.272129	2.74709e-13	7.80365e-09	1	0.999
HIF1A	-0.760836	3.09979e-13	8.80557e-09	0.291	0.5
PTPRE	0.627598	3.11459e-13	8.84762e-09	0.294	0.119
RPS21	0.296097	3.53581e-13	1.00442e-08	1	0.999
RPS12	0.26286	4.29217e-13	1.21928e-08	0.997	1
TNFRSF4	-0.979734	4.53136e-13	1.28722e-08	0.078	0.241
CLIC1	-0.475362	6.38749e-13	1.81449e-08	0.797	0.884
MT-CYB	0.356933	8.39555e-13	2.38492e-08	0.997	0.987
RPL5	0.339812	1.03031e-12	2.92679e-08	0.986	0.977
LYAR	0.682635	1.26048e-12	3.58066e-08	0.331	0.159
IGFLR1	-0.7263	1.27674e-12	3.62683e-08	0.193	0.387
CYTIP	-0.567952	2.02426e-12	5.75031e-08	0.601	0.722
HSPA1B	-2.42686	2.11999e-12	6.02226e-08	0.162	0.332
PTGER2	0.38987	2.25787e-12	6.41392e-08	0.142	0.029
MIDN	0.66516	2.51851e-12	7.15433e-08	0.48	0.297
OXNAD1	-0.627704	3.15002e-12	8.94827e-08	0.115	0.303
TRGC2	0.400871	3.37074e-12	9.57526e-08	0.108	0.017
RBM38	0.545244	3.97845e-12	1.13016e-07	0.652	0.443
PDE4DIP	-0.608257	4.32729e-12	1.22925e-07	0.108	0.297
ENO1	-0.667616	5.2737e-12	1.4981e-07	0.615	0.723
DSTN	0.593077	5.42508e-12	1.5411e-07	0.456	0.269
RPS23	0.251125	7.11931e-12	2.02238e-07	1	0.999
MXRA7	0.629704	8.48288e-12	2.40973e-07	0.365	0.201
RPL19	0.249242	8.99508e-12	2.55523e-07	1	0.999
GPR25	-0.597885	1.05021e-11	2.98333e-07	0.047	0.2
PXN	0.469428	1.09871e-11	3.1211e-07	0.226	0.076
RPS7	0.280661	1.26324e-11	3.58847e-07	1	0.997
CEP78	0.480808	1.34609e-11	3.82382e-07	0.189	0.056
PAG1	-0.559665	1.48452e-11	4.21709e-07	0.25	0.458
RPL7A	0.260221	1.68088e-11	4.77487e-07	1	0.997
SYTL3	0.589128	1.89395e-11	5.38015e-07	0.514	0.35
GPR141	0.164696	1.89657e-11	5.38759e-07	0.044	0
LILRB1	0.148038	1.89657e-11	5.38759e-07	0.044	0
RPS29	0.289679	2.42926e-11	6.90081e-07	1	0.992
KIF19	0.228126	2.55911e-11	7.26967e-07	0.064	0.003
RPS8	0.275154	2.91499e-11	8.28062e-07	1	0.999
CD300A	0.483395	2.95975e-11	8.40775e-07	0.179	0.053
AKR1C3	0.328713	3.14976e-11	8.94753e-07	0.071	0.005
RPL39	0.251645	3.51056e-11	9.97244e-07	1	0.999
PPP1R15A	-0.633638	3.92983e-11	1.11635e-06	0.524	0.719
RPL32	0.264096	4.09246e-11	1.16255e-06	1	0.999
JMJD6	0.546215	4.50125e-11	1.27867e-06	0.416	0.245
DNAJA1	-0.698328	4.76559e-11	1.35376e-06	0.686	0.775
RPL23A	0.274873	4.88363e-11	1.38729e-06	0.993	0.99
MAZ	0.571324	5.11302e-11	1.45246e-06	0.385	0.21
KLRB1	0.593238	5.8099e-11	1.65042e-06	0.584	0.373
MT-ND3	0.338804	5.98995e-11	1.70157e-06	0.993	0.972
RALA	-0.616383	7.15729e-11	2.03317e-06	0.162	0.345
NPDC1	-0.448346	8.04924e-11	2.28655e-06	0.02	0.141
PROK2	0.467405	8.70927e-11	2.47404e-06	0.149	0.037
PDGFD	0.211352	1.03385e-10	2.93687e-06	0.061	0.003
TYMP	-0.631704	1.05397e-10	2.99402e-06	0.172	0.358
LINC01943	-0.77494	1.17426e-10	3.33572e-06	0.098	0.252
RPL37	0.260837	1.30055e-10	3.69447e-06	1	0.999
MT-ND6	0.490225	1.34859e-10	3.83093e-06	0.699	0.593
RPSA	0.274384	1.48973e-10	4.23188e-06	0.973	0.975
RIPOR2	0.551239	1.55342e-10	4.41281e-06	0.328	0.161
RAP1B	0.45291	1.59271e-10	4.52441e-06	0.75	0.625
LIMS1	-0.589838	1.72912e-10	4.91192e-06	0.169	0.354
ST8SIA6	0.357793	1.78315e-10	5.06539e-06	0.084	0.011
NELL2	-0.591665	1.83987e-10	5.22651e-06	0.047	0.183
MIF	-0.481971	1.891e-10	5.37175e-06	0.831	0.908
GRAMD1B	-0.48856	1.89552e-10	5.3846e-06	0.057	0.203
MT-CO2	0.271569	2.17908e-10	6.19012e-06	1	0.999
CD7	-0.907319	2.36314e-10	6.71296e-06	0.466	0.542
TMCC3	0.292596	2.5372e-10	7.20741e-06	0.078	0.008
ASCL2	0.259205	2.55036e-10	7.24481e-06	0.078	0.008
NMB	-0.663746	2.98715e-10	8.4856e-06	0.051	0.186
LCP2	-0.578578	3.15296e-10	8.95662e-06	0.443	0.598
OSBPL5	0.240855	3.3966e-10	9.64873e-06	0.064	0.005
ANXA1	-0.161073	4.06163e-10	1.15379e-05	0.882	0.745
TRAT1	-0.596754	4.20139e-10	1.19349e-05	0.193	0.369
PRKCB	0.526504	4.22256e-10	1.1995e-05	0.331	0.183
GK5	0.409512	4.26389e-10	1.21124e-05	0.162	0.048
JAML	-0.519039	6.13506e-10	1.74279e-05	0.084	0.241
TSC22D2	0.517438	6.5814e-10	1.86958e-05	0.345	0.17
HLA-DRA	-0.662446	7.0036e-10	1.98951e-05	0.372	0.555
HLA-DRB1	-0.526454	7.04747e-10	2.00197e-05	0.682	0.772
SORL1	0.49297	7.31232e-10	2.07721e-05	0.294	0.132
SIRPG	-0.573594	7.40042e-10	2.10224e-05	0.068	0.214
CMKLR1	0.171655	7.5276e-10	2.13837e-05	0.037	0
CHST12	0.467029	8.05316e-10	2.28766e-05	0.297	0.135
HSP90AB1	-0.565877	8.63433e-10	2.45275e-05	0.875	0.925
FTL	0.307072	8.71399e-10	2.47538e-05	0.976	0.944
KIR3DL2	0.384717	8.72213e-10	2.47769e-05	0.081	0.01
NAB1	-0.478147	1.00413e-09	2.85244e-05	0.068	0.21
ACTB	-0.349885	1.23757e-09	3.51556e-05	1	1
HLF	-0.279517	1.32064e-09	3.75155e-05	0	0.068
PKIA	-0.365155	1.33677e-09	3.79735e-05	0.014	0.108
RASGRP2	0.479668	1.45105e-09	4.12199e-05	0.223	0.087
S1PR4	0.553251	1.53213e-09	4.35232e-05	0.314	0.169
APMAP	0.485158	1.71426e-09	4.86969e-05	0.436	0.255
CTSL	-0.562761	1.81523e-09	5.15653e-05	0.037	0.16
LPCAT1	0.446022	1.86308e-09	5.29246e-05	0.203	0.077
SYNE2	0.53942	1.89943e-09	5.39572e-05	0.578	0.438
PRR7	0.370566	2.13416e-09	6.06249e-05	0.149	0.041
EEF1A1	0.203475	2.15386e-09	6.11846e-05	1	1
MYL6	-0.317699	2.35866e-09	6.70026e-05	0.946	0.969
DGKD	0.354692	2.45223e-09	6.96604e-05	0.152	0.043
SOD1	-0.470267	2.50329e-09	7.11109e-05	0.639	0.747
LDLRAD4	-0.466123	2.51737e-09	7.15109e-05	0.23	0.418
ITGA5	0.404496	2.6395e-09	7.49802e-05	0.206	0.076
NCAM1	0.186844	2.71002e-09	7.69837e-05	0.047	0.001
RGS1	-0.491889	2.75651e-09	7.83043e-05	0.459	0.651
PDCL3	-0.614188	2.76178e-09	7.84537e-05	0.297	0.45
AGAP1	0.203372	2.8357e-09	8.05538e-05	0.051	0.002
MALAT1	0.35218	3.00182e-09	8.52726e-05	0.997	1
RNF125	0.546611	3.08437e-09	8.76178e-05	0.449	0.3
SAMD3	0.525192	3.17785e-09	9.02733e-05	0.351	0.193
SLCO4C1	0.157234	3.52707e-09	0.000100193	0.047	0.001
TTYH2	0.152567	3.82472e-09	0.000108649	0.047	0.001
CLCF1	0.267394	4.23369e-09	0.000120267	0.081	0.011
ADRB2	0.473701	4.5967e-09	0.000130578	0.206	0.081
CACYBP	-0.571852	4.62177e-09	0.000131291	0.338	0.518
HSPB1	-0.719431	4.74722e-09	0.000134854	0.334	0.49
ENTPD1	-0.589722	4.97669e-09	0.000141373	0.041	0.156
FCRL3	0.228683	5.02235e-09	0.00014267	0.054	0.004
TOX2	-0.424474	5.40117e-09	0.000153431	0.047	0.172
PFKFB3	-0.588276	5.7862e-09	0.000164368	0.236	0.415
ADD3	0.515636	6.01179e-09	0.000170777	0.324	0.187
HTRA1	-0.399897	6.0795e-09	0.0001727	0.003	0.081
RPS15	0.19458	6.45204e-09	0.000183283	0.997	1
CACNA2D2	0.221965	6.70027e-09	0.000190335	0.061	0.005
ABRACL	-0.507593	7.15769e-09	0.000203329	0.328	0.501
RPL35A	0.223341	7.44956e-09	0.00021162	1	0.999
RPS15A	0.192116	7.60586e-09	0.00021606	1	1
BST2	-0.581397	7.62045e-09	0.000216474	0.236	0.407
RPL17	0.270344	9.58202e-09	0.000272196	0.99	0.988
PRDM1	-0.66442	9.78294e-09	0.000277904	0.277	0.429
SPN	0.469761	9.84597e-09	0.000279694	0.47	0.356
ZNF276	0.437373	9.89986e-09	0.000281225	0.196	0.078
KLF13	0.520199	1.07442e-08	0.000305211	0.389	0.228
CD96	-0.432926	1.0861e-08	0.000308529	0.5	0.677
SAMSN1	-0.482132	1.09776e-08	0.00031184	0.618	0.724
TNFSF9	0.45197	1.11399e-08	0.000316451	0.264	0.119
PGK1	-0.478229	1.12206e-08	0.000318745	0.794	0.835
NCF4	-0.478692	1.13257e-08	0.00032173	0.095	0.232
RPS10	0.484239	1.17647e-08	0.0003342	0.345	0.182
PLEKHA1	0.315654	1.18731e-08	0.000337279	0.139	0.039
IGFBP3	0.316298	1.34746e-08	0.000382773	0.088	0.015
LTBP4	0.411044	1.42943e-08	0.000406058	0.226	0.094
MAL	-0.580084	1.42946e-08	0.000406067	0.041	0.145
RPS28	0.205423	1.59085e-08	0.000451913	1	0.999
TTC16	0.201162	1.7391e-08	0.000494026	0.051	0.003
IL32	-0.438913	1.74581e-08	0.000495931	0.986	0.992
HSPH1	-0.777941	1.75884e-08	0.000499633	0.243	0.398
CD28	-0.478581	1.81857e-08	0.000516601	0.108	0.257
CCR4	-0.394488	1.91987e-08	0.000545378	0.027	0.132
ICOS	-0.556986	1.96694e-08	0.000558748	0.209	0.371
DNAJB1	-0.935259	2.0089e-08	0.000570667	0.74	0.814
ITGAL	0.499076	2.13377e-08	0.000606141	0.419	0.263
SUSD1	0.278781	2.23231e-08	0.000634133	0.078	0.012
ETV3	0.475051	2.31716e-08	0.000658237	0.267	0.139
LATS2	0.230118	2.5455e-08	0.000723099	0.081	0.013
KCTD17	-0.405229	2.74197e-08	0.000778912	0.03	0.131
TSPAN32	0.386984	2.8739e-08	0.000816389	0.128	0.043
CD3E	-0.270571	3.03342e-08	0.000861705	0.956	0.977
LINC00892	-0.48895	3.12568e-08	0.000887912	0.078	0.198
RPL13	0.18979	3.19816e-08	0.0009085	1	1
KIAA0319L	-0.506495	3.38004e-08	0.000960168	0.047	0.161
HSPA8	-0.62341	3.40609e-08	0.000967568	0.932	0.928
CCR5	-0.298808	3.46526e-08	0.000984375	0.037	0.139
AC243829.1	0.322747	3.82468e-08	0.00108648	0.118	0.03
TXNIP	-0.385853	3.8282e-08	0.00108748	0.338	0.521
CD44	-0.368747	3.90207e-08	0.00110846	0.767	0.855
LYN	0.289091	3.94971e-08	0.00112199	0.098	0.021
AL590550.1	0.162173	3.94974e-08	0.001122	0.037	0.001
CDK6	-0.494777	3.97135e-08	0.00112814	0.084	0.218
PATL2	0.423715	3.98149e-08	0.00113102	0.166	0.065
PTPN12	0.332805	4.36176e-08	0.00123905	0.095	0.021
EMP3	0.386684	4.66937e-08	0.00132643	0.801	0.645
SRSF2	0.400919	4.81625e-08	0.00136815	0.75	0.677
SARAF	-0.284015	4.87472e-08	0.00138476	0.959	0.97
LINC01578	-0.38251	5.23487e-08	0.00148707	0.672	0.79
RPS18	0.200416	5.76309e-08	0.00163712	1	0.998
ABCG1	-0.431999	6.08577e-08	0.00172878	0.074	0.201
DDN-AS1	0.173581	6.25967e-08	0.00177818	0.051	0.003
MAST4	-0.447882	6.58618e-08	0.00187094	0.057	0.169
ARL3	-0.370893	7.01698e-08	0.00199331	0.024	0.117
IL2RG	-0.371971	7.08973e-08	0.00201398	0.895	0.936
FABP5	-0.562892	7.17308e-08	0.00203766	0.189	0.353
PHTF2	-0.502621	7.28226e-08	0.00206867	0.149	0.293
RGS10	-0.4865	7.34904e-08	0.00208764	0.301	0.472
TRPS1	-0.47702	7.6208e-08	0.00216484	0.081	0.212
RHOH	-0.493688	7.88296e-08	0.00223931	0.372	0.537
ZBED2	-0.411836	7.97276e-08	0.00226482	0.017	0.106
TXN	-0.466124	8.4801e-08	0.00240894	0.554	0.657
GADD45B	0.337465	9.32342e-08	0.0026485	0.476	0.302
FURIN	-0.472024	9.7903e-08	0.00278113	0.057	0.17
SMAP2	-0.505805	1.15459e-07	0.00327986	0.402	0.553
FRMD4B	-0.532527	1.17282e-07	0.00333162	0.068	0.185
GADD45G	-0.643107	1.21355e-07	0.00344734	0.105	0.218
CSGALNACT1	-0.359807	1.31093e-07	0.00372397	0.024	0.118
IFITM1	0.268887	1.39148e-07	0.00395277	0.953	0.879
PIK3R1	0.546913	1.42718e-07	0.00405419	0.473	0.339
CTSD	-0.480949	1.42755e-07	0.00405525	0.486	0.611
NUAK1	0.140539	1.54412e-07	0.00438639	0.037	0.001
RNF168	0.45729	1.62179e-07	0.00460701	0.291	0.154
LCK	-0.361142	1.70904e-07	0.00485487	0.584	0.739
CYSLTR1	-0.328951	1.86486e-07	0.0052975	0.017	0.103
DEF6	-0.421241	1.87626e-07	0.00532988	0.291	0.46
KLRC2	0.180028	1.88764e-07	0.00536222	0.027	0
FCER1G	0.275575	1.97392e-07	0.00560731	0.051	0.004
FOSL2	0.459354	2.14171e-07	0.00608397	0.574	0.421
NR1D2	0.442019	2.16752e-07	0.00615729	0.355	0.209
ACAP1	-0.426207	2.21232e-07	0.00628453	0.355	0.524
CCR6	-0.541352	2.23437e-07	0.00634718	0.047	0.154
MYO7A	-0.360605	2.2491e-07	0.00638901	0.02	0.109
RAB11FIP1	-0.523372	2.32467e-07	0.00660368	0.139	0.27
NCDN	-0.38215	2.43736e-07	0.00692381	0.027	0.121
JUN	-0.652114	2.45359e-07	0.00696991	0.787	0.87
ZEB1	-0.402768	2.51981e-07	0.00715803	0.054	0.165
FCMR	0.445111	2.52466e-07	0.0071718	0.291	0.152
CLU	-0.468099	2.5476e-07	0.00723696	0.061	0.17
NDUFA4	-0.339009	2.63302e-07	0.00747961	0.672	0.755
UAP1	0.448697	2.66227e-07	0.00756272	0.318	0.179
SRGN	-0.314841	2.70076e-07	0.00767206	0.99	0.987
FGL2	0.370899	3.00376e-07	0.00853277	0.186	0.075
BCL9L	0.41501	3.06941e-07	0.00871927	0.206	0.093
MRPS6	-0.483197	3.08178e-07	0.00875442	0.26	0.41
TNFAIP8	-0.472657	3.11448e-07	0.00884729	0.206	0.36
HINT1	-0.338017	3.22586e-07	0.0091637	0.797	0.872
AQP3	-0.501558	3.23372e-07	0.00918603	0.135	0.256
TSTD1	-0.41769	3.29951e-07	0.00937293	0.27	0.433
KDSR	-0.463824	3.36045e-07	0.00954603	0.091	0.203
PTGDR	0.240011	3.54036e-07	0.0100571	0.081	0.016
PDZD4	0.106233	3.71619e-07	0.0105566	0.034	0.001
IRS2	-0.44641	3.91767e-07	0.0111289	0.057	0.167
TRAV26-1	0.406575	4.07251e-07	0.0115688	0.166	0.068
CFH	0.176227	4.19304e-07	0.0119112	0.064	0.01
SMAD7	0.474431	4.22234e-07	0.0119944	0.514	0.37
TNFSF10	-0.468848	4.33053e-07	0.0123017	0.105	0.237
PMF1	-0.435267	4.44366e-07	0.0126231	0.142	0.283
RPL27A	0.290052	4.6125e-07	0.0131027	0.868	0.841
LINC02273	-0.251365	4.7758e-07	0.0135666	0.003	0.065
PRDX1	-0.447271	4.84959e-07	0.0137762	0.48	0.593
KLF16	0.338572	4.89276e-07	0.0138989	0.152	0.057
RUNX2	-0.458565	4.95588e-07	0.0140782	0.118	0.251
EVL	-0.38889	5.34565e-07	0.0151854	0.608	0.749
FKBP1A	-0.45697	5.47723e-07	0.0155592	0.307	0.457
CALM1	0.248724	5.69654e-07	0.0161822	0.959	0.959
PSME2	-0.382479	5.90888e-07	0.0167854	0.517	0.665
RPL18	0.210808	5.93641e-07	0.0168636	1	0.997
ETV7	-0.319253	6.15718e-07	0.0174907	0.02	0.105
EEF1B2	0.267674	6.20004e-07	0.0176124	0.946	0.899
AGPAT5	-0.383698	6.94751e-07	0.0197358	0.044	0.145
SUSD3	-0.374164	6.9893e-07	0.0198545	0.088	0.212
NTN4	0.163041	7.21152e-07	0.0204858	0.041	0.003
AC025171.1	0.195612	7.26375e-07	0.0206341	0.068	0.012
SENP7	-0.393457	7.50856e-07	0.0213296	0.061	0.17
KDM5B	-0.431185	7.64859e-07	0.0217273	0.084	0.198
TSHZ2	-0.420144	8.04951e-07	0.0228662	0.044	0.138
HLA-DQB1	-0.494169	8.41843e-07	0.0239142	0.226	0.376
CITED2	-0.61513	8.79708e-07	0.0249899	0.405	0.531
RPS11	0.320821	9.49722e-07	0.0269787	0.909	0.828
ALDOA	-0.356915	9.51475e-07	0.0270286	0.605	0.737
CLIC3	0.396643	9.70021e-07	0.0275554	0.169	0.07
PLEKHA2	0.474371	9.92685e-07	0.0281992	0.375	0.238
MXD4	0.41499	1.01084e-06	0.0287148	0.476	0.324
AGPAT4	0.210798	1.04942e-06	0.029811	0.091	0.025
MIR155HG	-0.446114	1.08903e-06	0.0309361	0.044	0.139
ELOVL5	-0.436578	1.08993e-06	0.0309617	0.28	0.42
NDUFA13	-0.327848	1.0916e-06	0.031009	0.649	0.739
GNAS	-0.319233	1.10356e-06	0.0313488	0.791	0.861
TRDC	0.0726107	1.122e-06	0.0318728	0.03	0.002
CD247	0.399975	1.14586e-06	0.0325505	0.642	0.499
CORO1A	-0.347805	1.15841e-06	0.0329069	0.841	0.901
DNAJB9	-0.422548	1.16116e-06	0.0329851	0.186	0.295
NBL1	-0.41683	1.16744e-06	0.0331635	0.057	0.159
AC011611.3	-0.356203	1.1761e-06	0.0334093	0.02	0.102
RGCC	-0.382495	1.19261e-06	0.0338784	0.811	0.883
PELI1	-0.455639	1.19384e-06	0.0339134	0.111	0.239
SH2D1B	0.125647	1.19524e-06	0.0339533	0.024	0
RNASEK	-0.390411	1.22135e-06	0.034695	0.662	0.757
CHD1	0.326369	1.23815e-06	0.0351722	0.412	0.364
PTPN13	-0.283907	1.24268e-06	0.0353009	0.007	0.07
CDC25B	0.335014	1.27063e-06	0.0360949	0.155	0.061
SYNJ2	-0.272539	1.28553e-06	0.036518	0.041	0.13
ATF7IP2	-0.398015	1.32702e-06	0.0376966	0.071	0.178
FAM102A	-0.410108	1.34277e-06	0.0381441	0.101	0.226
ARMH1	-0.316214	1.37095e-06	0.0389444	0.017	0.094
GYG1	-0.467789	1.37445e-06	0.0390439	0.149	0.28
TAB2	-0.507551	1.38857e-06	0.0394452	0.209	0.341
MTRNR2L12	0.441025	1.40936e-06	0.0400358	0.916	0.82
RPL18A	0.184112	1.44255e-06	0.0409785	1	0.999
TLE4	0.396286	1.45672e-06	0.041381	0.243	0.123
TRGV3	0.29251	1.46242e-06	0.041543	0.071	0.017
RPLP2	0.202283	1.48166e-06	0.0420896	1	0.994
MTHFD2	-0.507473	1.60104e-06	0.0454807	0.24	0.382
ODF3B	-0.319937	1.61685e-06	0.04593	0.027	0.109
MYBL1	0.370918	1.66642e-06	0.0473381	0.155	0.061
DPP4	-0.433093	1.75999e-06	0.0499961	0.054	0.154

## Sheet: Table S6
Table S6
Demographics of the IHC cohort
		IHC cohort
		n = 56
Age-years
	Median	71
	Range	43-83
Sex-No. (%)
	Male	31 (55.4)
	Female	25 (44.6)
Histology-No. (%)
	Sq	6 (10.7)
	Non-Sq	50 (89.3)
PD-L1 TPS-No. (%)
	<1%	18 (32.1)
	1-49%	21 (37.5)
	≧50%	8 (14.3)
	Unknown	9 (16.1)
Disease p-stage-No. (%)
	Stage Ⅰ	45 (80.4)
	Stage Ⅱ	3 (5.4)
	Stage Ⅲ	7 (12.5)
	Stage Ⅳ	1 (1.8)
Driver mutation status-No. (%)
	Wild type	25 (44.6)
	EGFR (19 del or L858R)	28 (50.0)
	ALK	3 (5.4)
Abbreviations: No., number; PD-L1, programmed cell death-1 ligand-1; TPS, tumor proportional score; Sq, squamous; c-stage, clinical stage; p-stage, pathological stage; EGFR, epidermal growth factor receptor; del, deletion; ALK, anaplastic lymphoma kinase.

## Sheet: Table S7
Table S7
Numerical differences in CD8+ clusters between TILs and PBMCs from 8 lung cancer patients
CD8	TILs	PBMC1	%TILs	%PBMC1	p-value
1	2697	1155	0.348855	0.101112	0.000970238
2	1675	1014	0.21666	0.0887683	0.00684017
3	675	1538	0.0873108	0.134641	0.0120735
4	452	1433	0.0584659	0.125449	0.0753039
5	248	1282	0.0320786	0.11223	0.0205824
6	30	932	0.00388048	0.0815898	0.00529846
7	189	1006	0.024447	0.0880679	0.022759
8	196	892	0.0253525	0.0780881	0.187962
9	264	748	0.0341482	0.0654819	0.308254
10	645	275	0.0834303	0.0240742	0.000318549
11	167	411	0.0216013	0.03598	0.132238
12	132	333	0.0170741	0.0291517	0.188028
13	337	91	0.0435907	0.00796638	8.21852e-07
14	20	177	0.00258699	0.0154951	0.0583342
15	4	136	0.000517397	0.0119058	0.0345742

## Sheet: Table S8
Table S8
Demographics of the neoadjuvant cohort
		NAC cohort
		n = 20
Age-years
	Median	66
	Range	53-77
Sex-No. (%)
	Male	15 (75)
	Female	5 (5)
Histology-No. (%)
	Sq	8 (40)
	Non-Sq	12 (60)
PD-L1 TPS-No. (%)
	<1%	5 (25)
	1-49%	8 (40)
	≧50%	5 (25)
	Unknown	2 (10)
Disease p-stage-No. (%)
	Stage Ⅱ	8 (40)
	Stage ⅢA	12 (60)

## Sheet: Table S9
Table S9
Antigen	Conjugate	Clone	Manufacturer
Smooth Muscle Actin	141Pr	1A4	Standard BioTools
Collagen type I	169Tm	Polyclonal	Standard BioTools
E-cadherin	158Gd	24E10	Standard BioTools
Histone H3	176Yb	D1H2	Standard BioTools
Vimentin	143Nd	D21H3	Standard BioTools
CD20	161Dy	H1	Standard BioTools
CD3	170Er	Polyclonal, C-terminal	Standard BioTools
CD4	156Gd	EPR6855	Standard BioTools
CD45RO	173Yb	UCHL1	Standard BioTools
CD68	159Tb	KP1	Standard BioTools
CD8a	162Dy	C8/144B	Standard BioTools
FoxP3	155Gd	PCH101	Standard BioTools
Pan-keratin	148Nd	C11	Standard BioTools
CD31	145Nd	JC70A	Standard BioTools
PNAd	152Sm	MECA79-R	Standard BioTools

## Sheet: Table S10
Table S10
Product information for the TotalSeq™-C antibodies used in our study
TotalSeq™-C0072 anti-human CD4 antibody
TotalSeq™-C0080 anti-human CD8 antibody
TotalSeq™-C0147 anti-human CD62L antibody
TotalSeq™-C0063 anti-human CD45RA antibody
TotalSeq™-C0140 anti-human CD183 (CXCR3) antibody
TotalSeq™-C0071 anti-human CD194 (CCR4) antibody
TotalSeq™-C0143 anti-human CD196 (CCR6) antibody
TotalSeq™-C090 anti-mouse IgG1, κ antibody

[truncated: 2 more sheets: Table S11, Table S12]
